# Supplementary material for: Construction of highly functional α-amino nitriles via a novel multicomponent tandem organocatalytic reaction: a facile access to α-methylene γ-lactams
Source: Royal Society of Chemistry journal article supplement (doi:10.1039/c2ob07112f), 2012-01-01

**Construction of Highly Functional  $\alpha$ -Amino Nitriles *via* a Novel Multicomponent Tandem Organocatalytic  
Reaction: a Facile Access to  $\alpha$ -Methylene  $\gamma$ -Lactams**

Feng Pan, Jian-Ming Chen, Zhe Zhuang, Yin-Zhi Fang, Sean Xiao-An Zhang and Wei-Wei Liao\*

Department of Organic Chemistry, College of Chemistry, Jilin University, 2699 Qianjin Street, Changchun 130012, China. E-mail: wliao@jlu.edu.cn; Tel:  
0431-85168420;

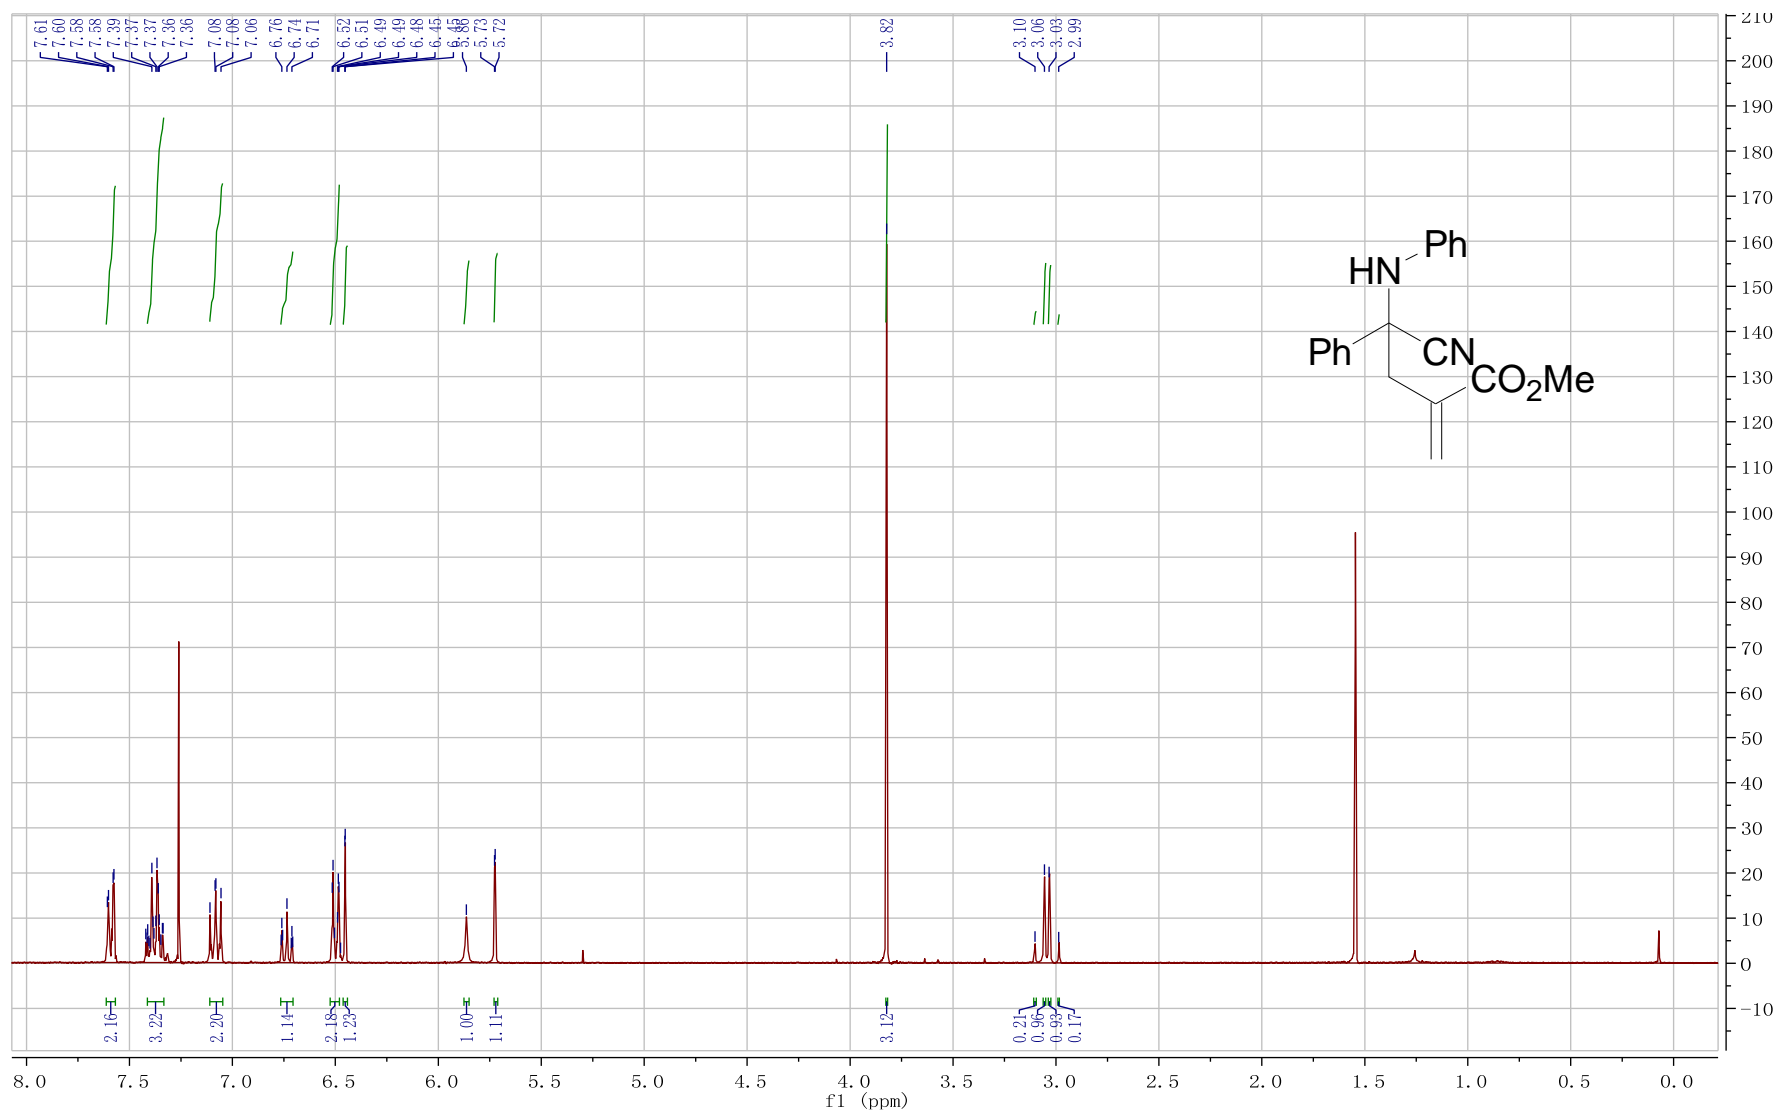

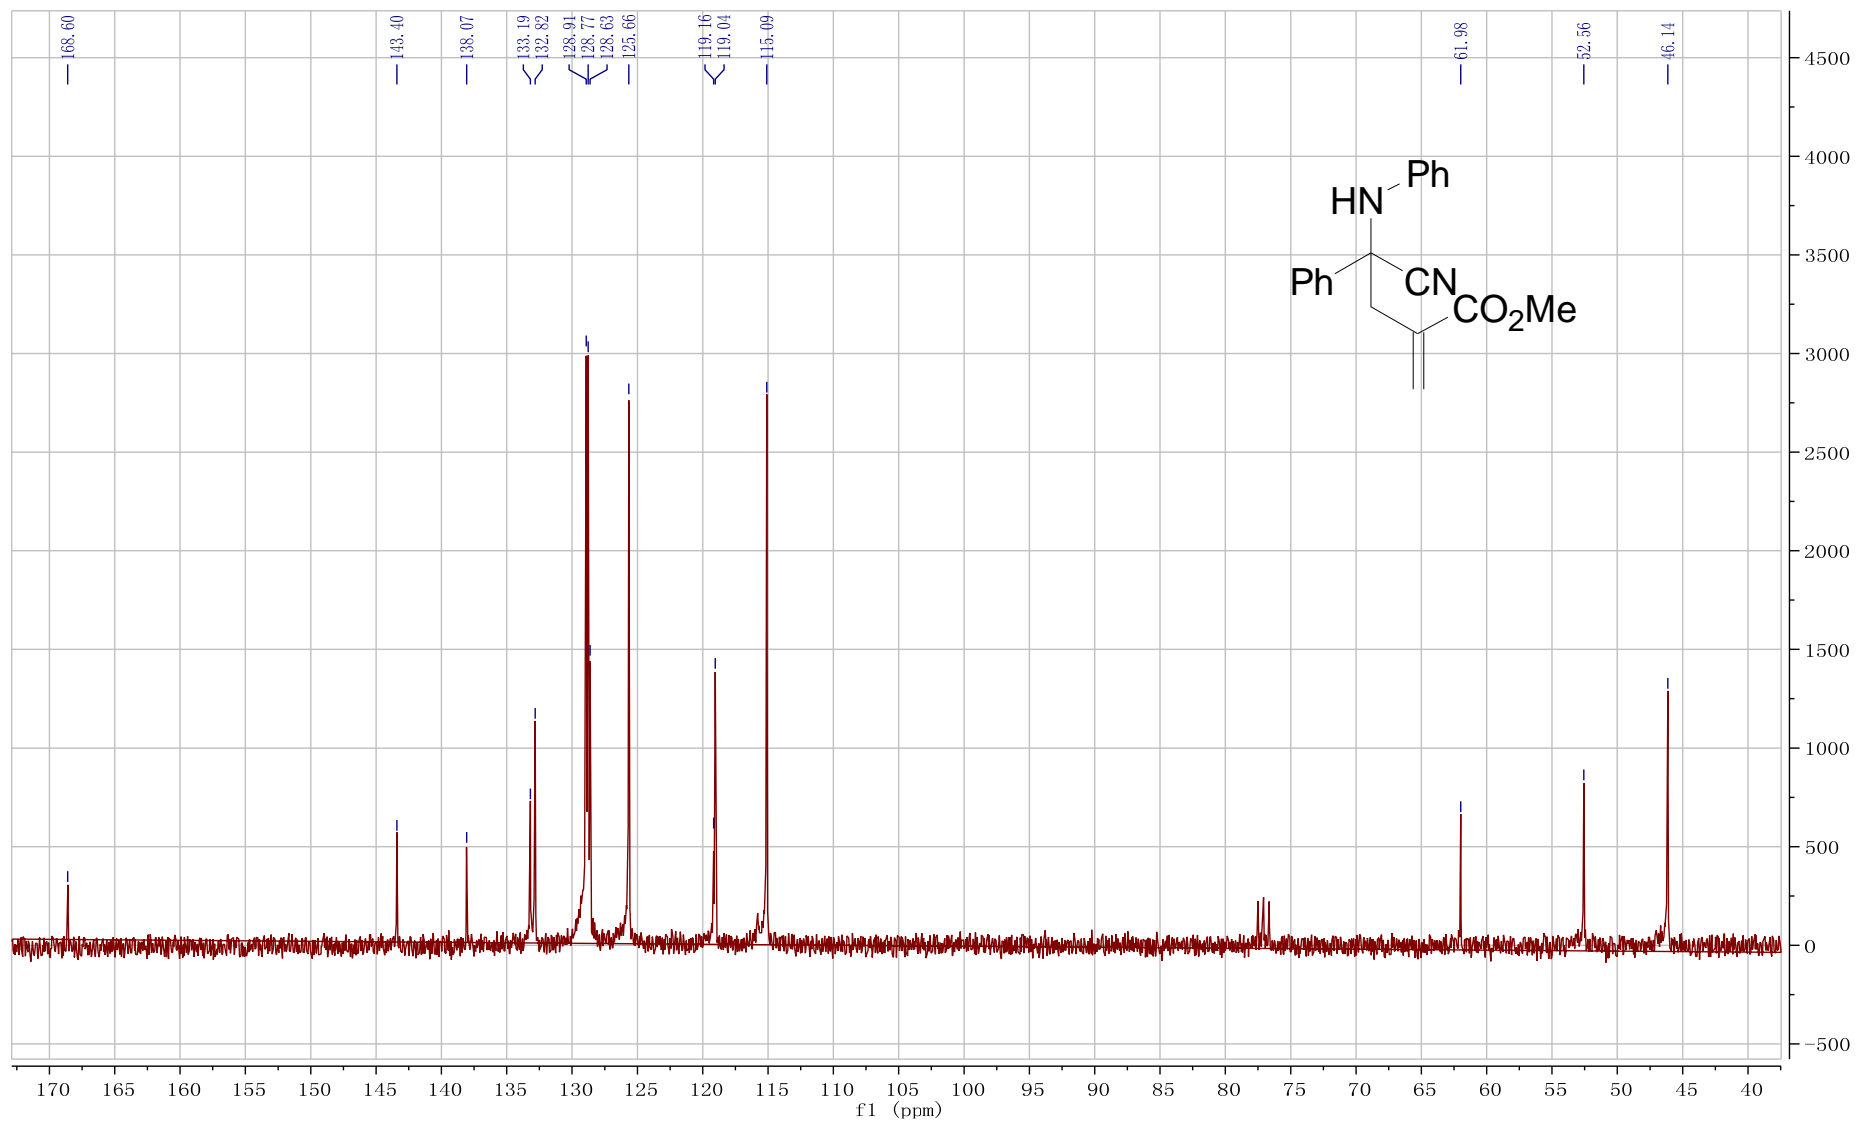

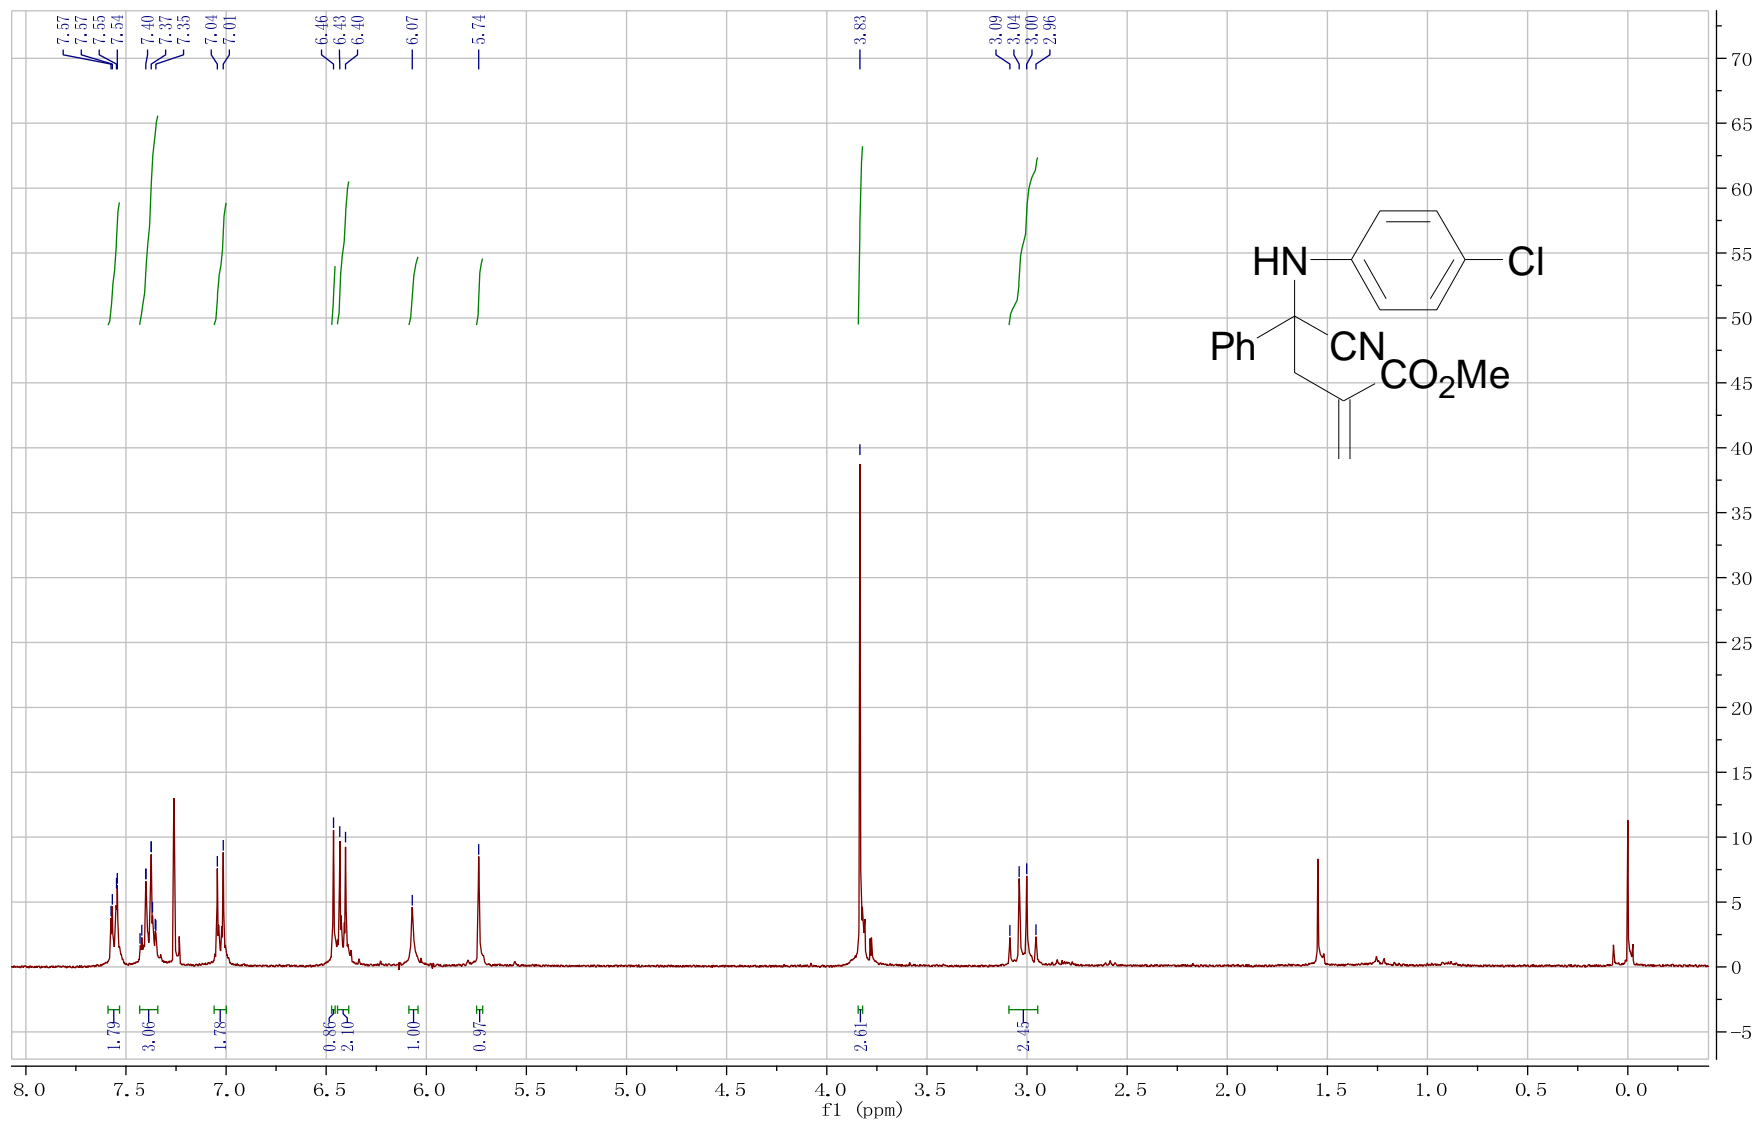

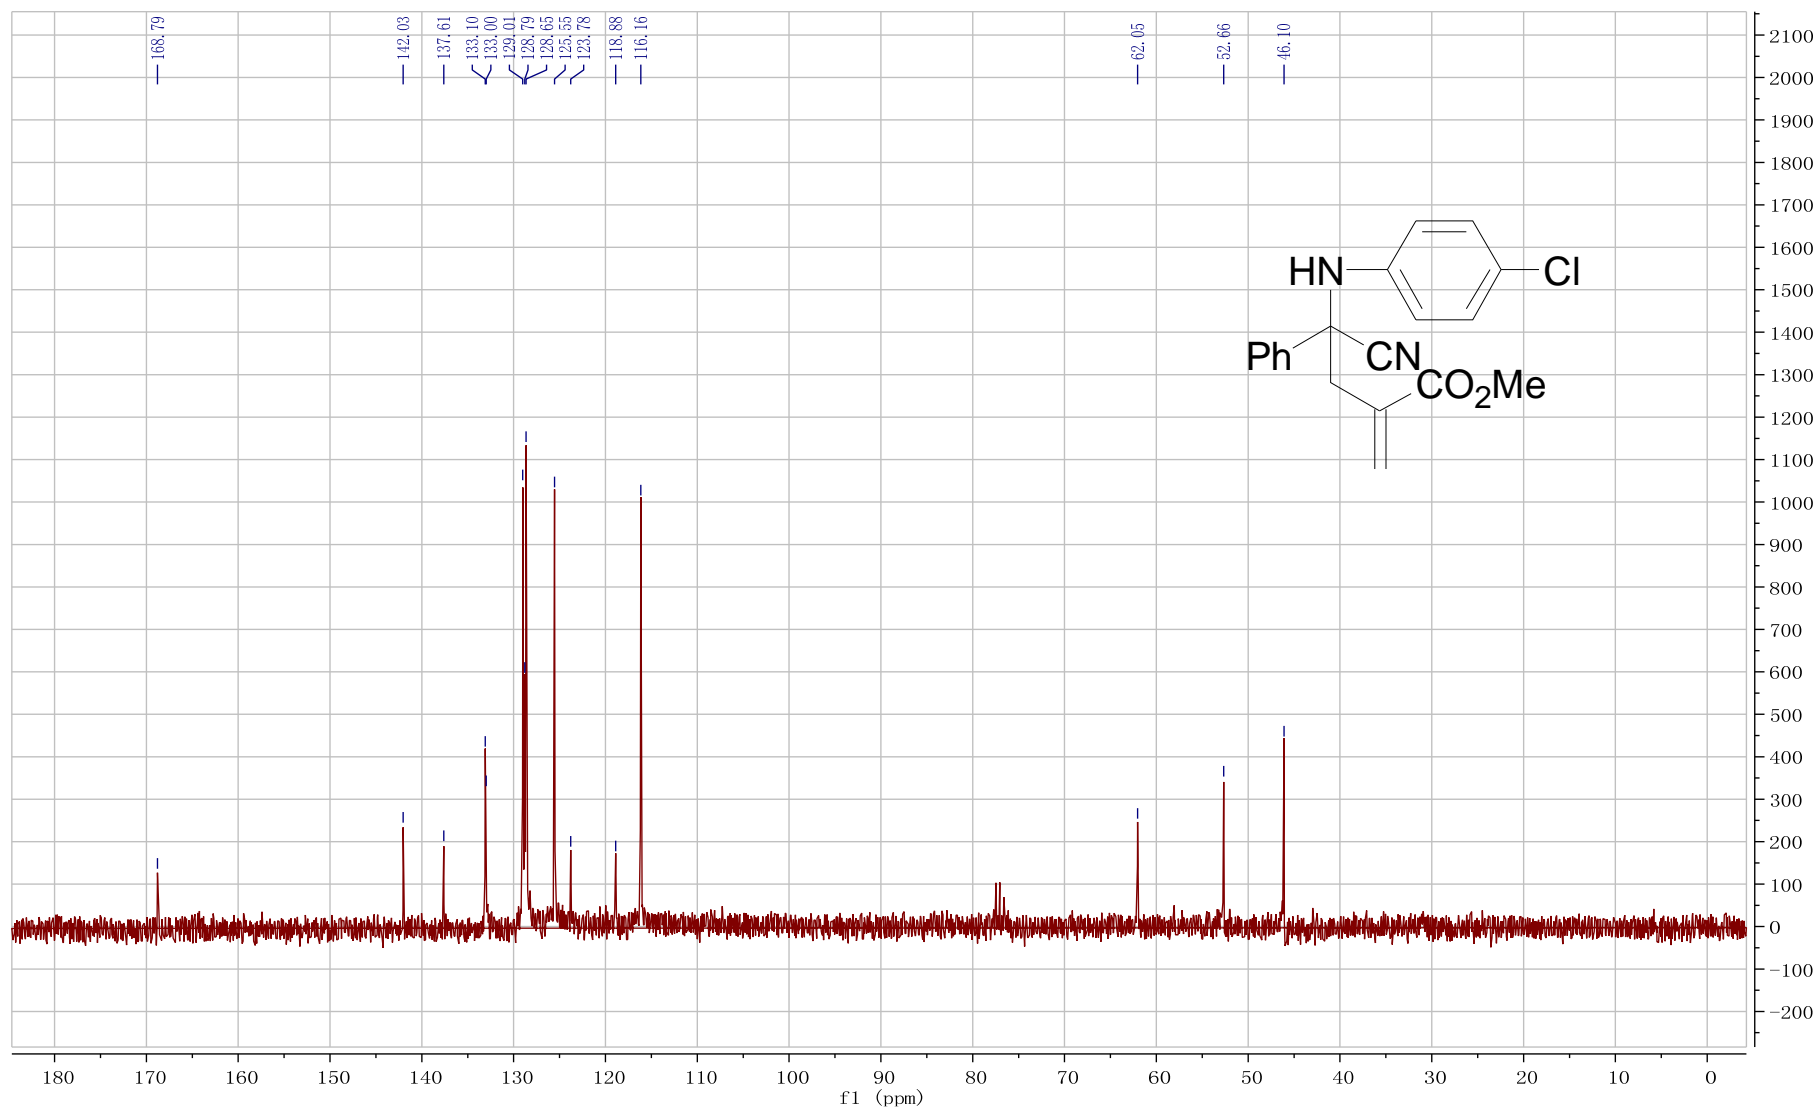

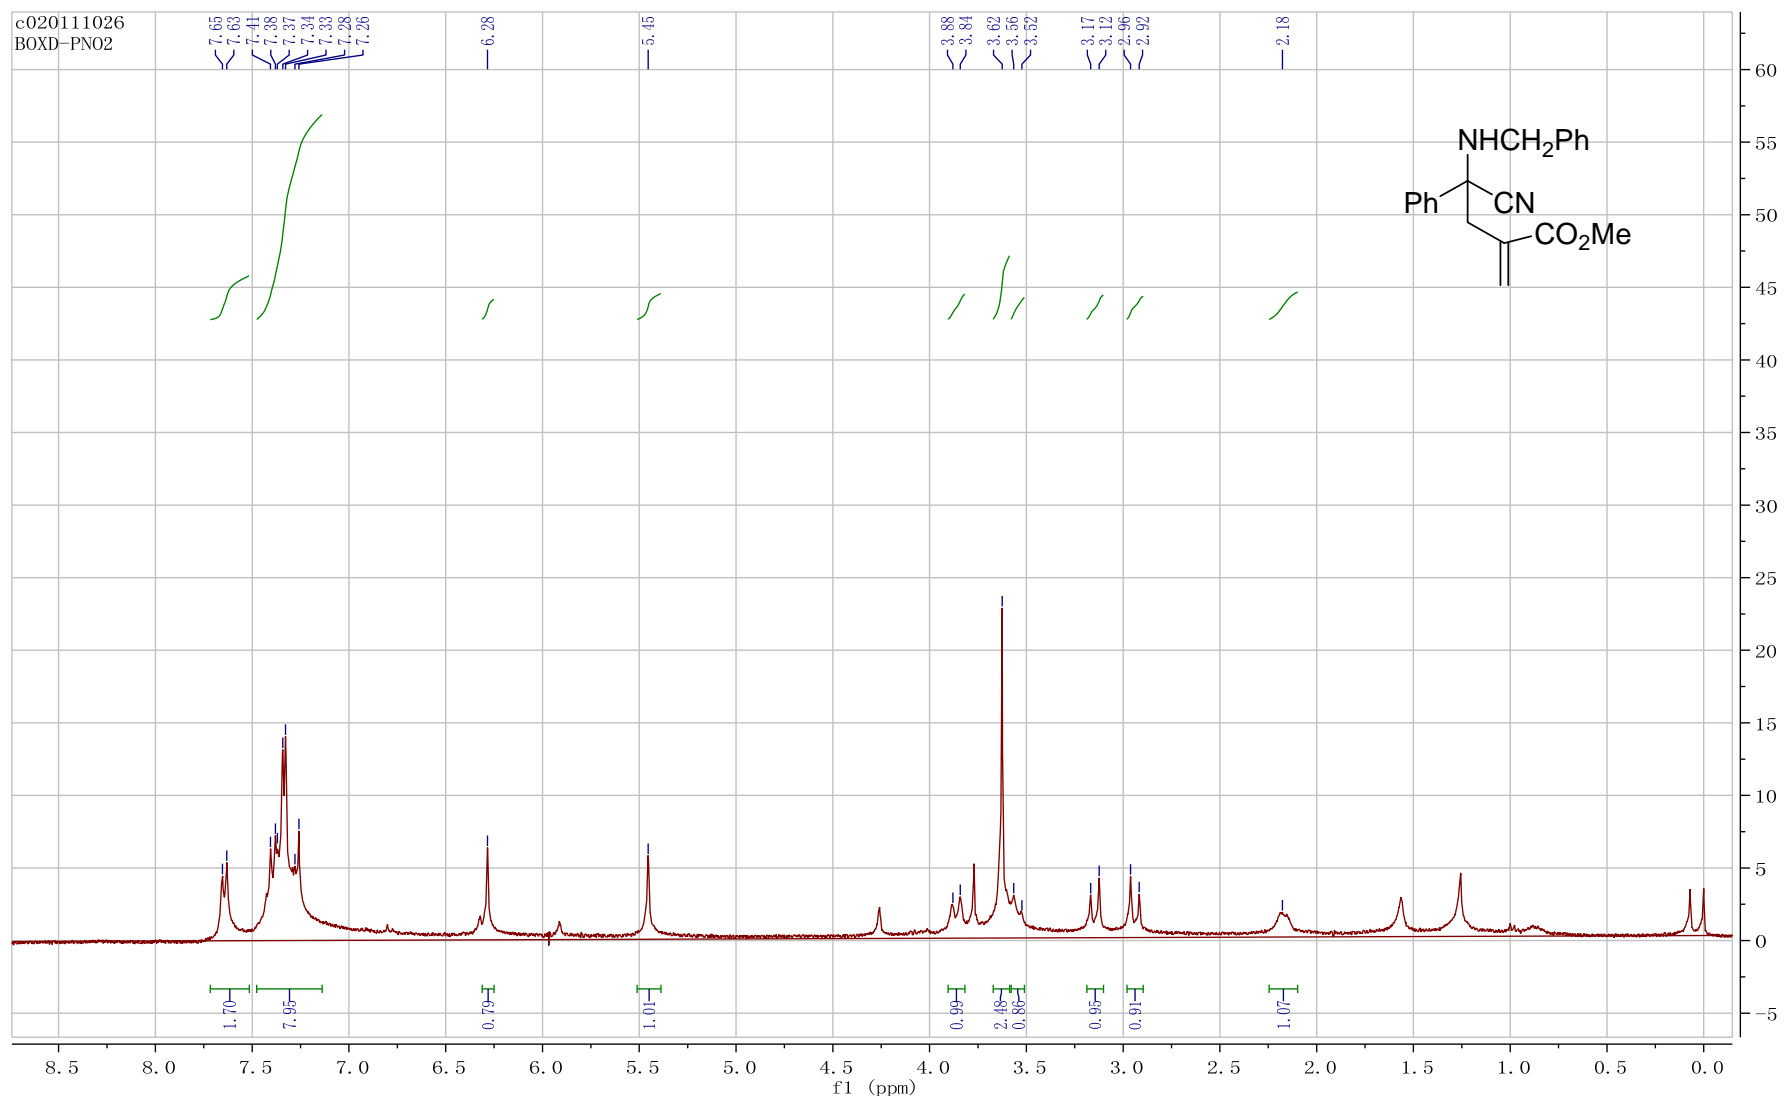

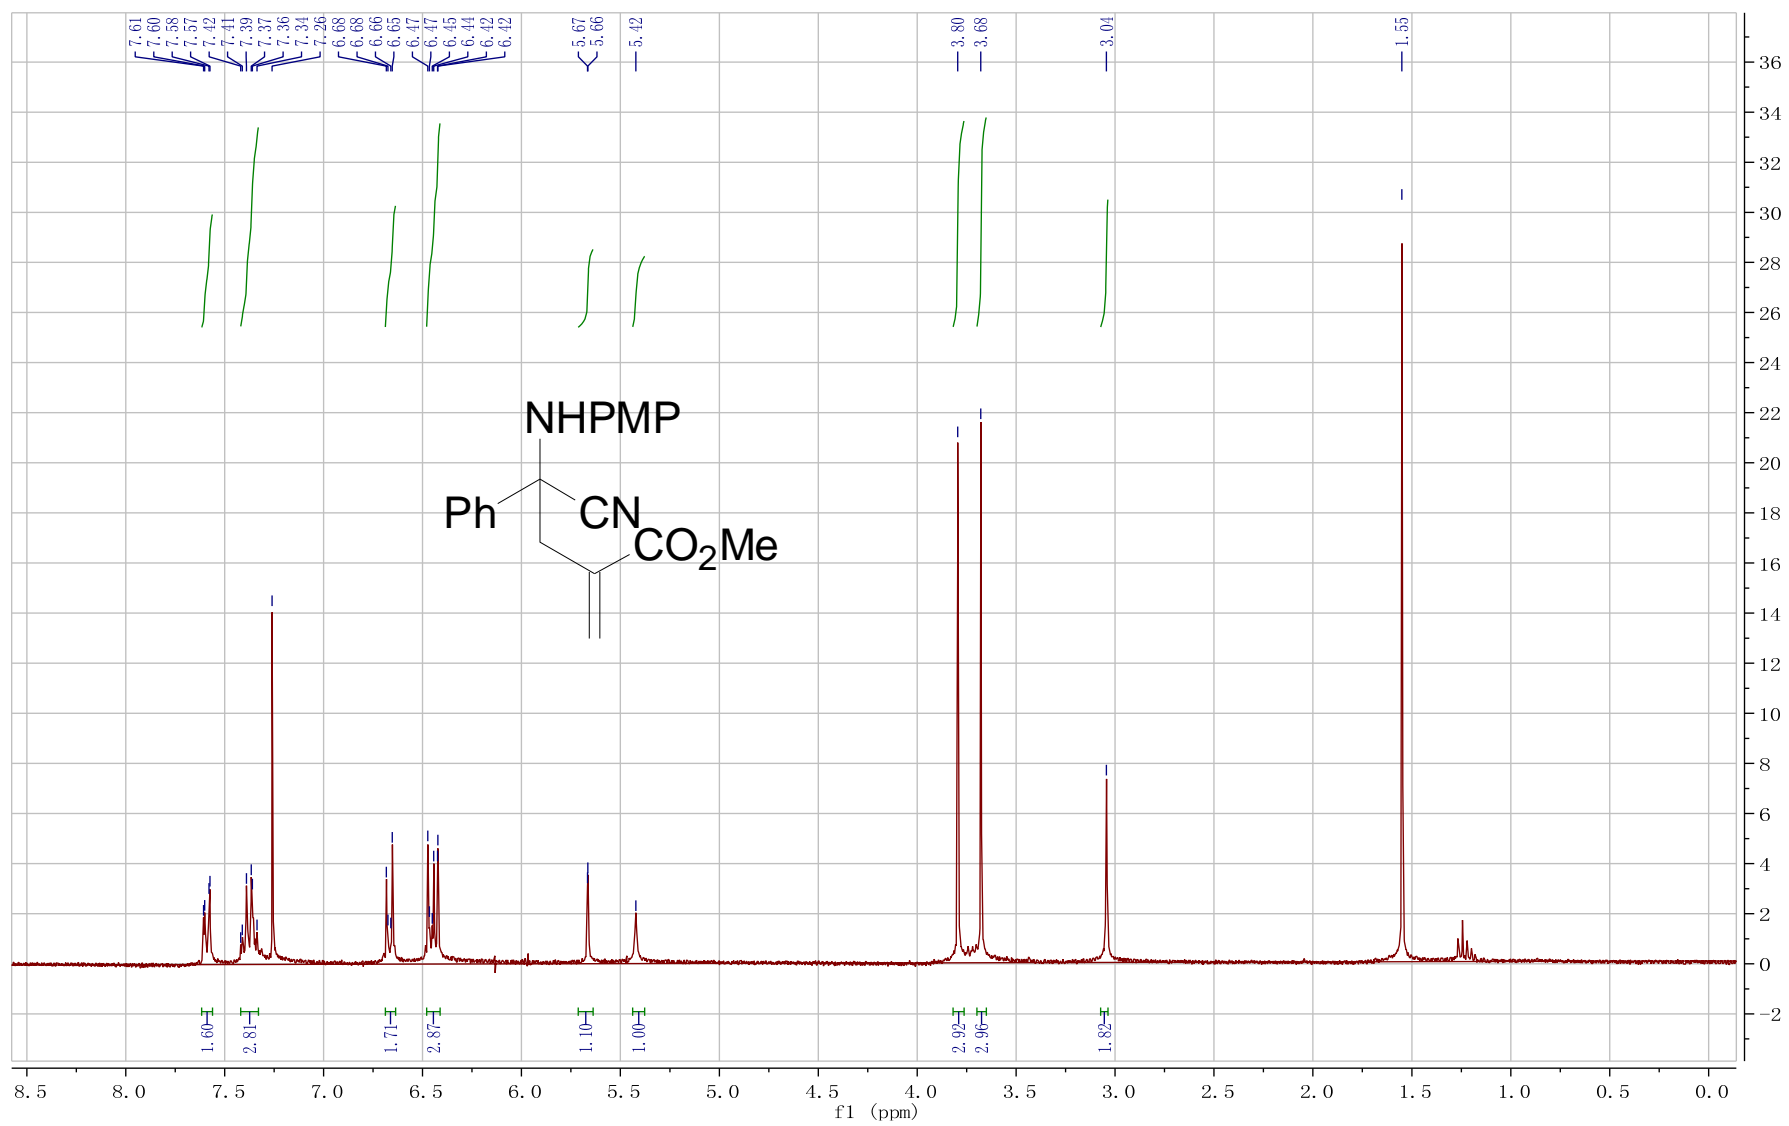

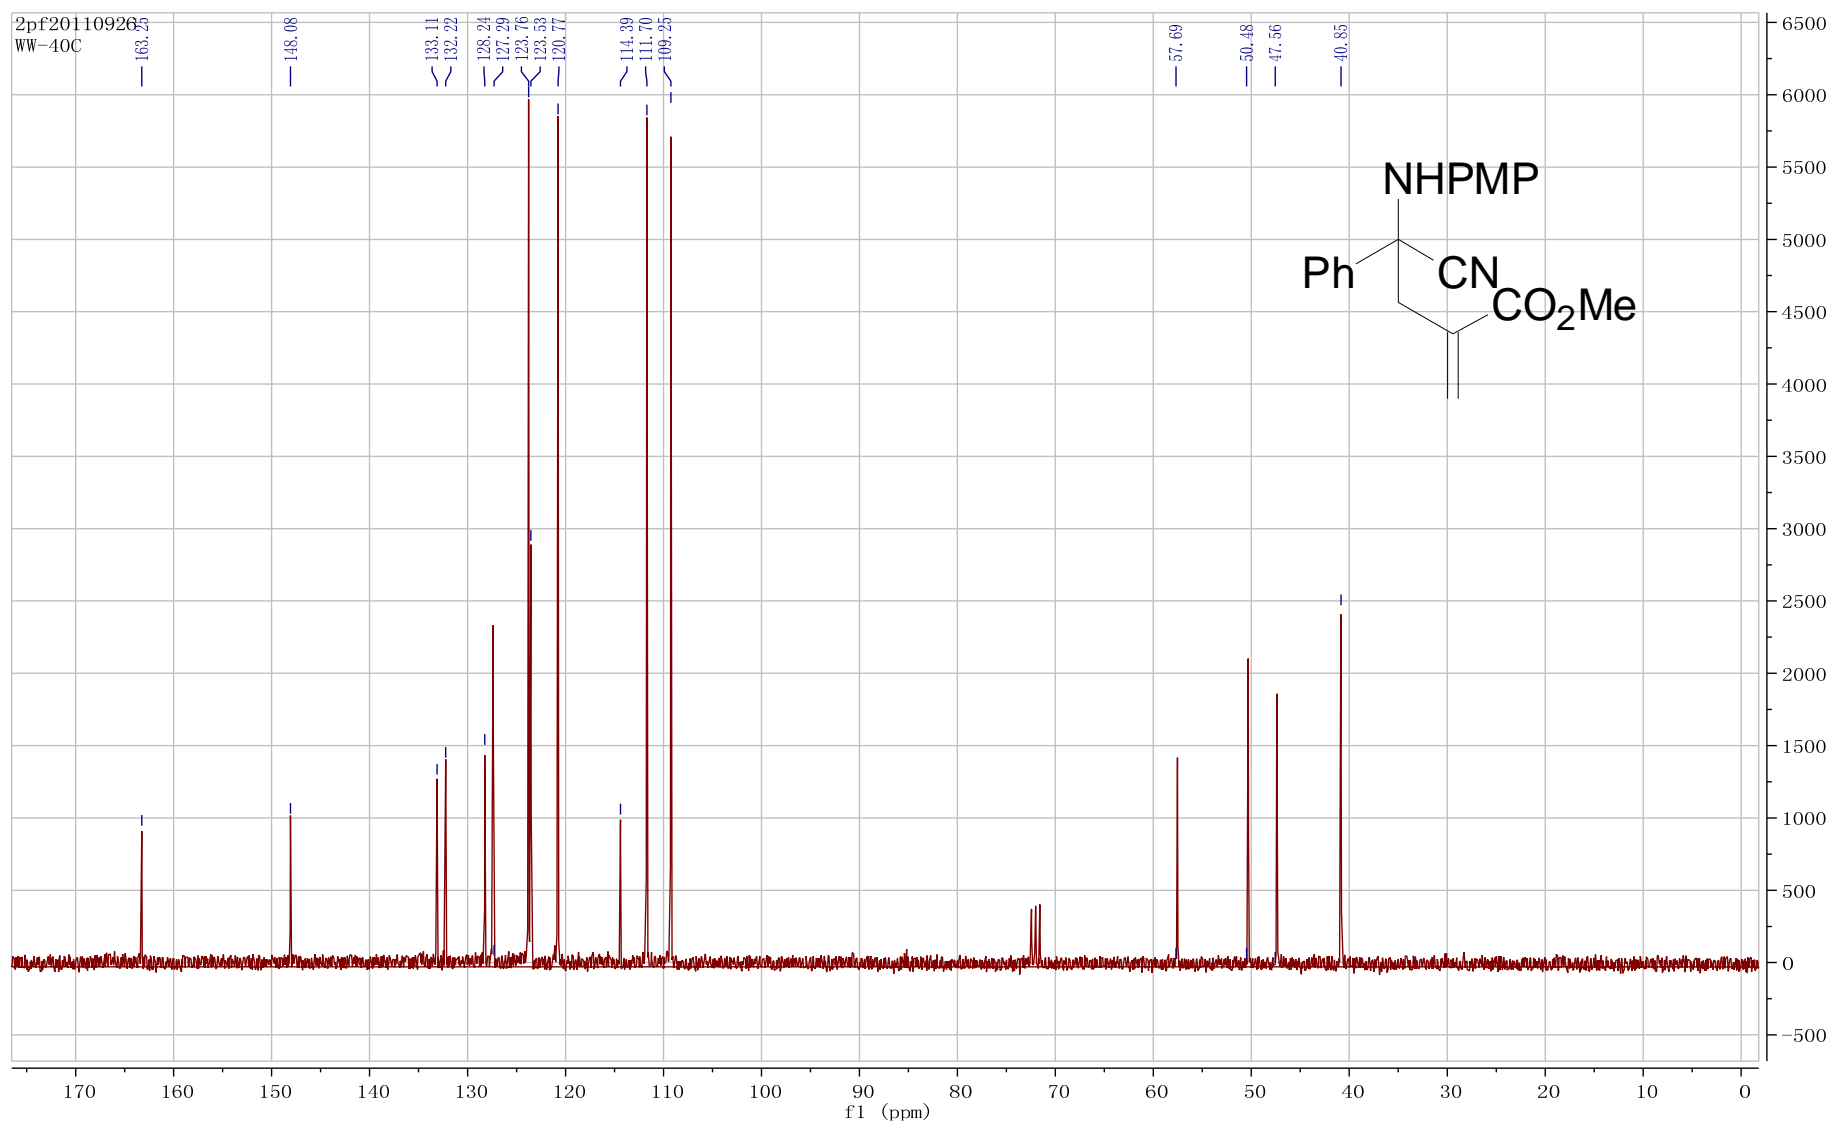



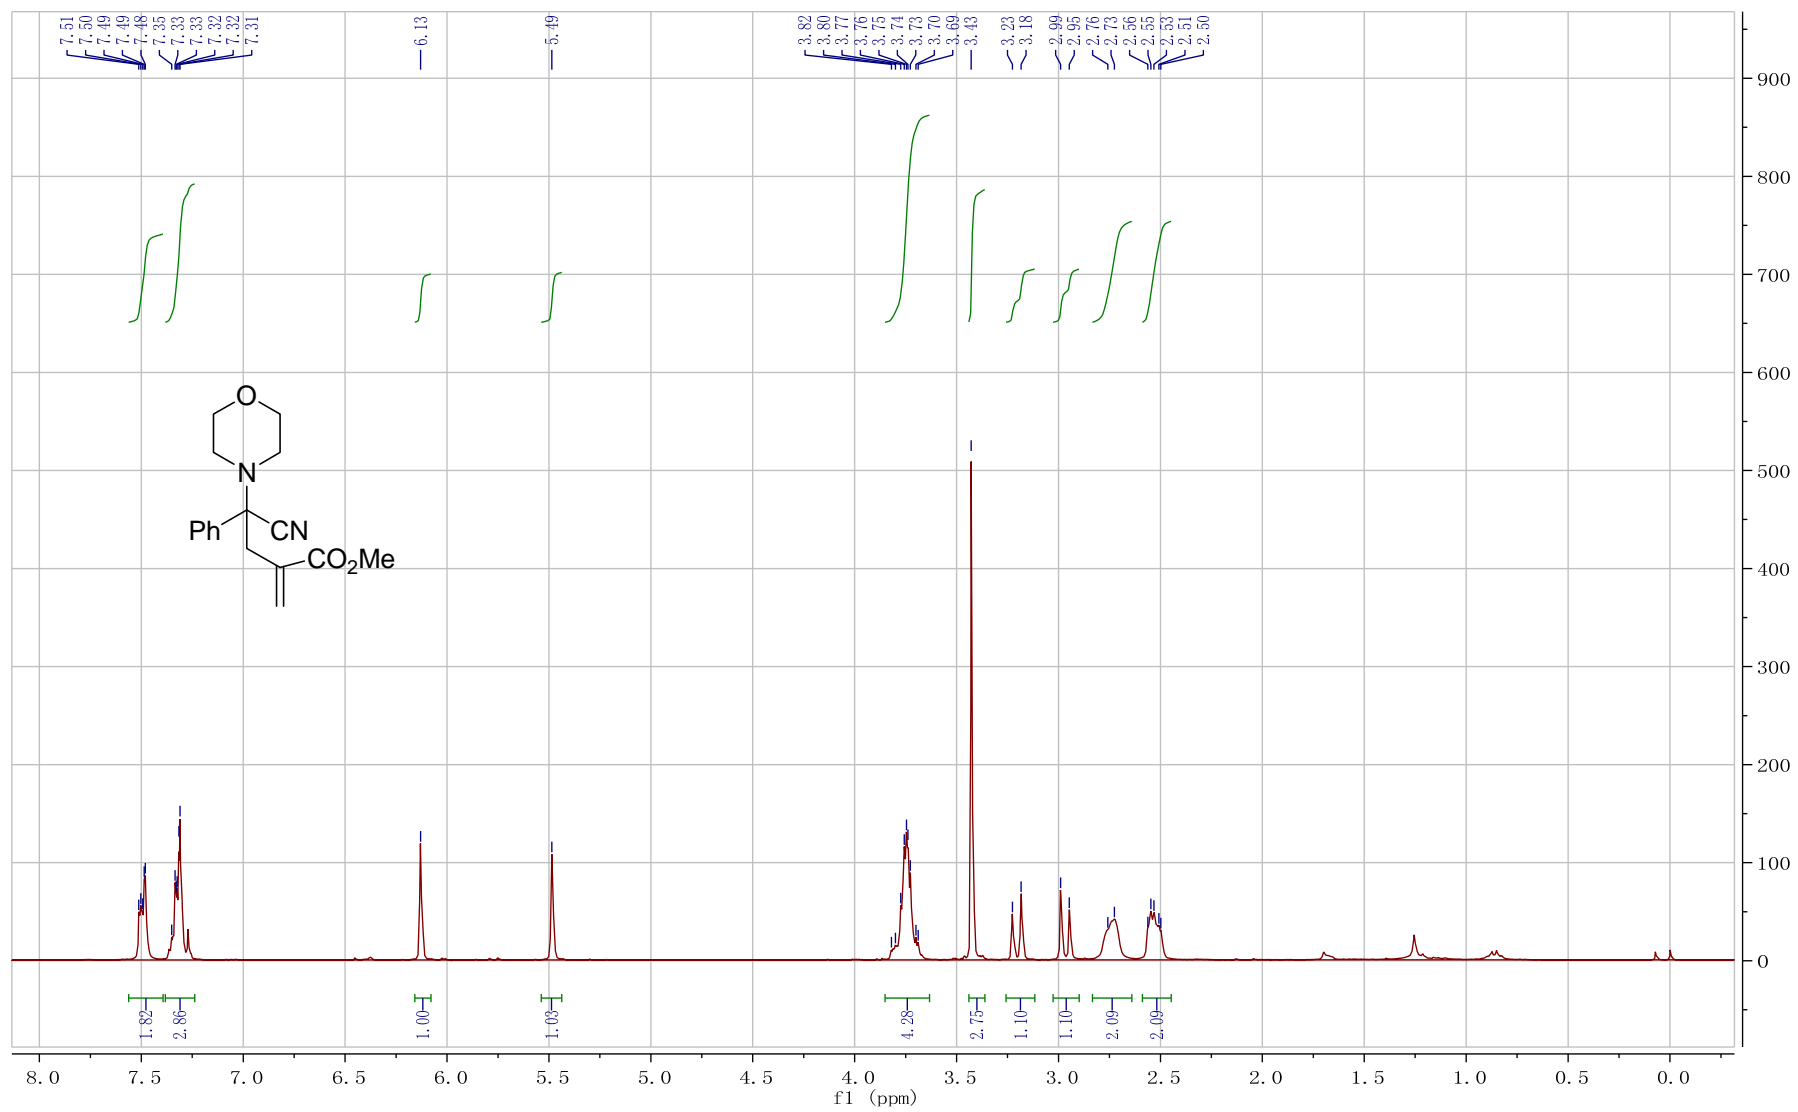

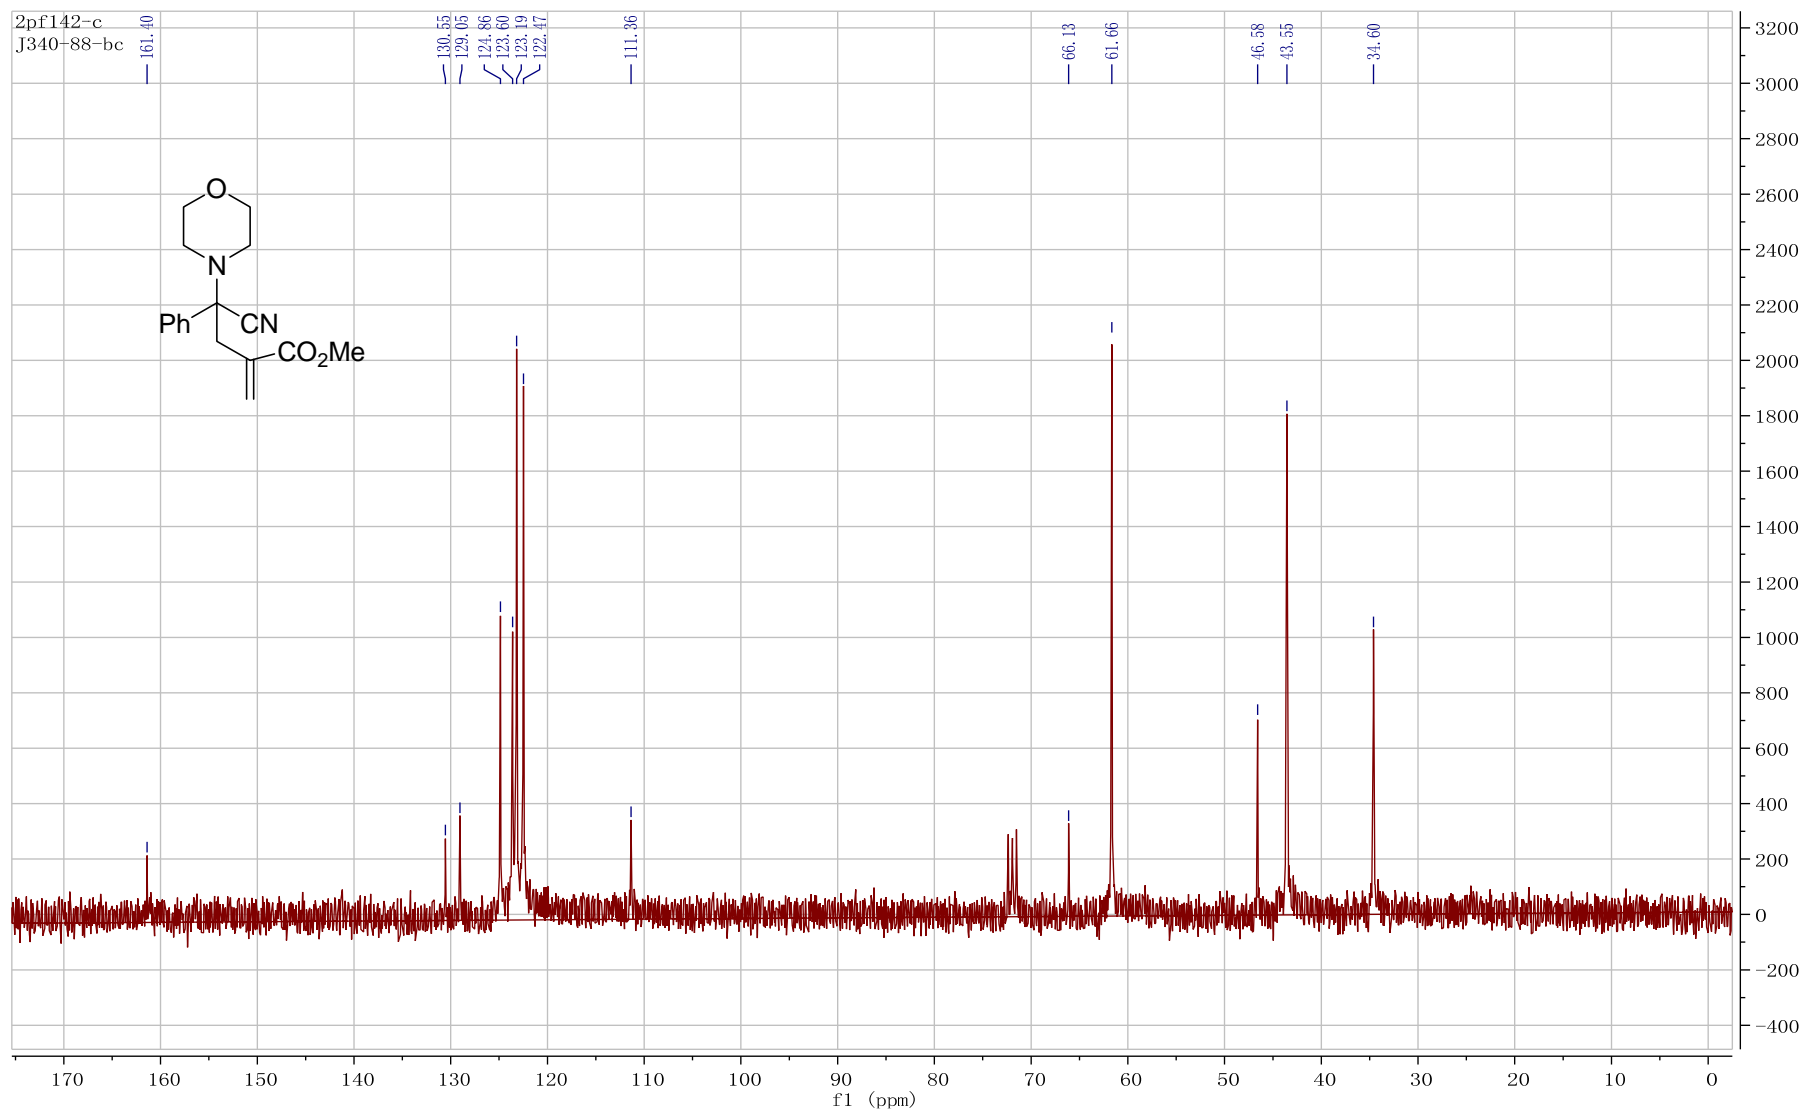

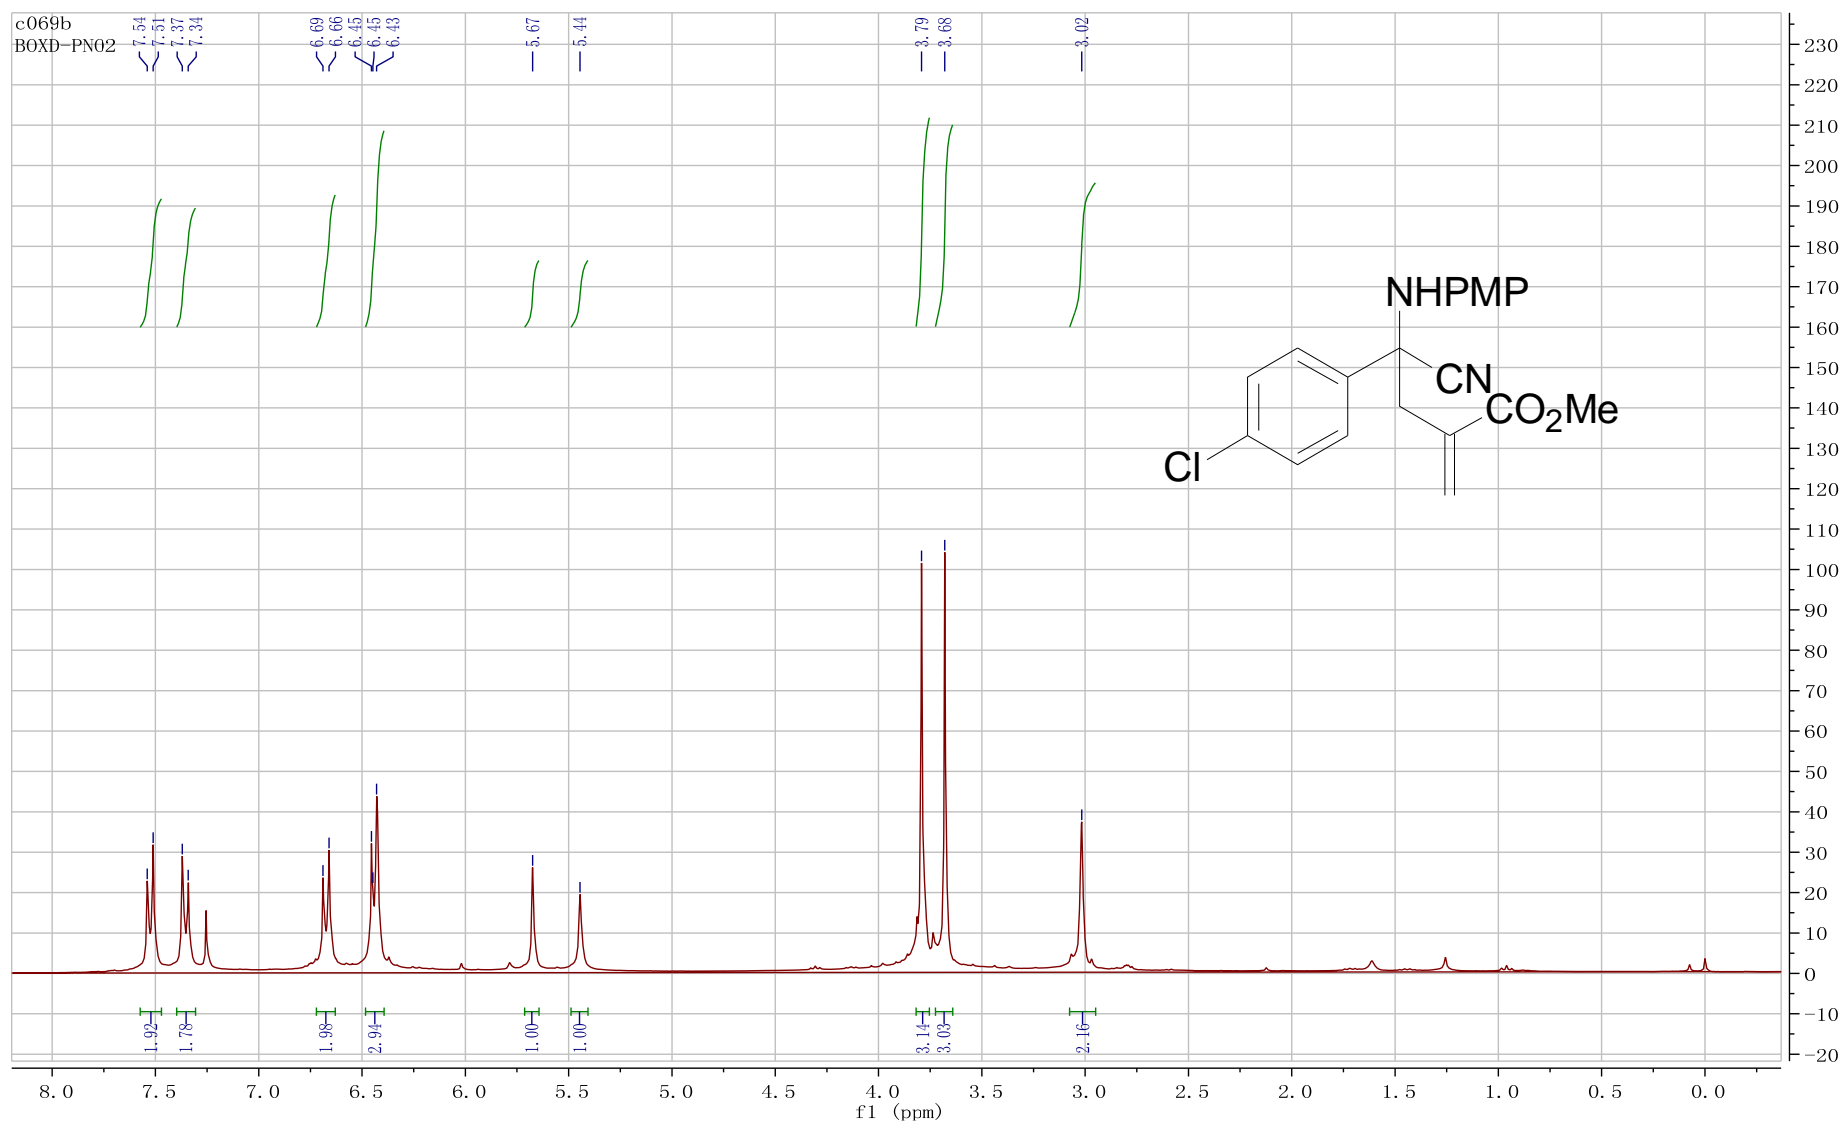

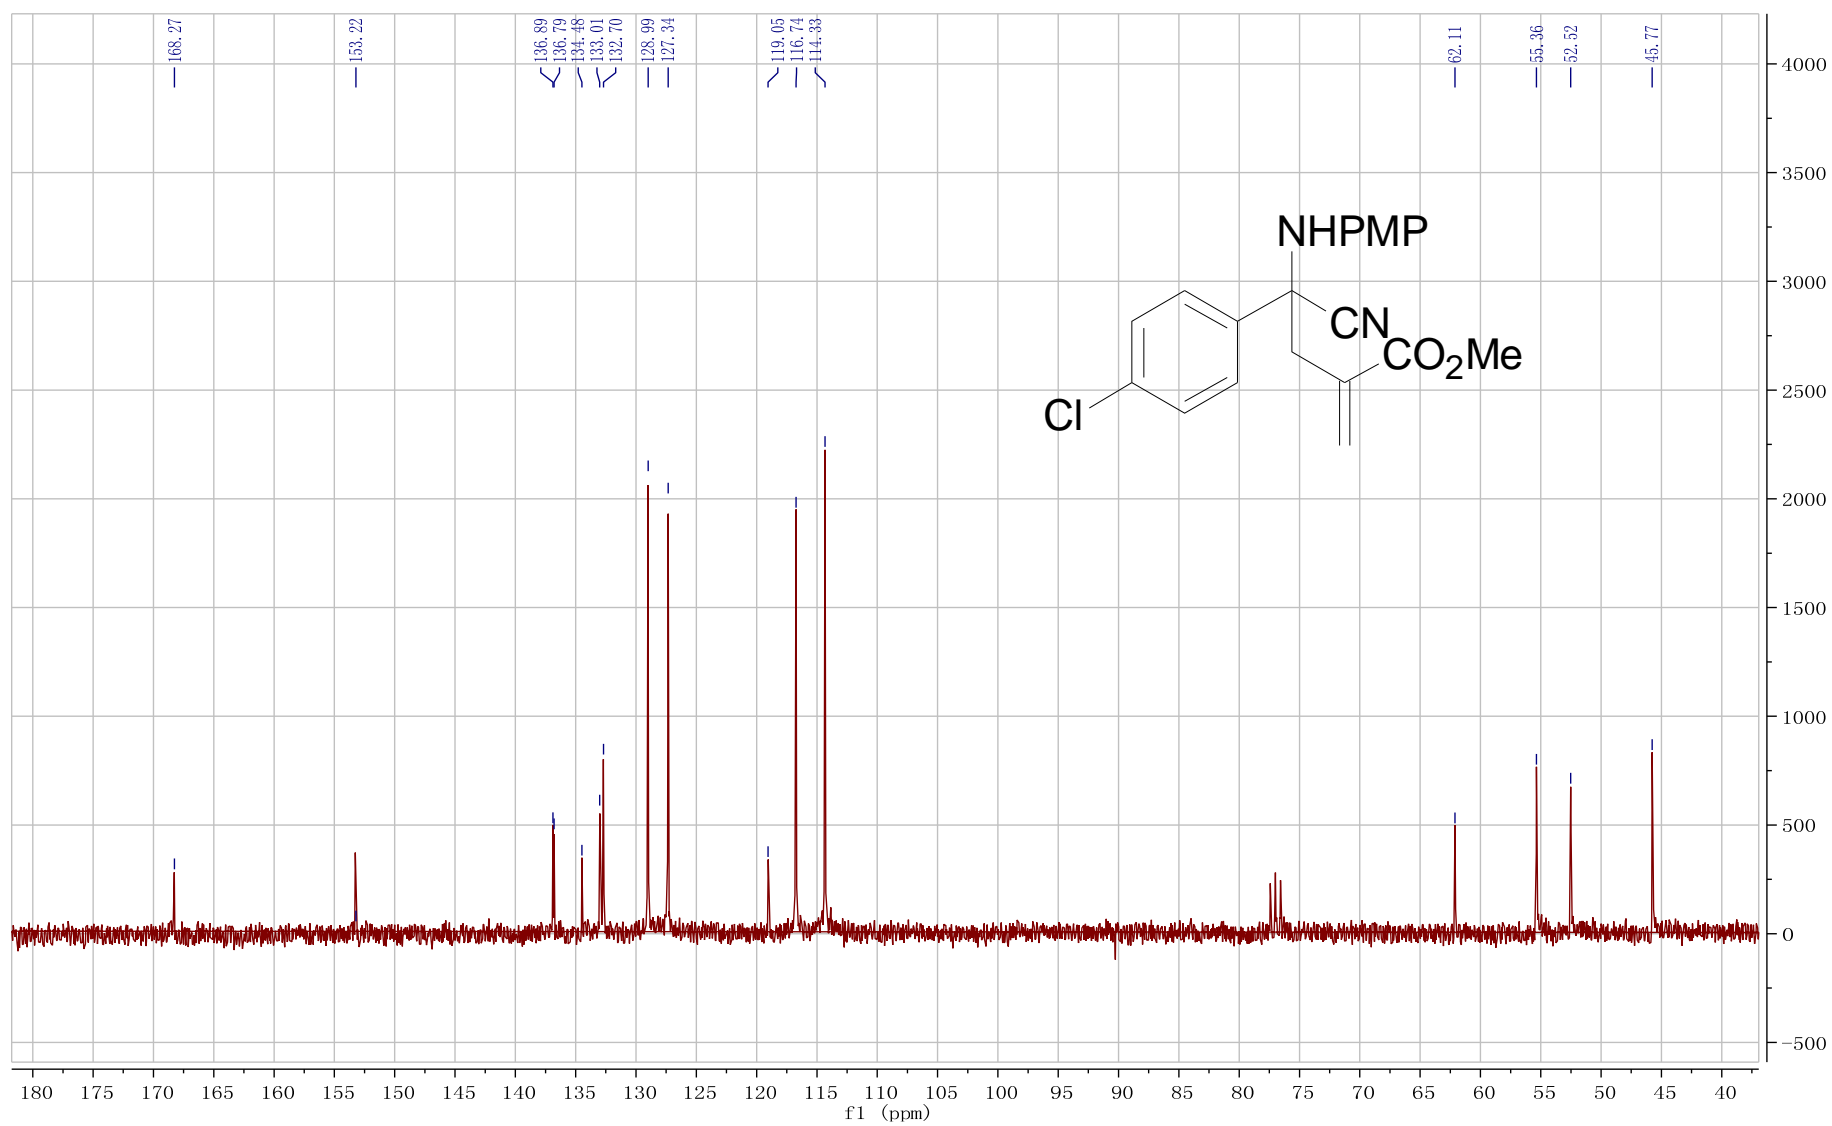

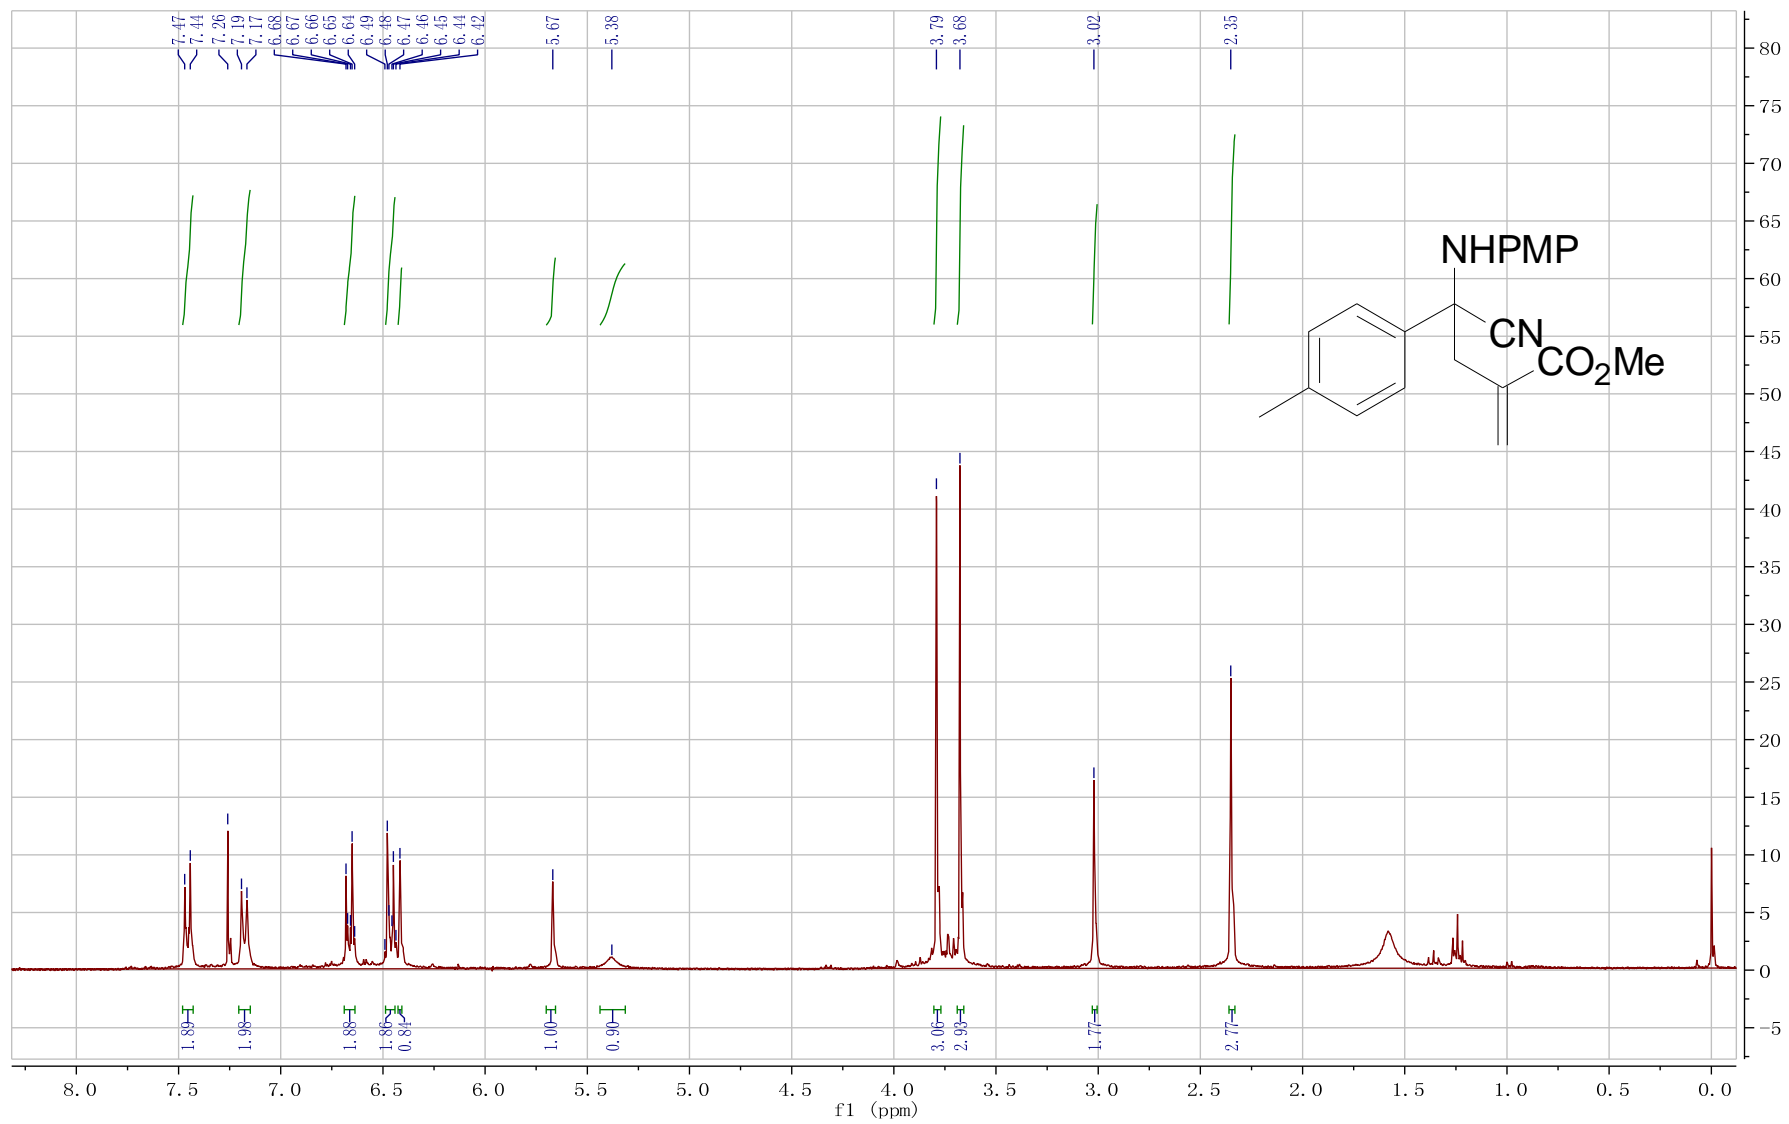

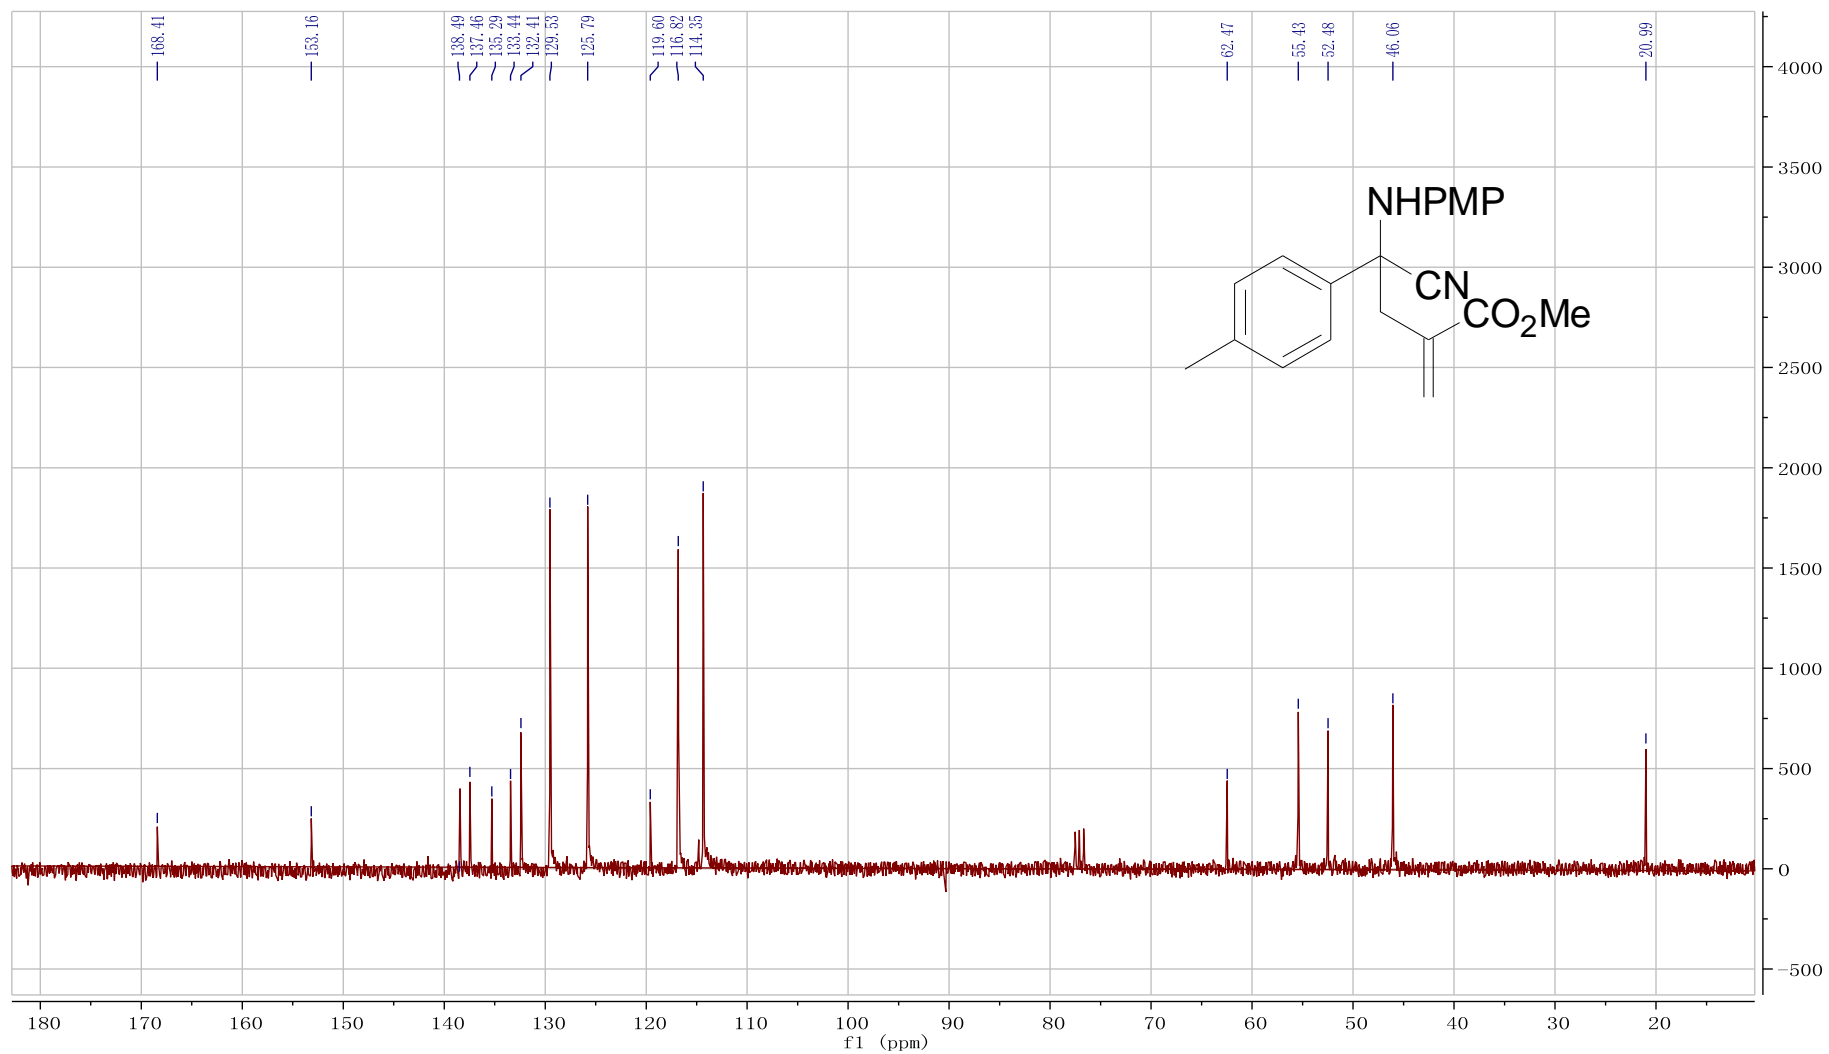

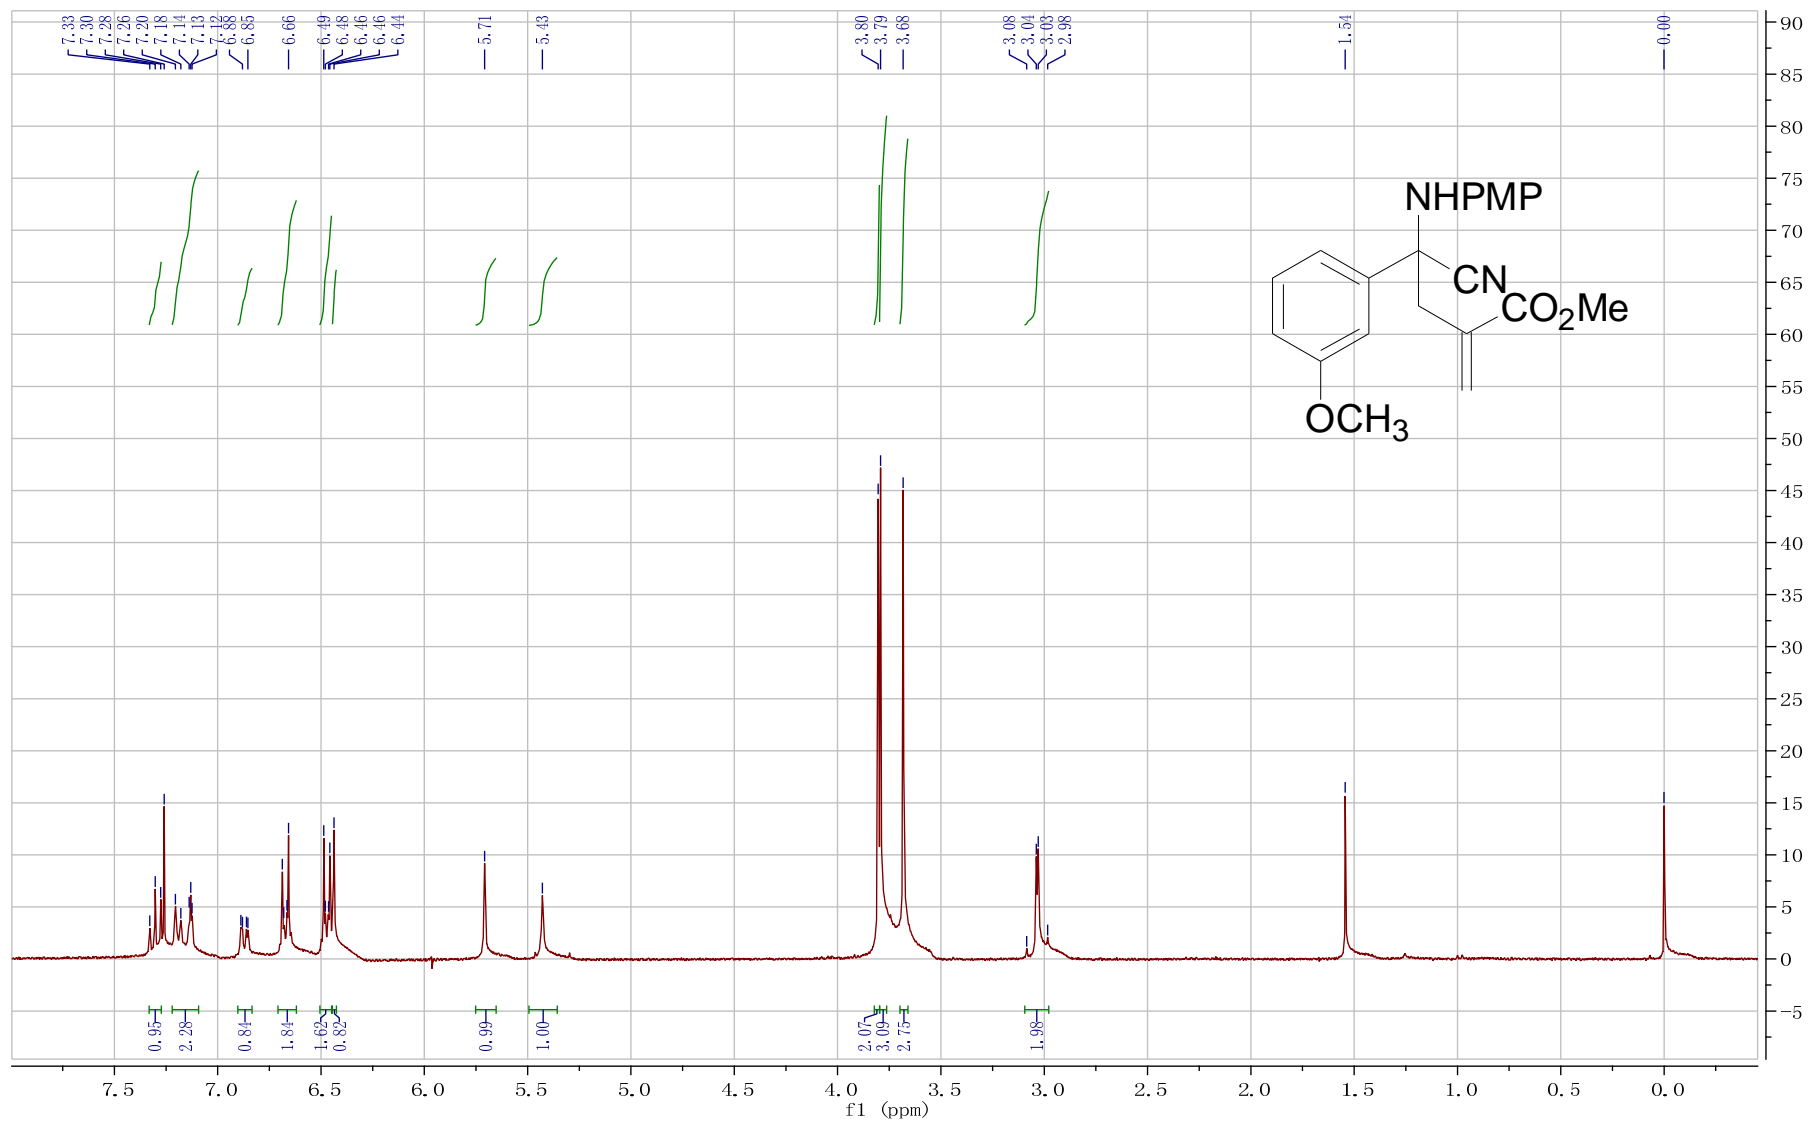

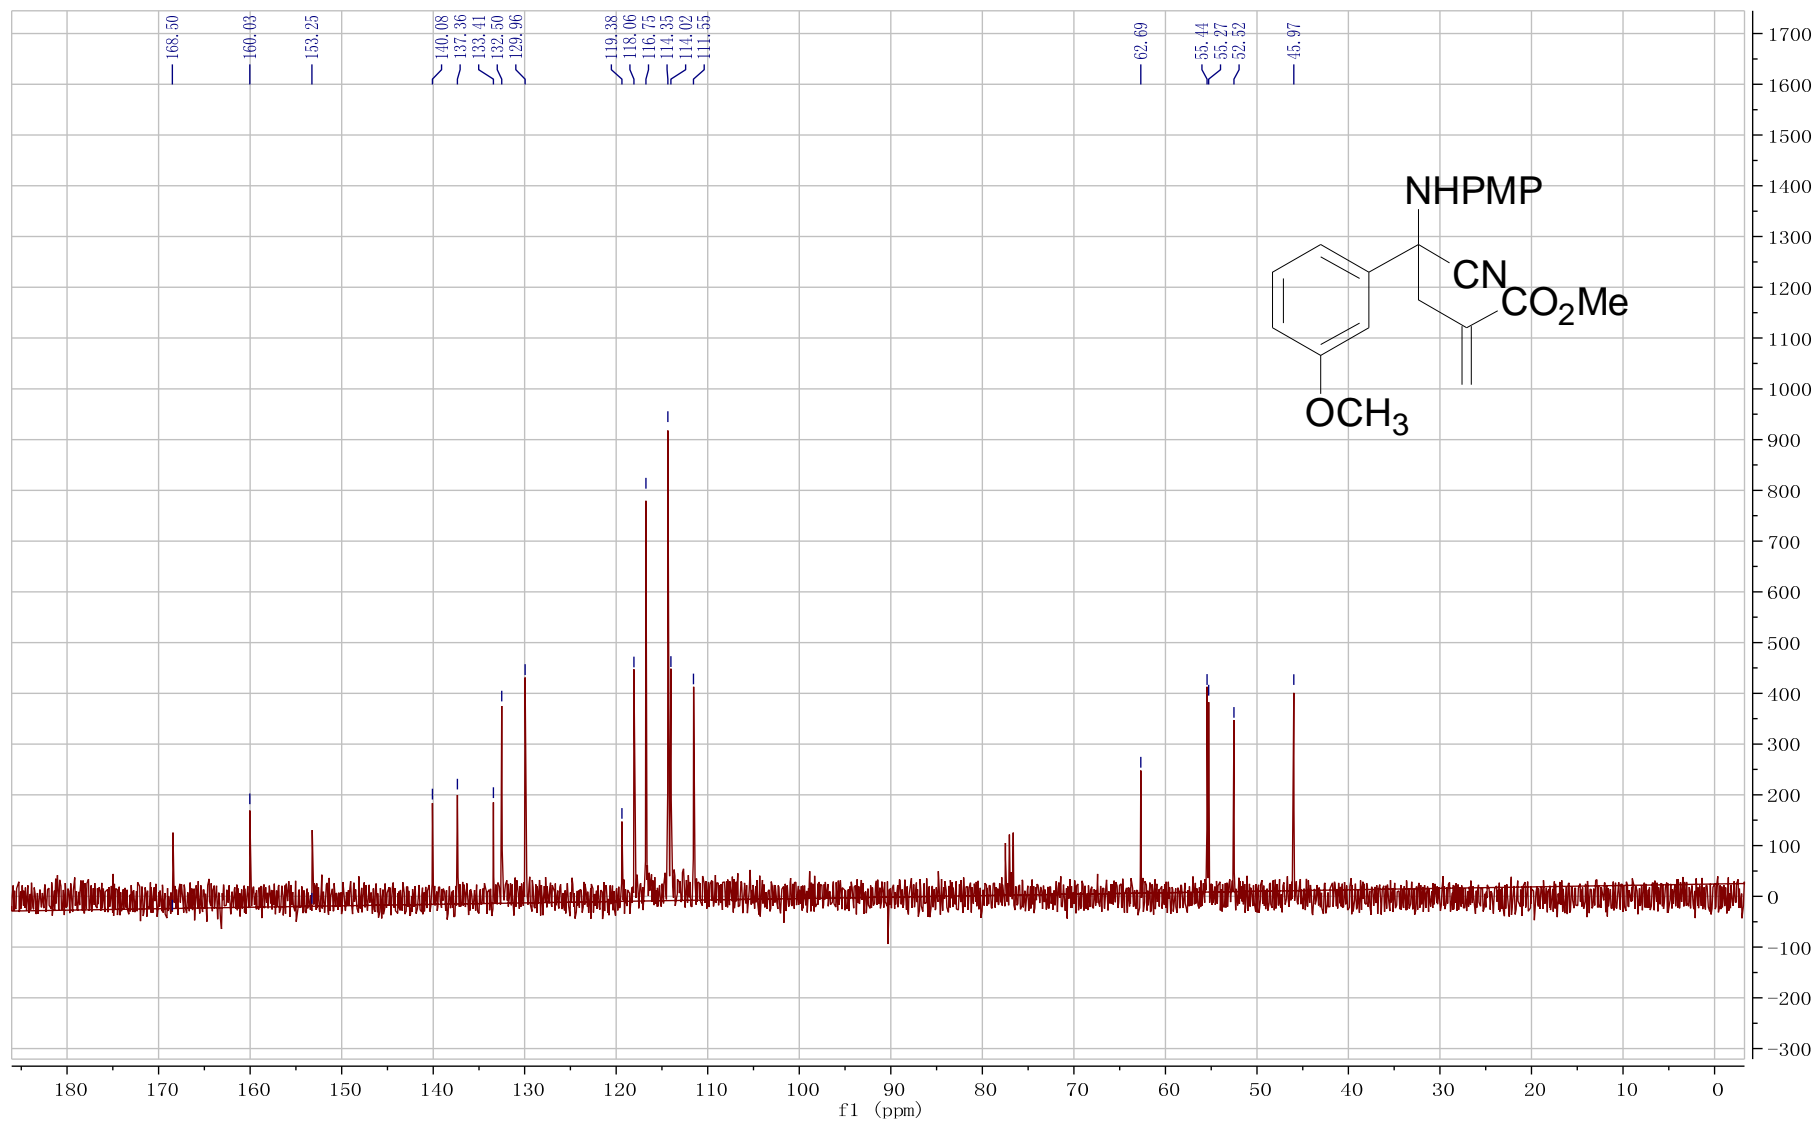



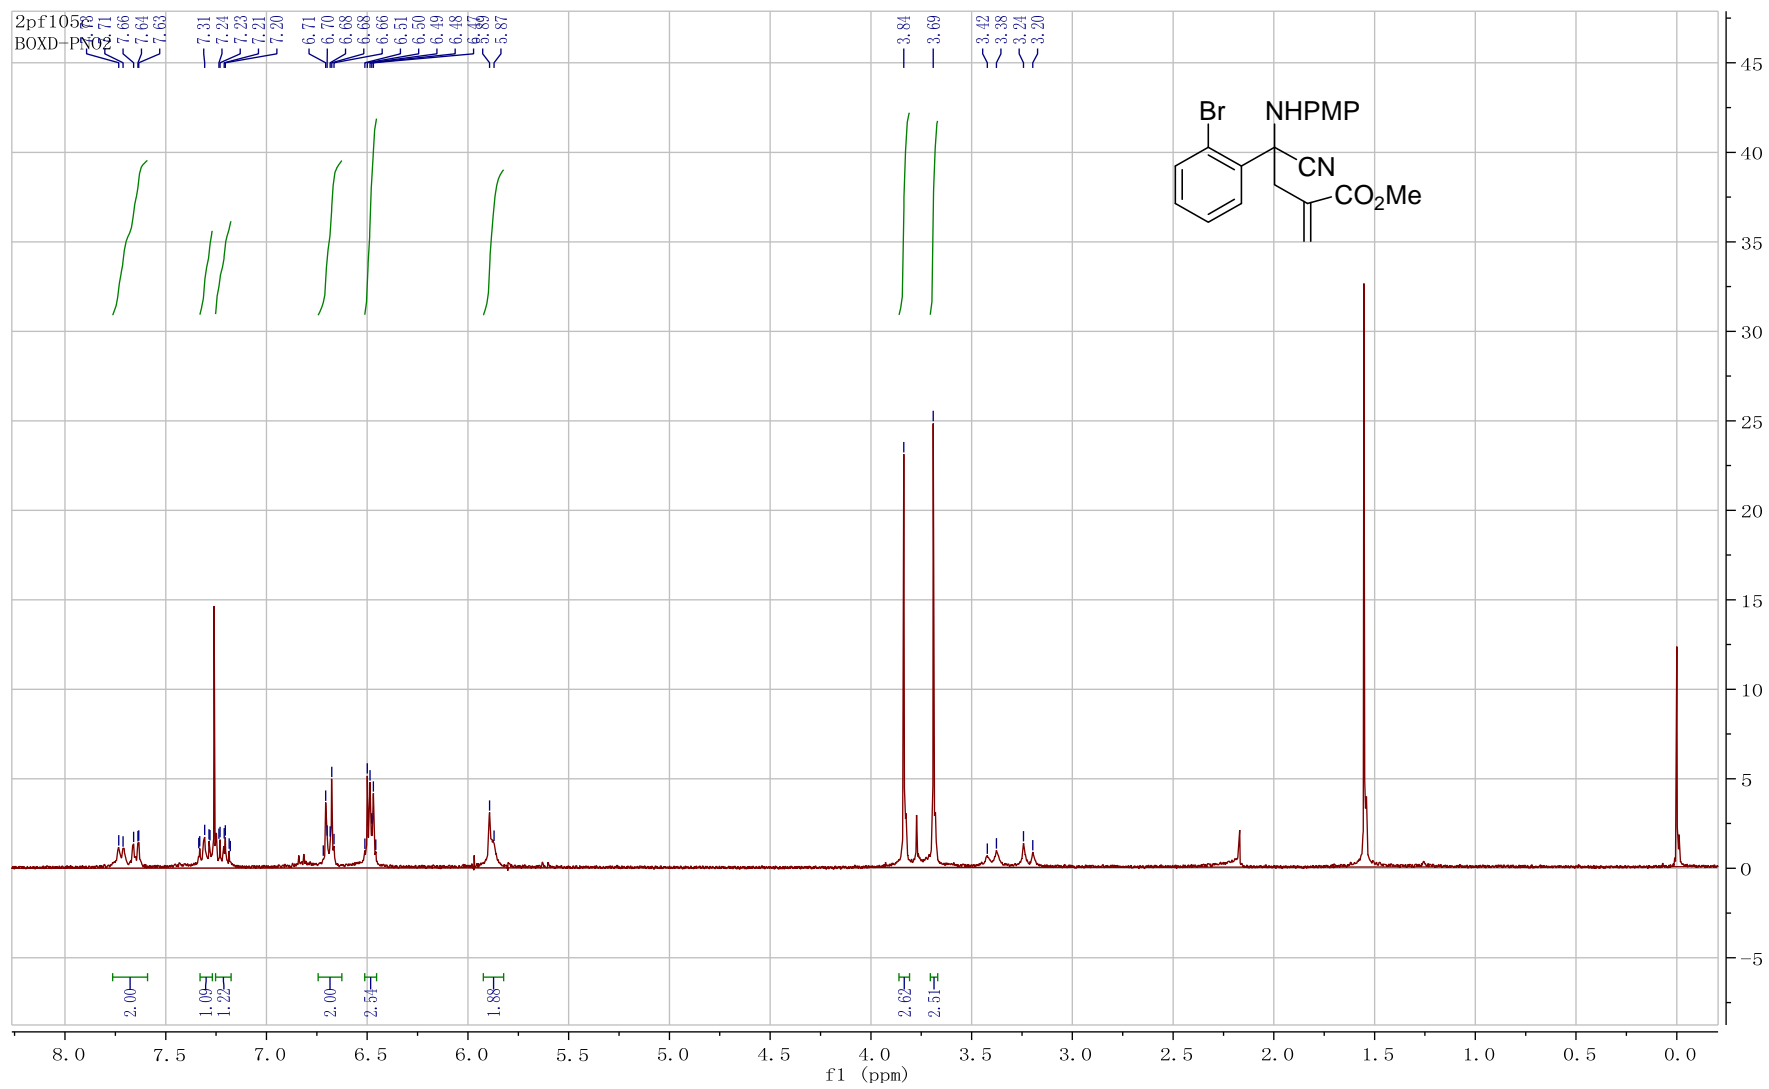

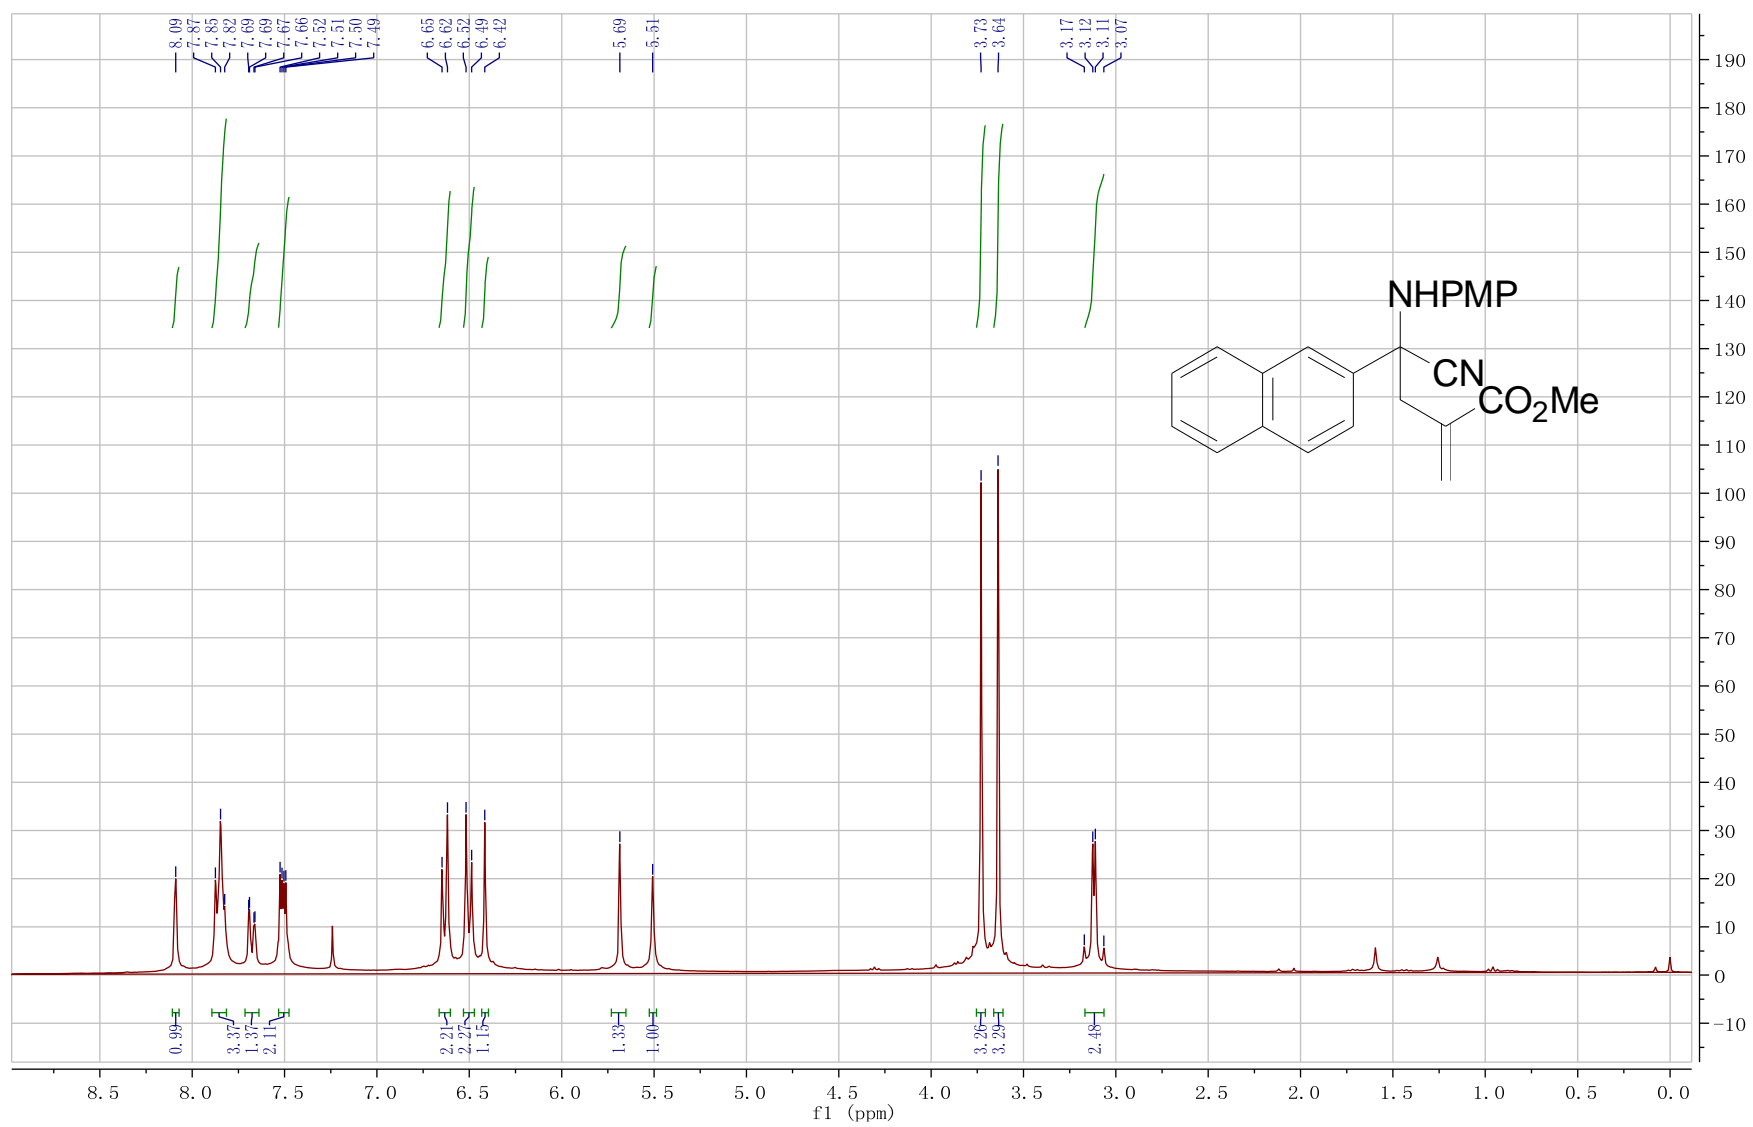

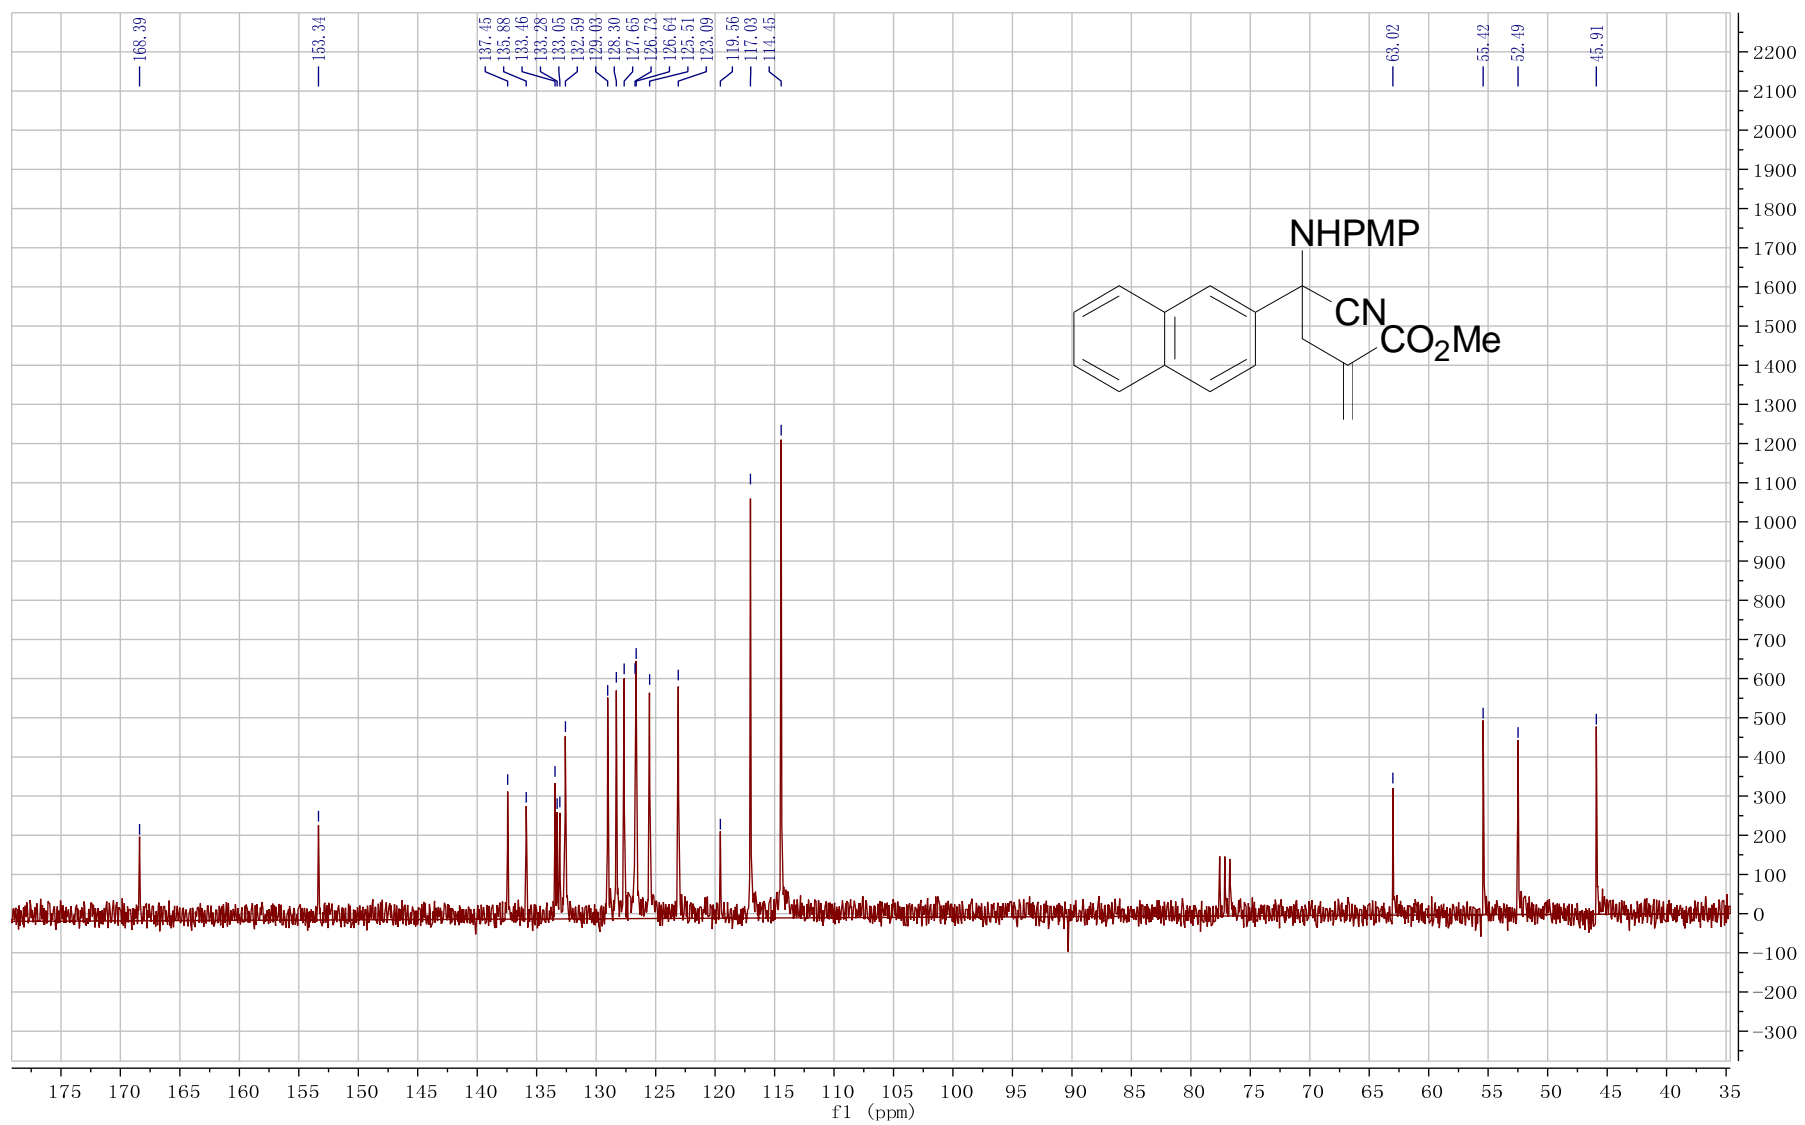

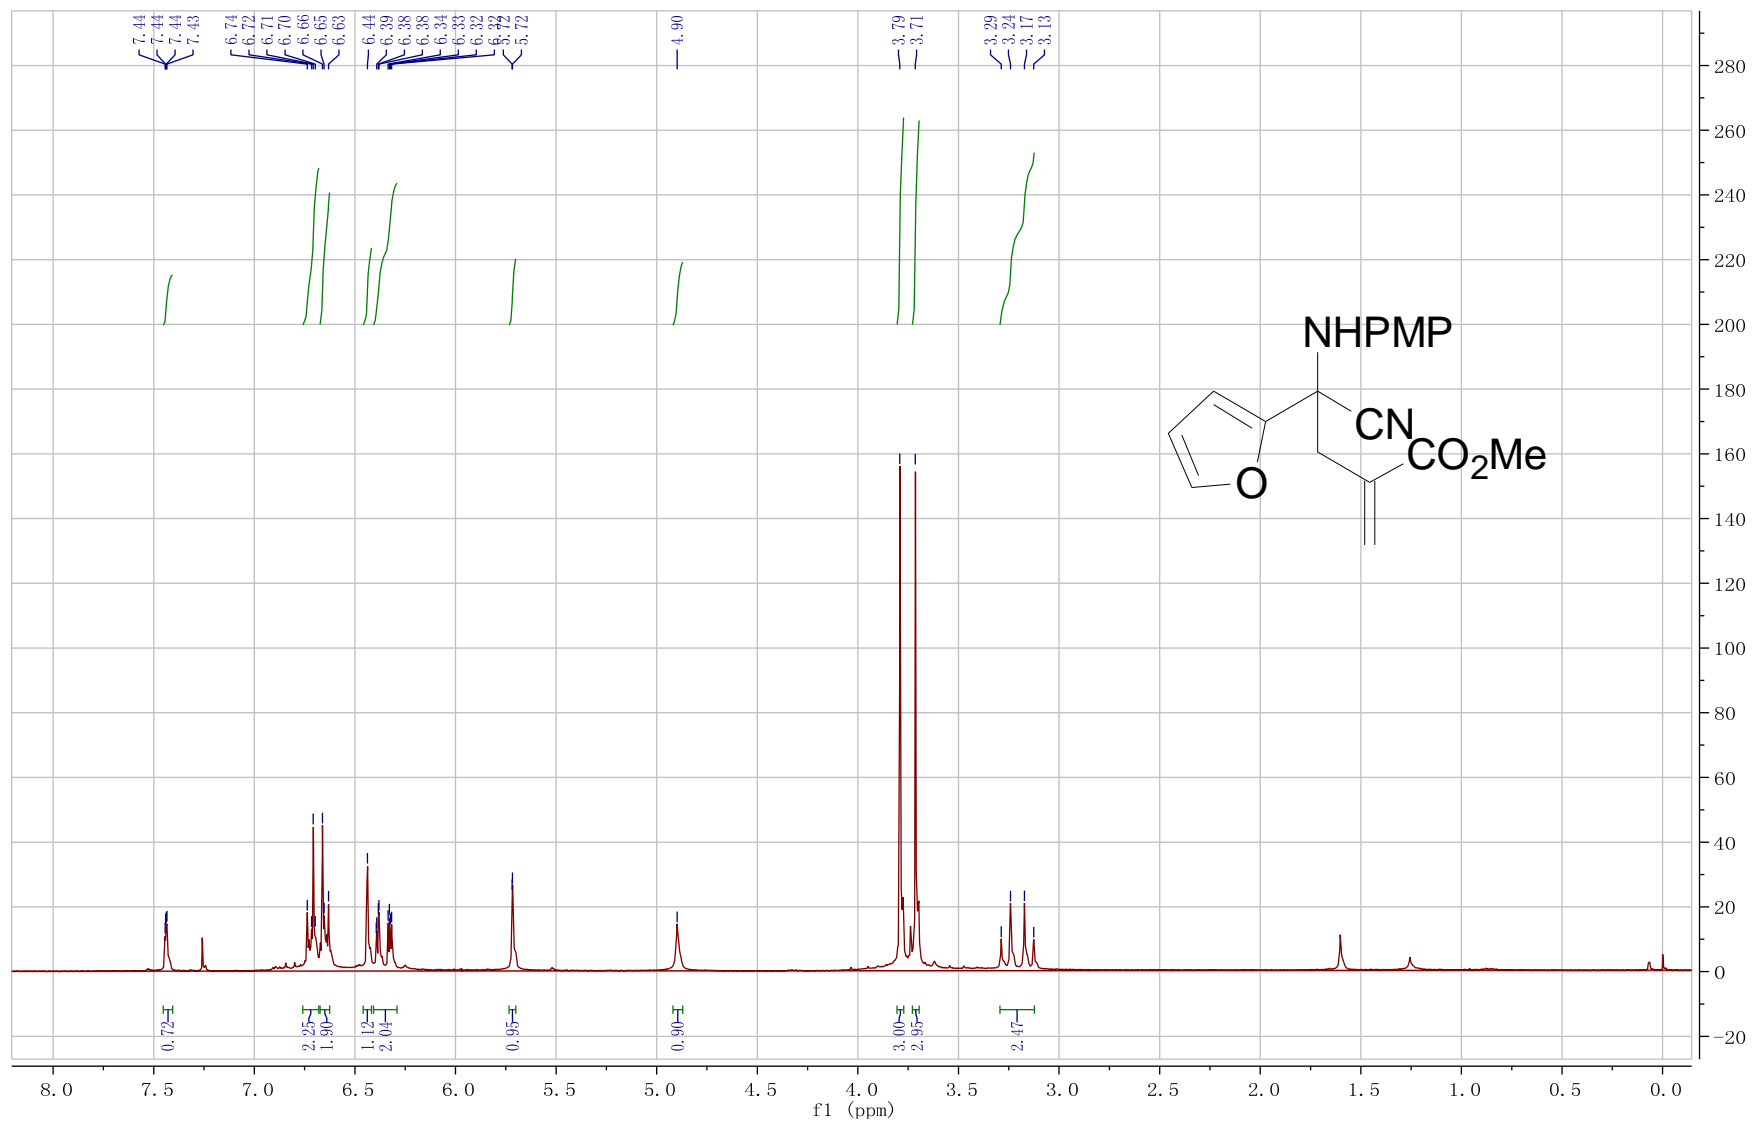

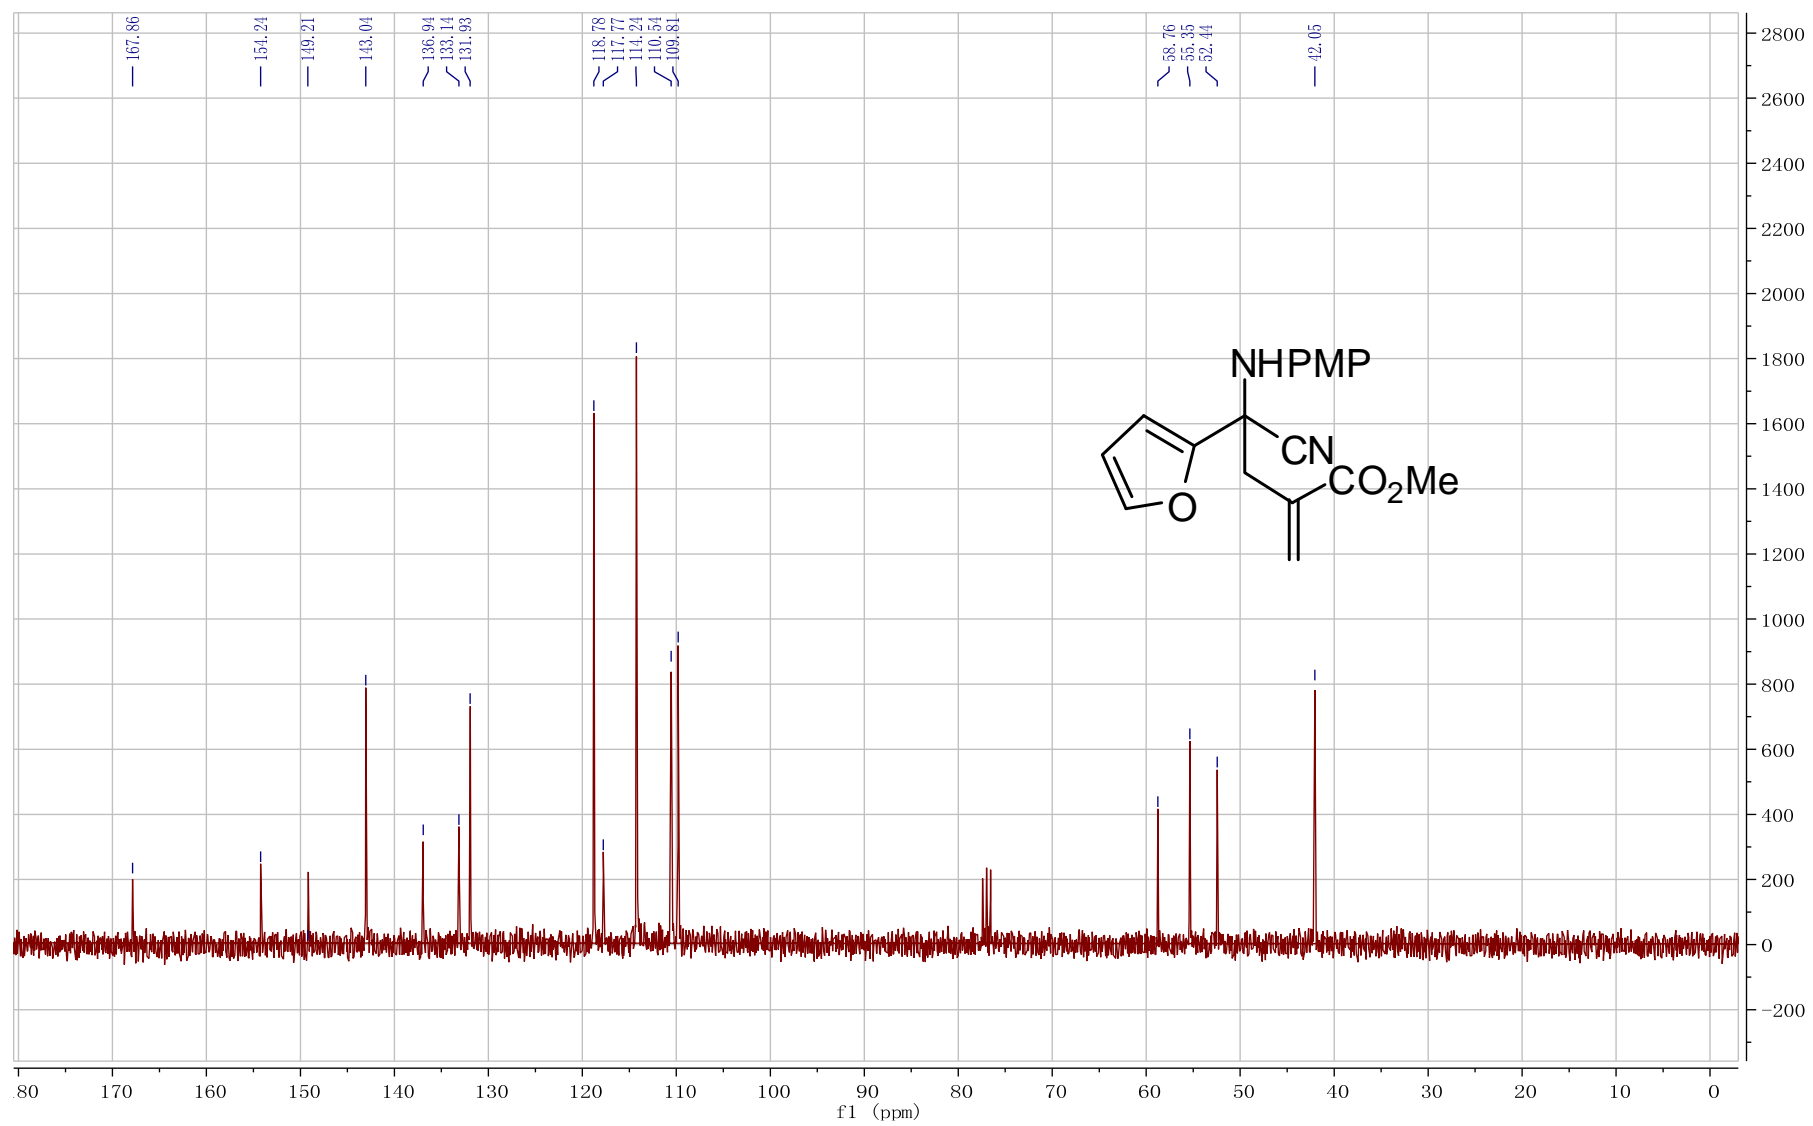

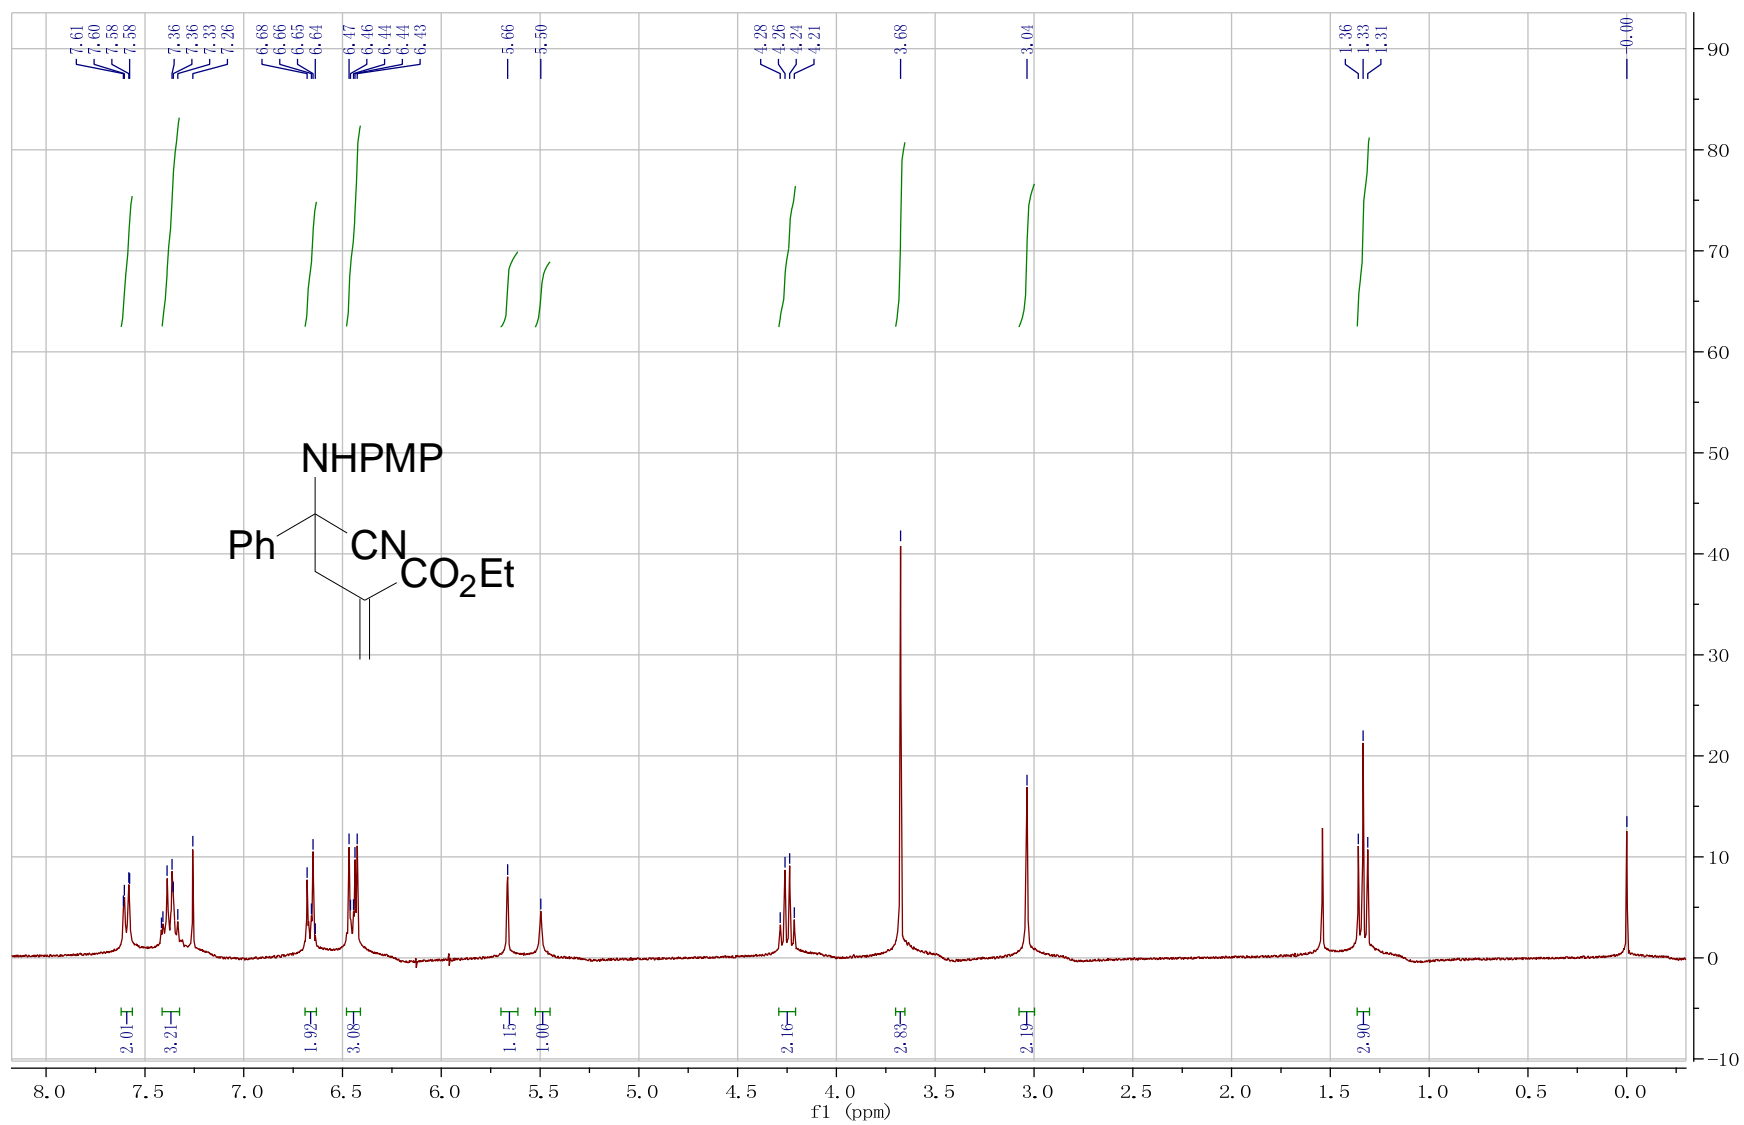

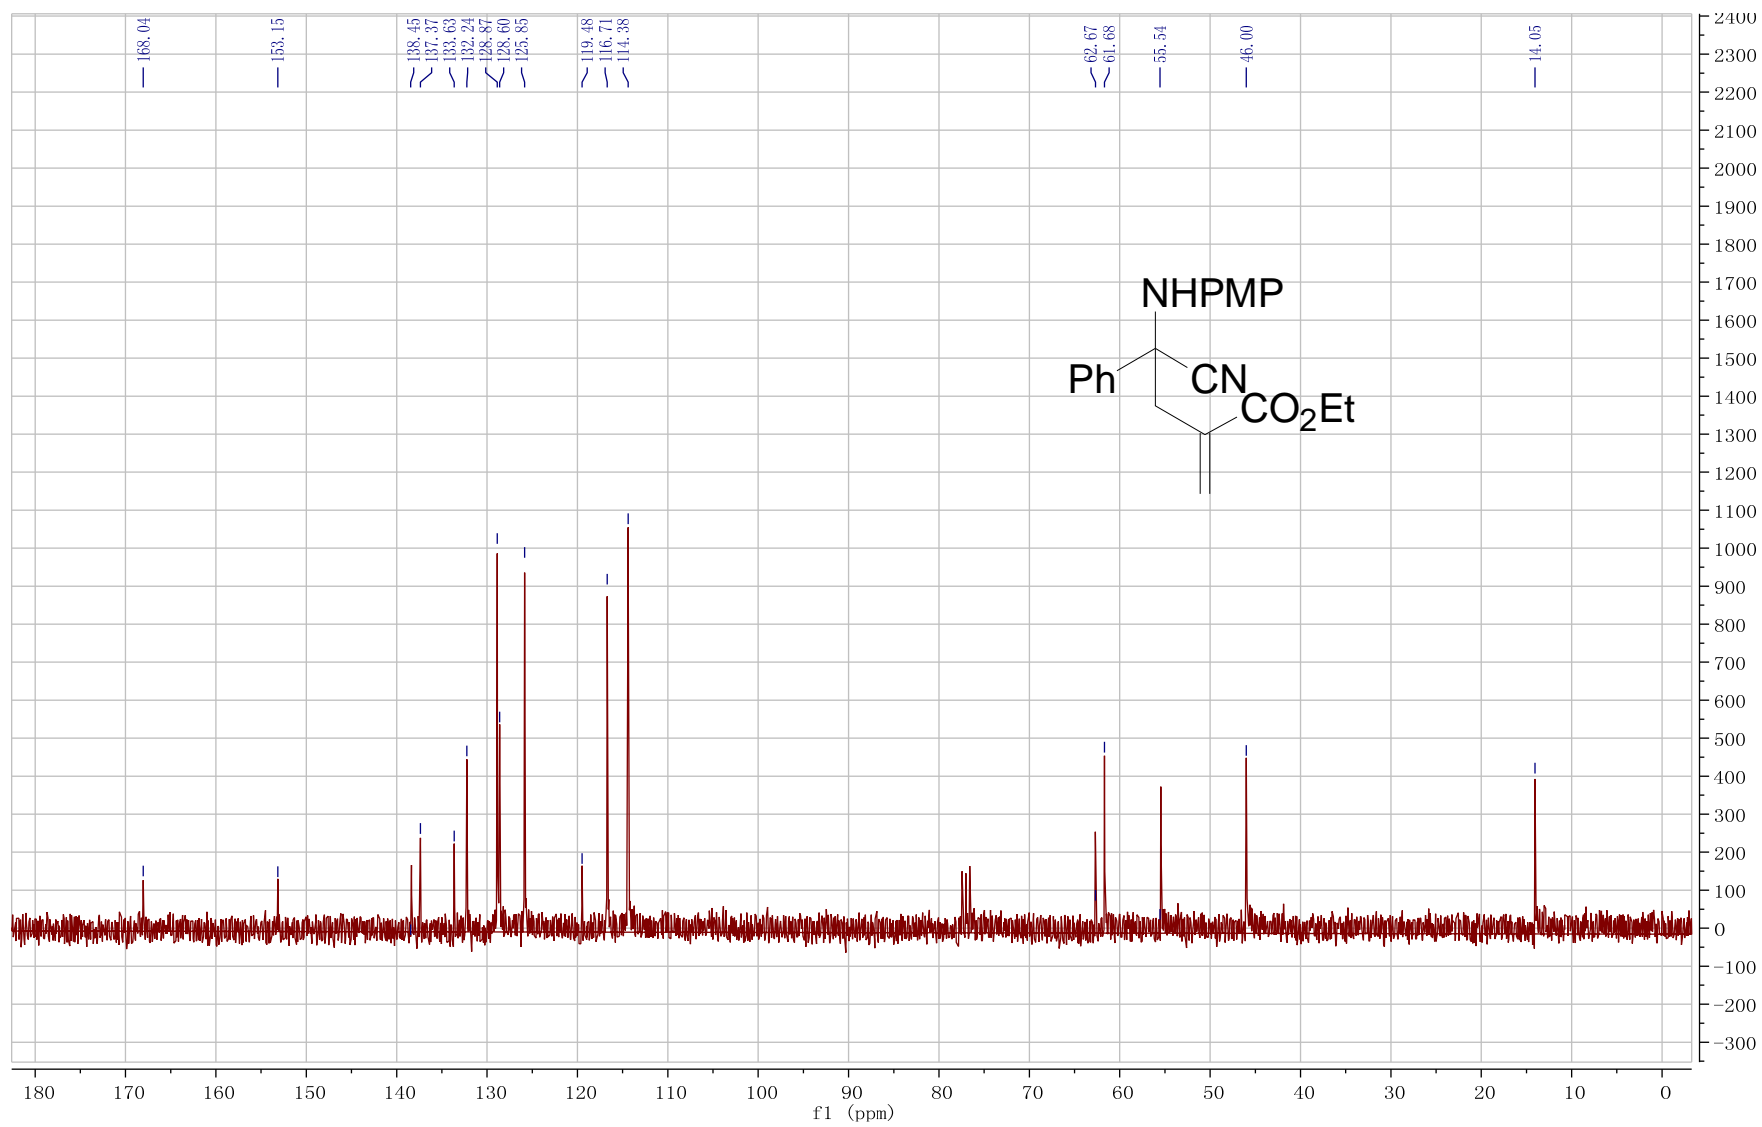

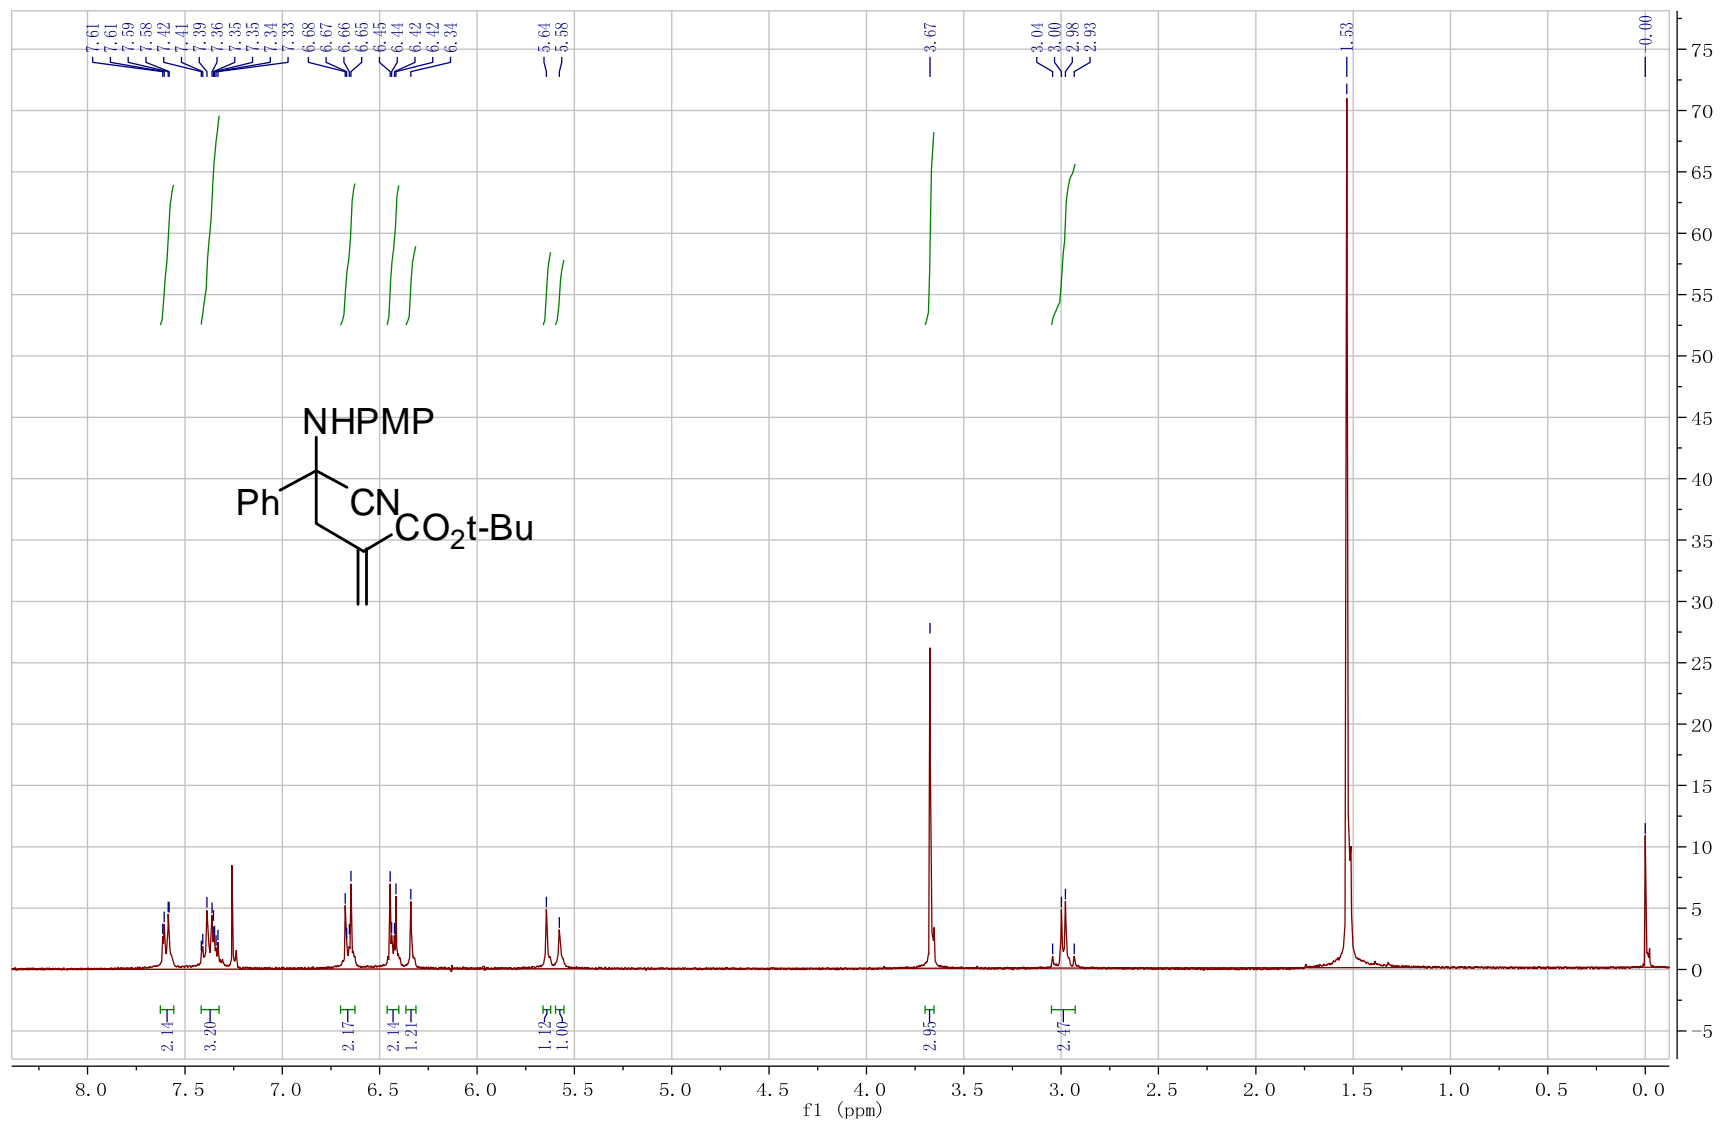



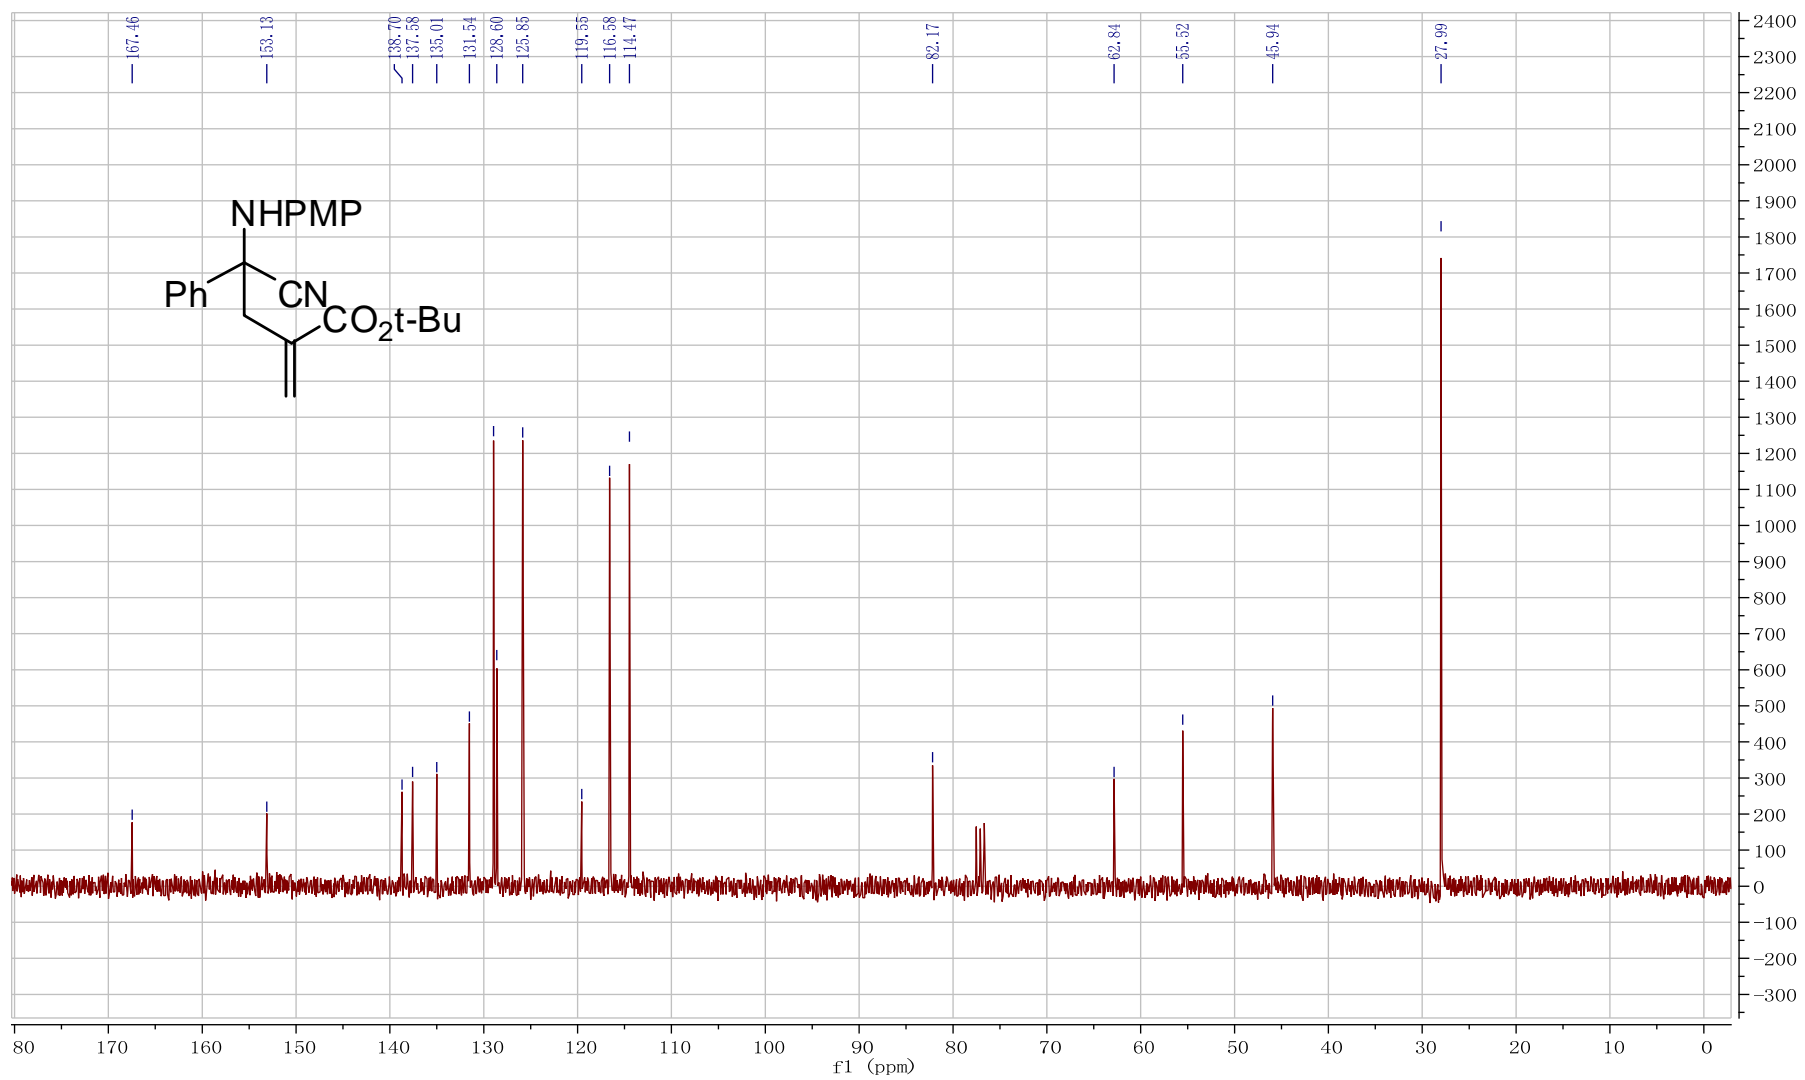

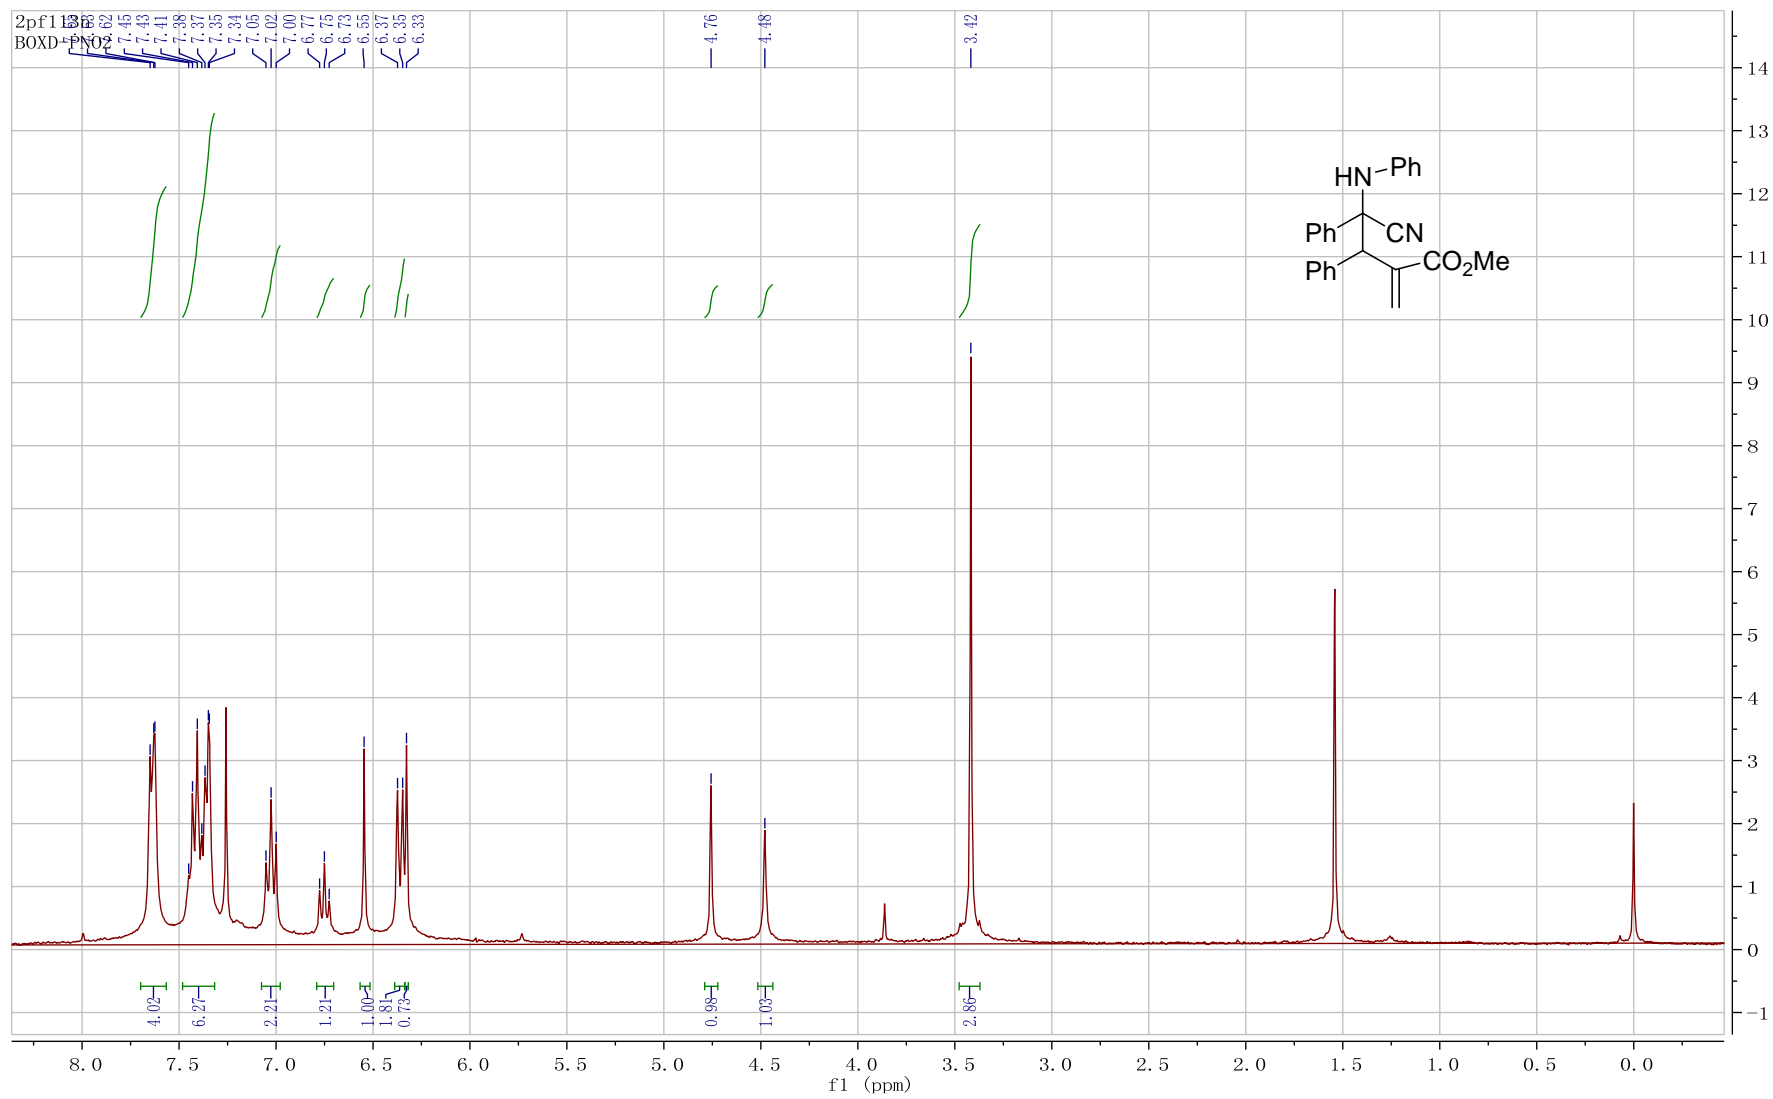

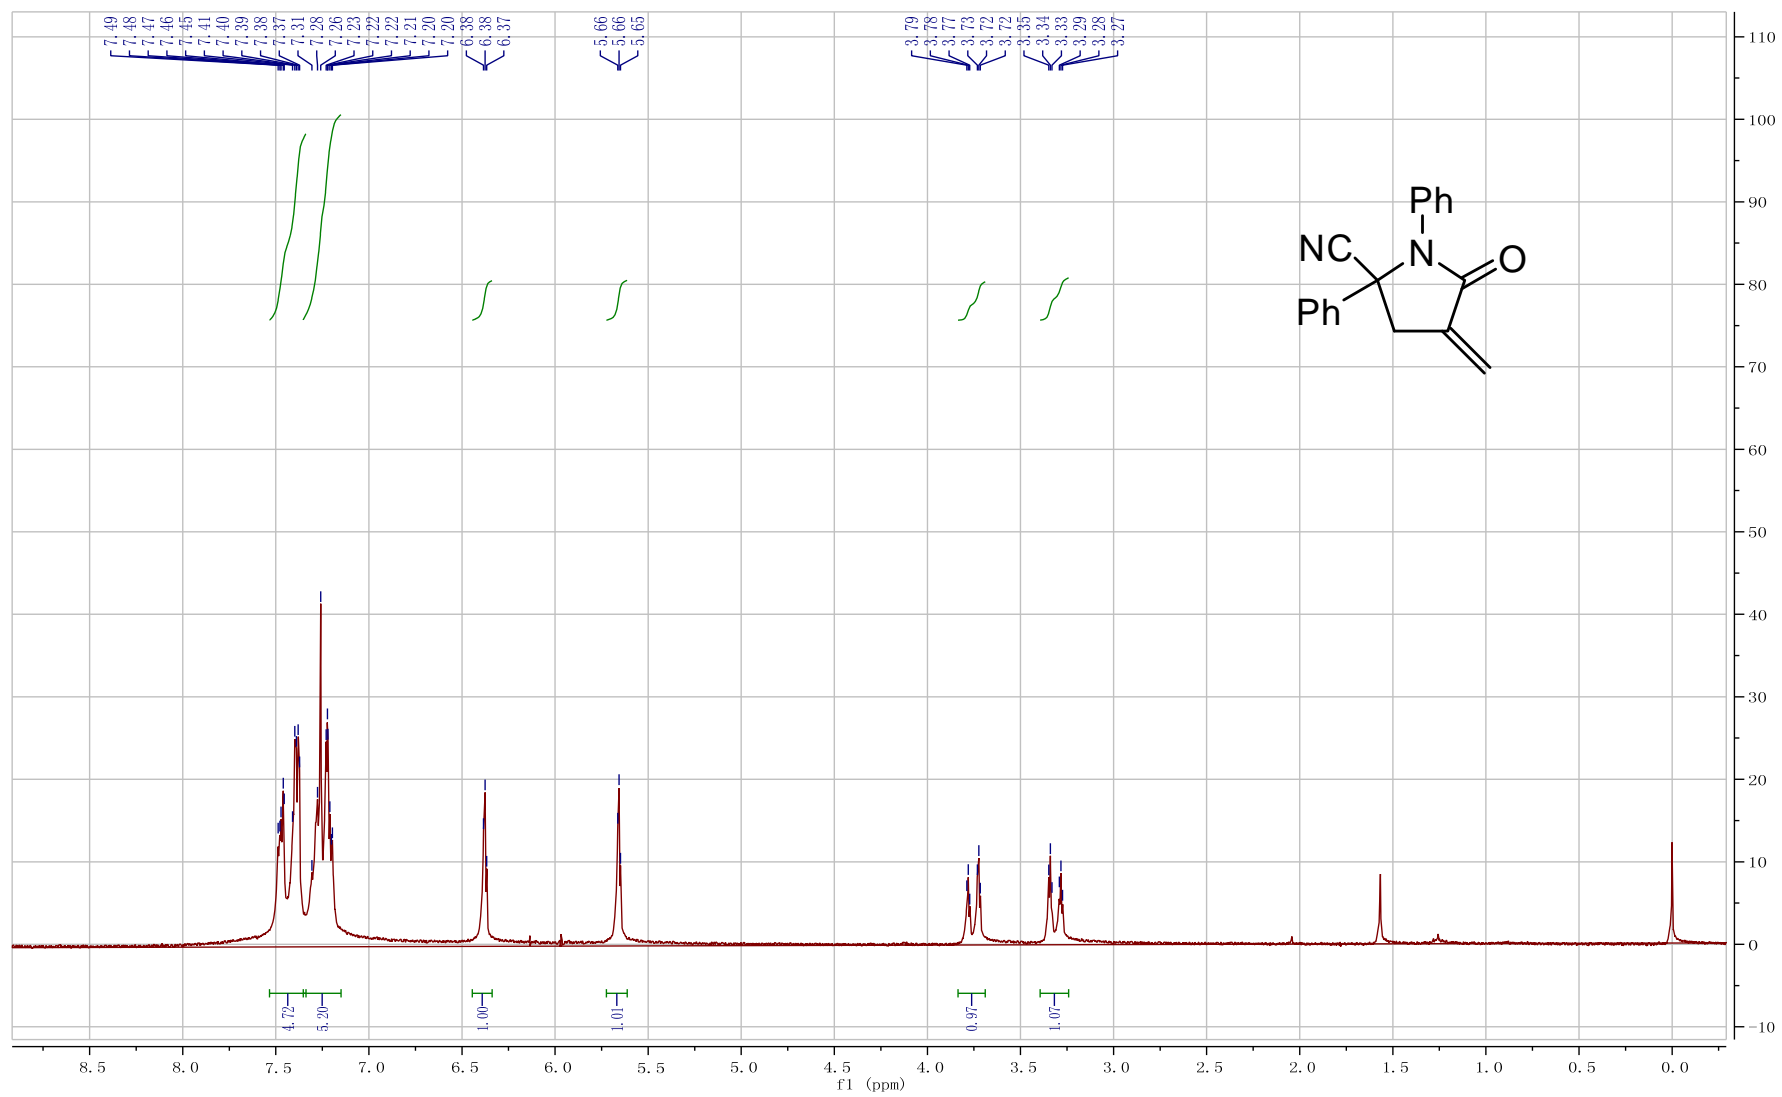

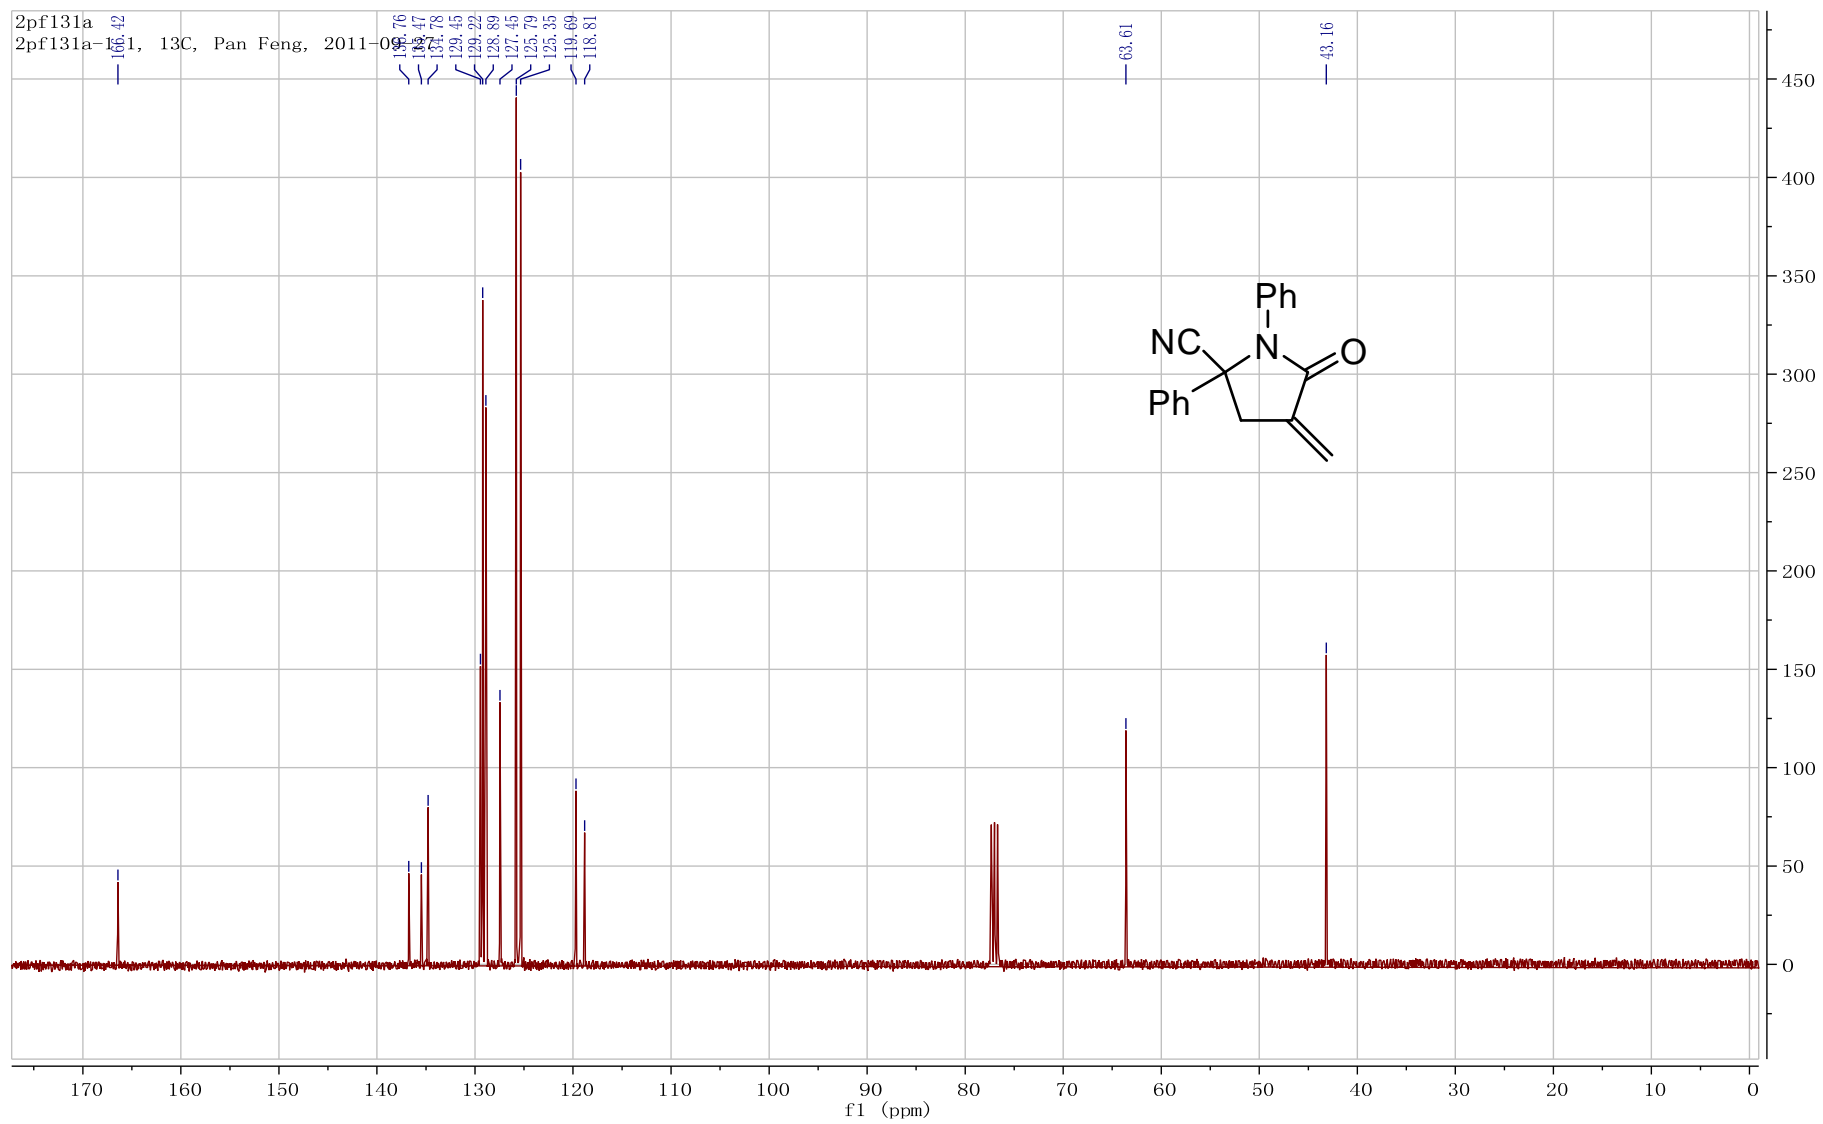

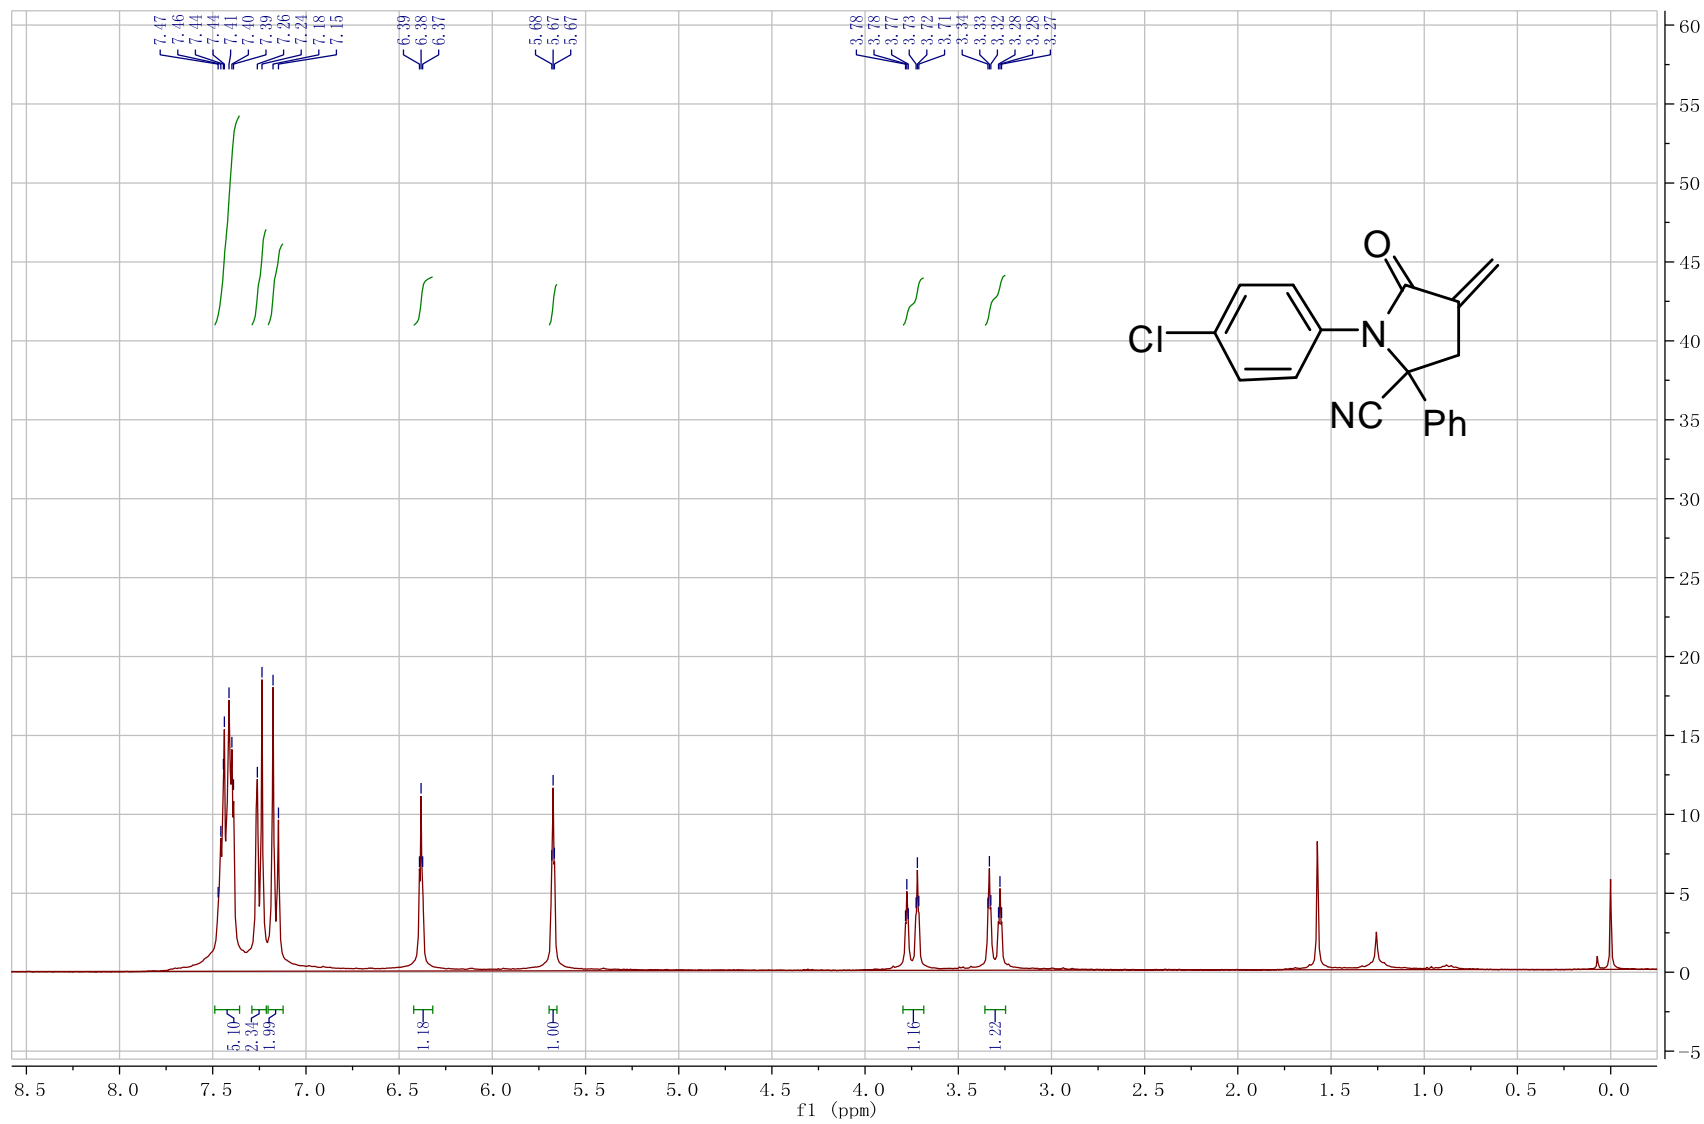

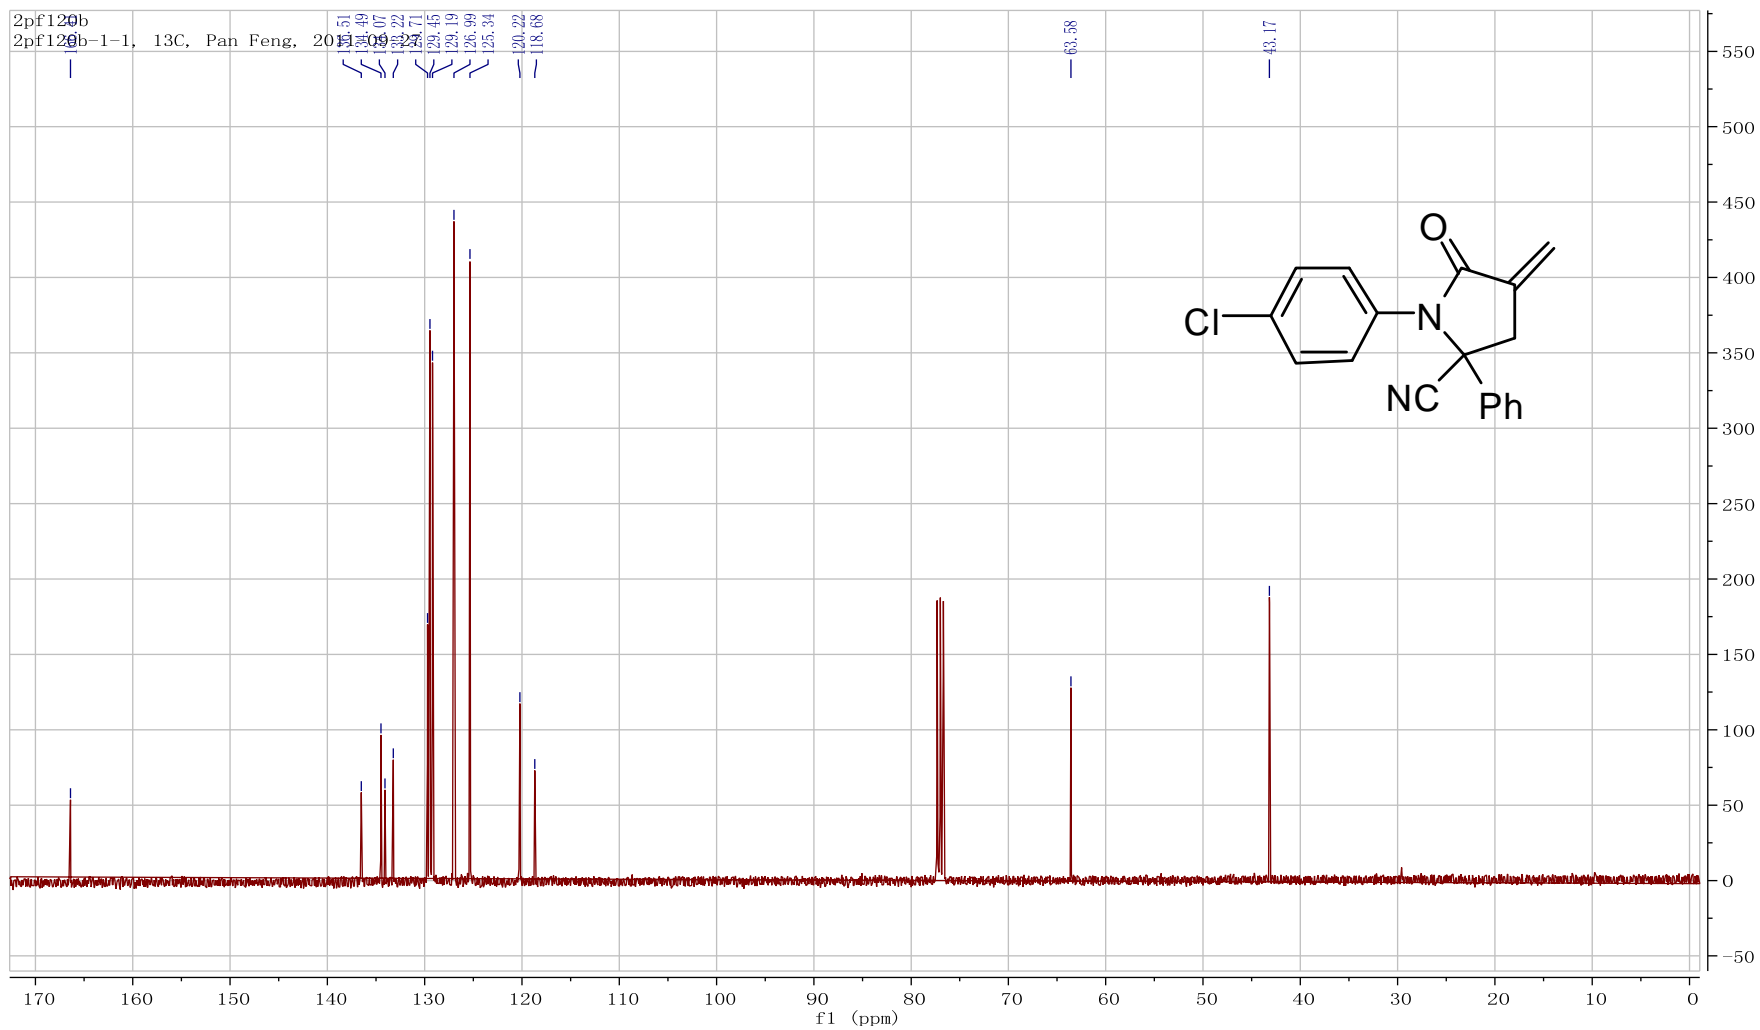

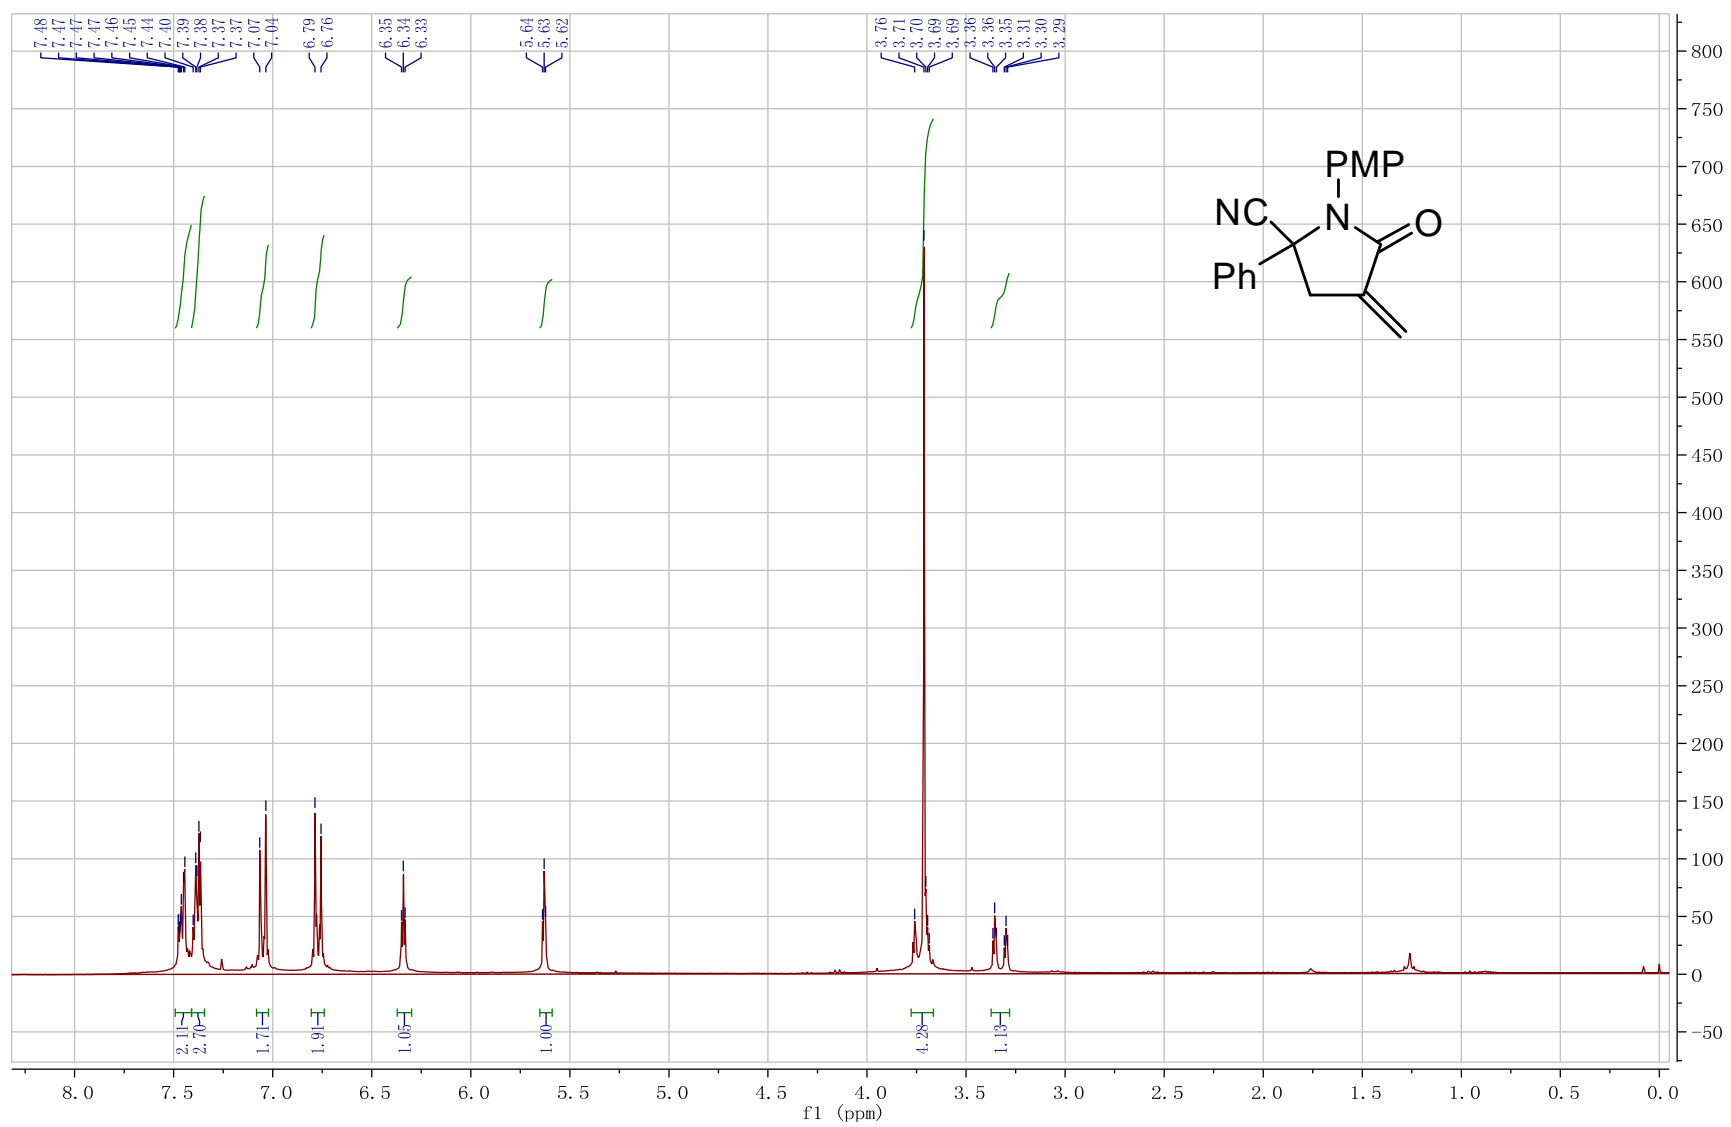

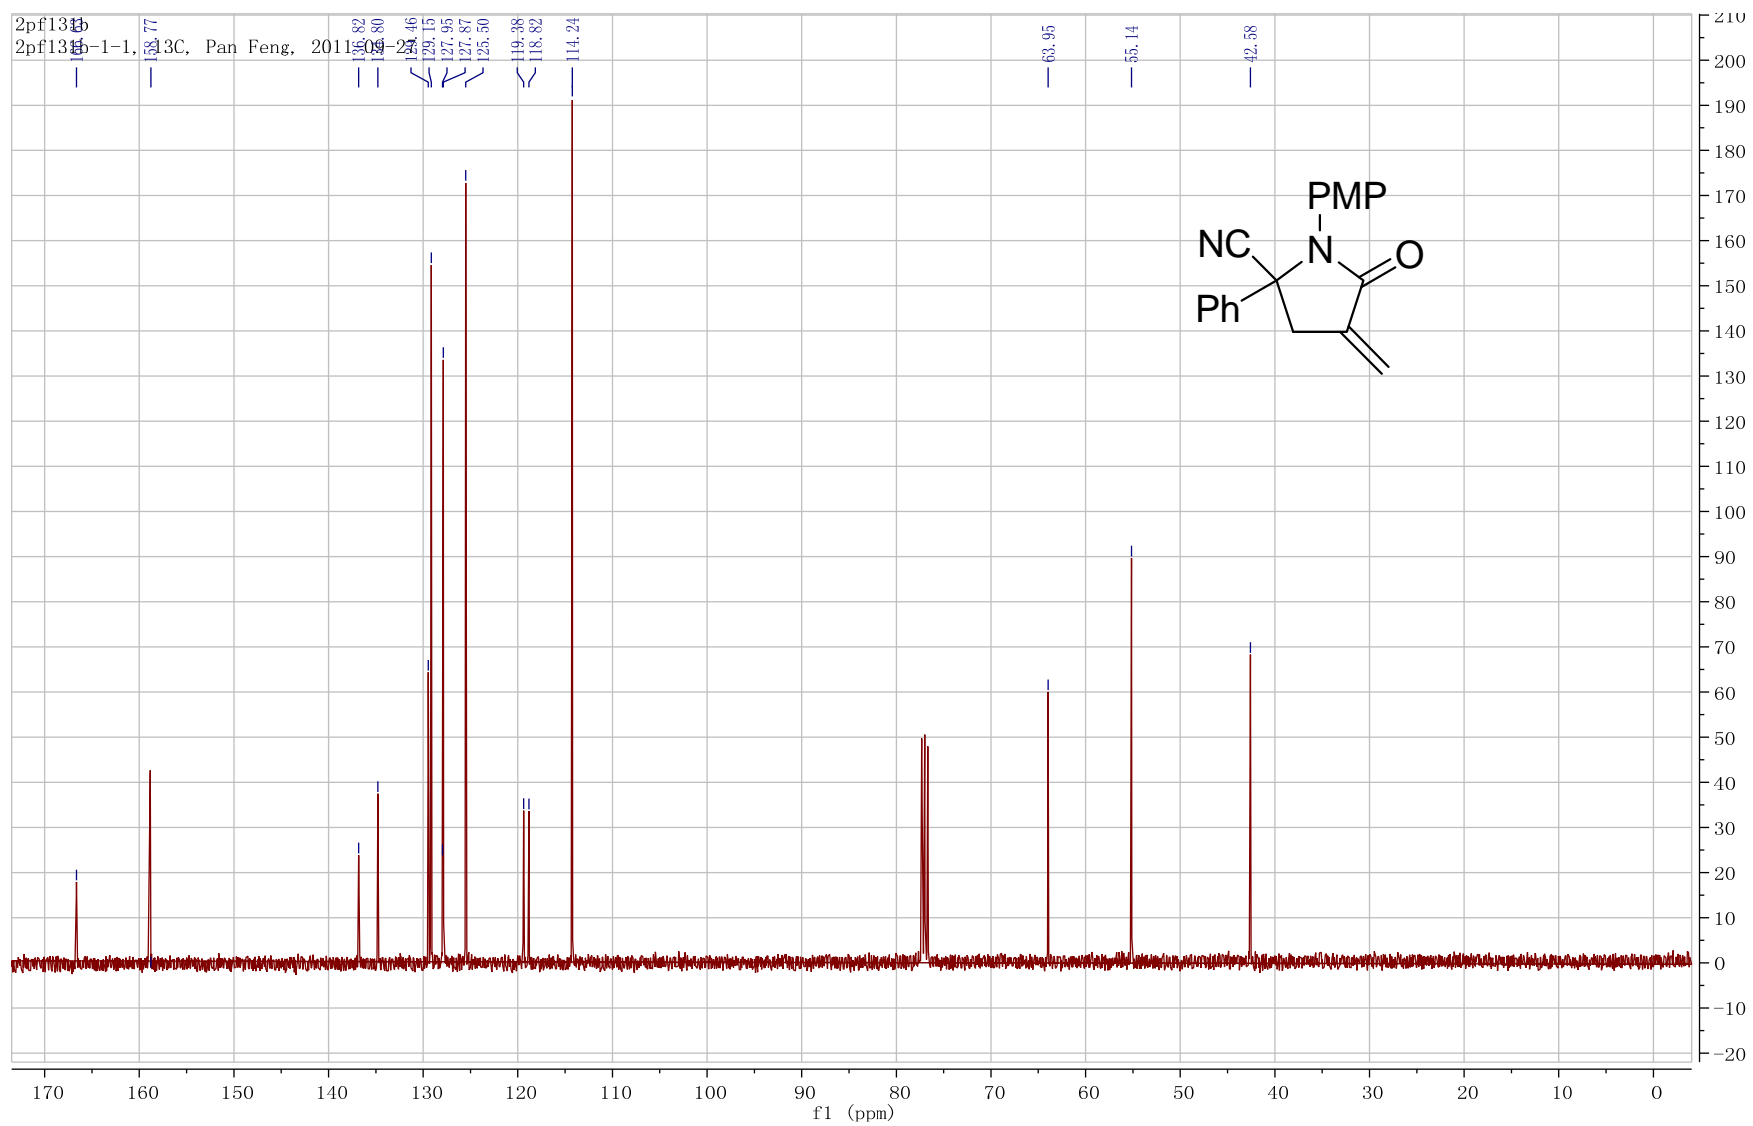



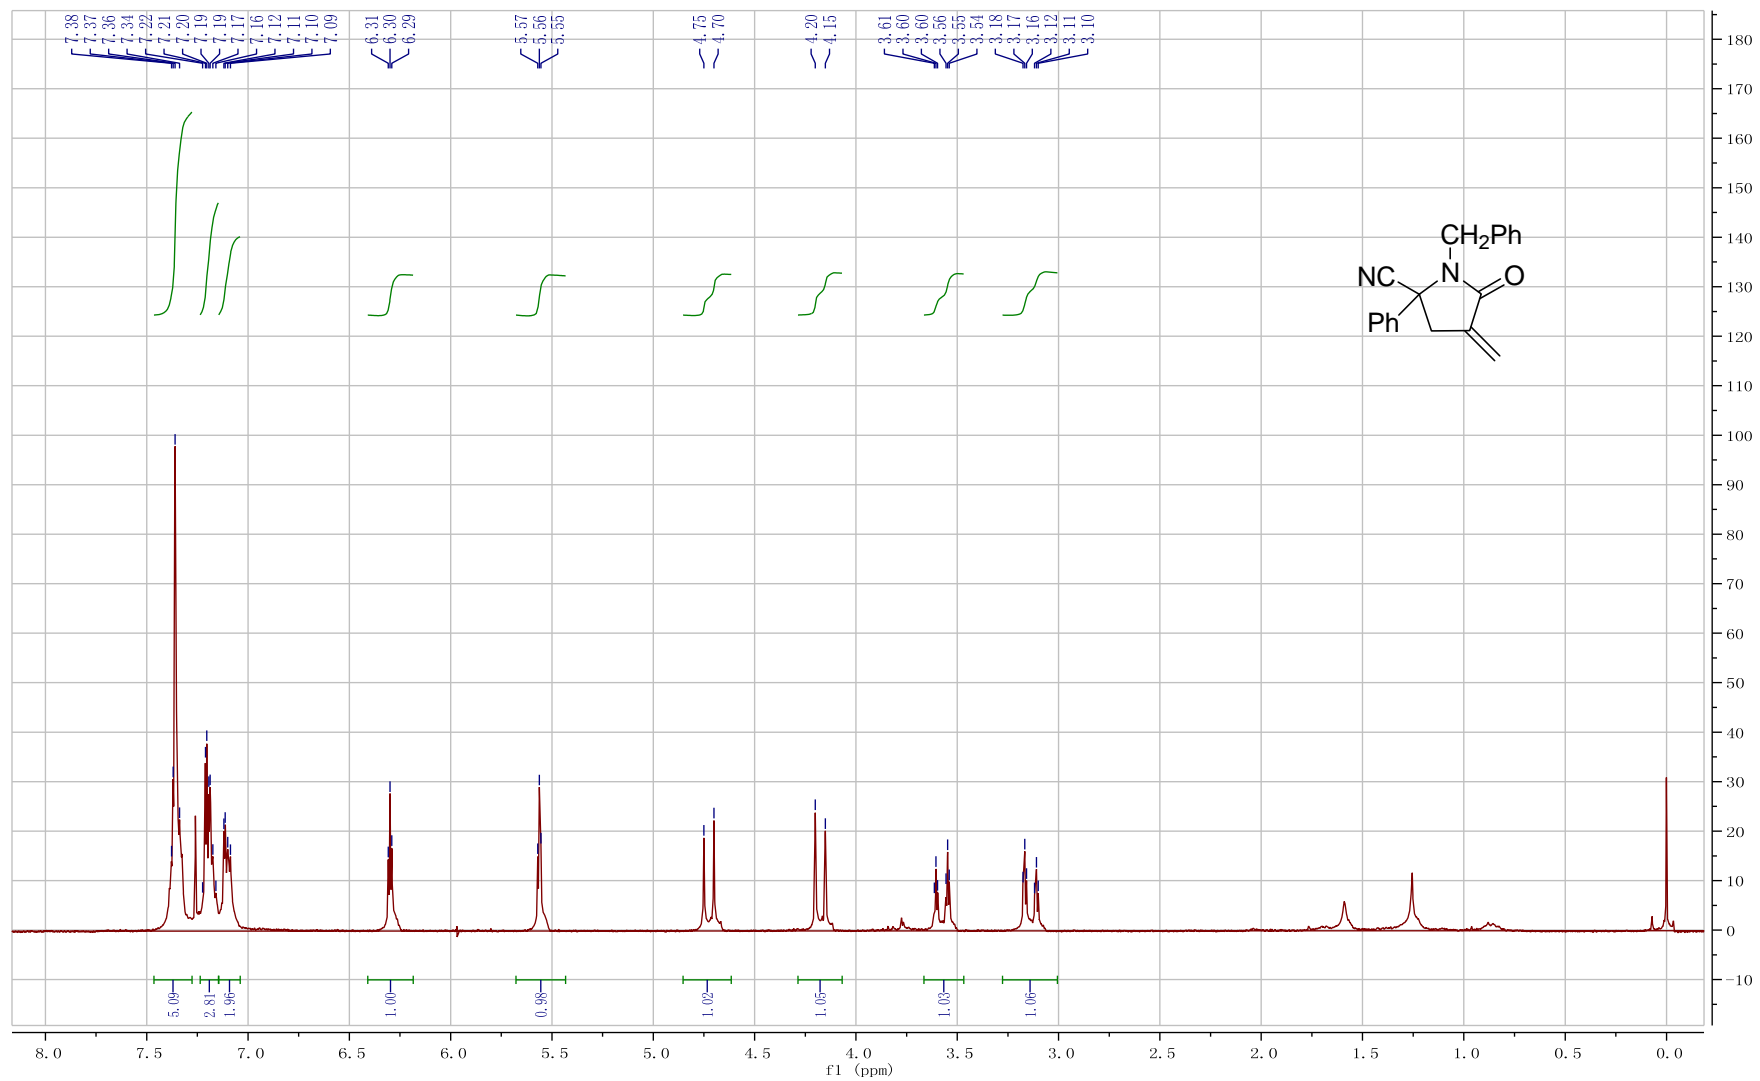

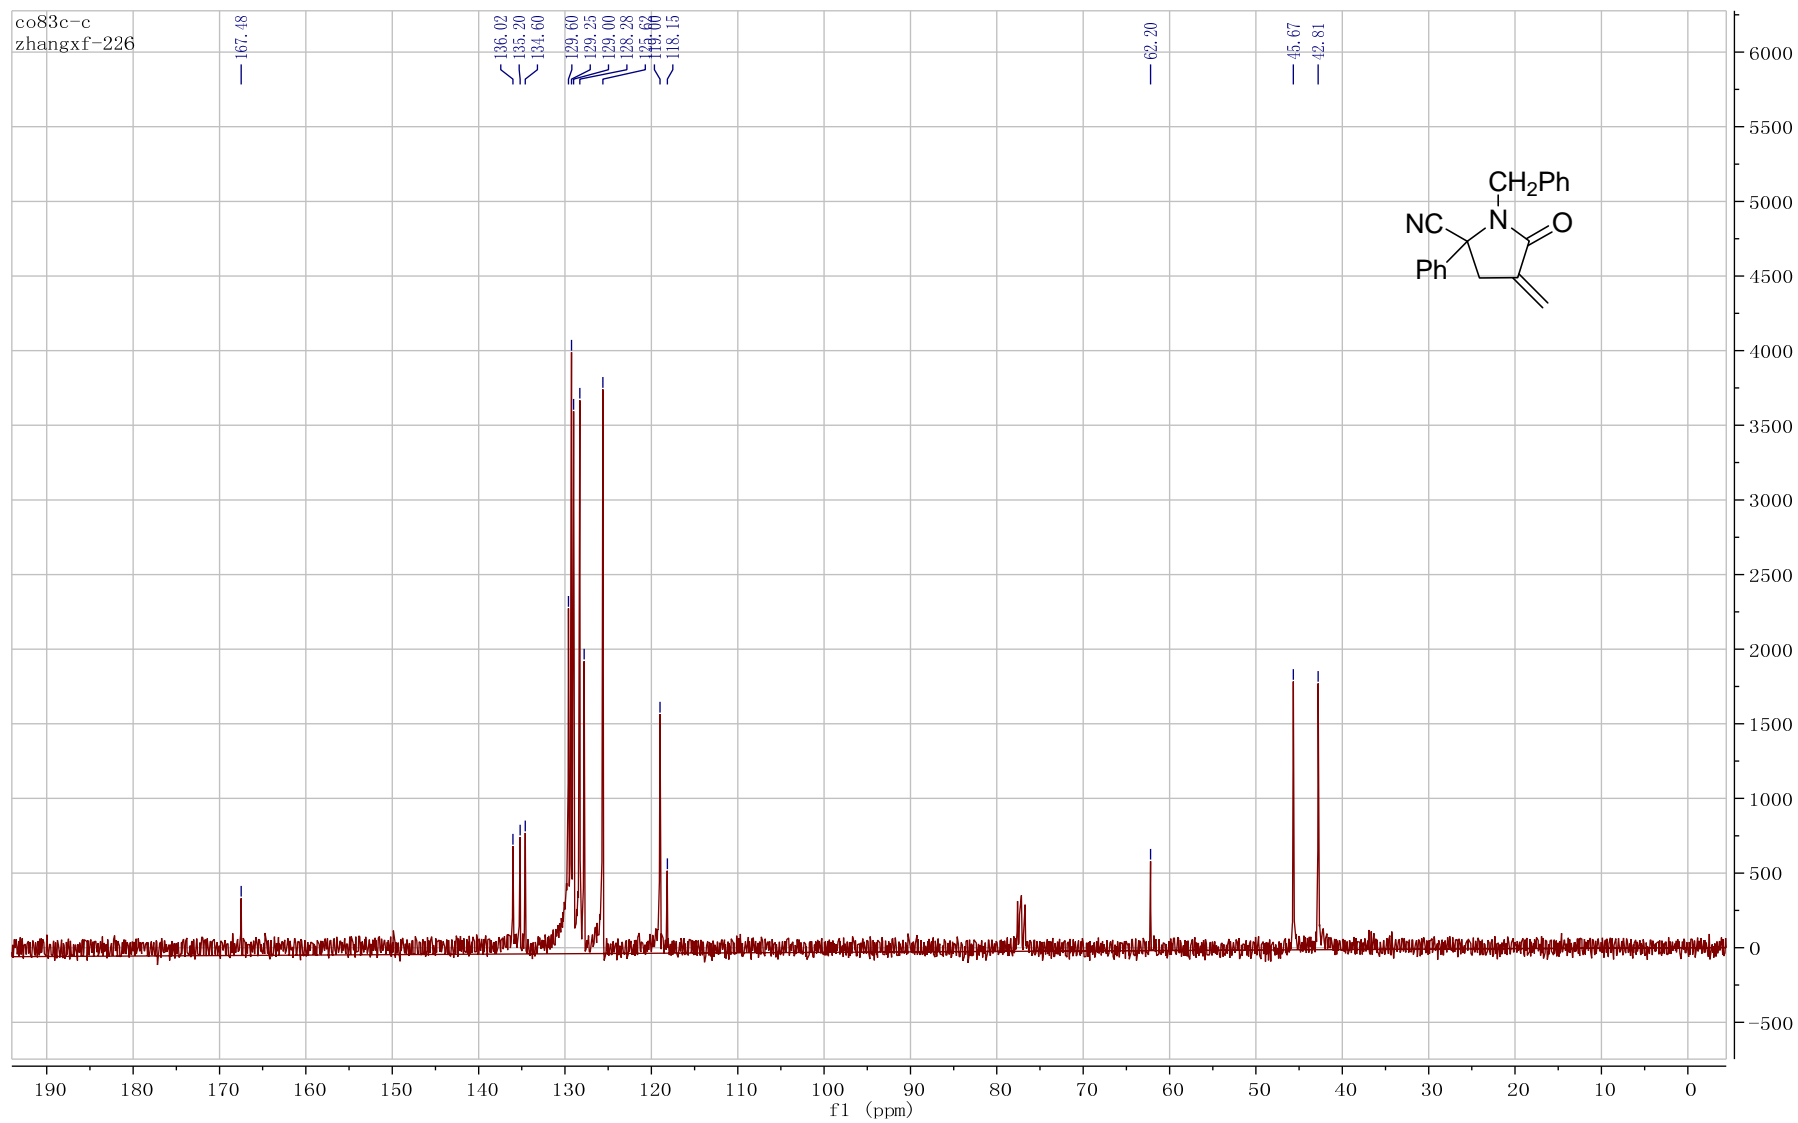

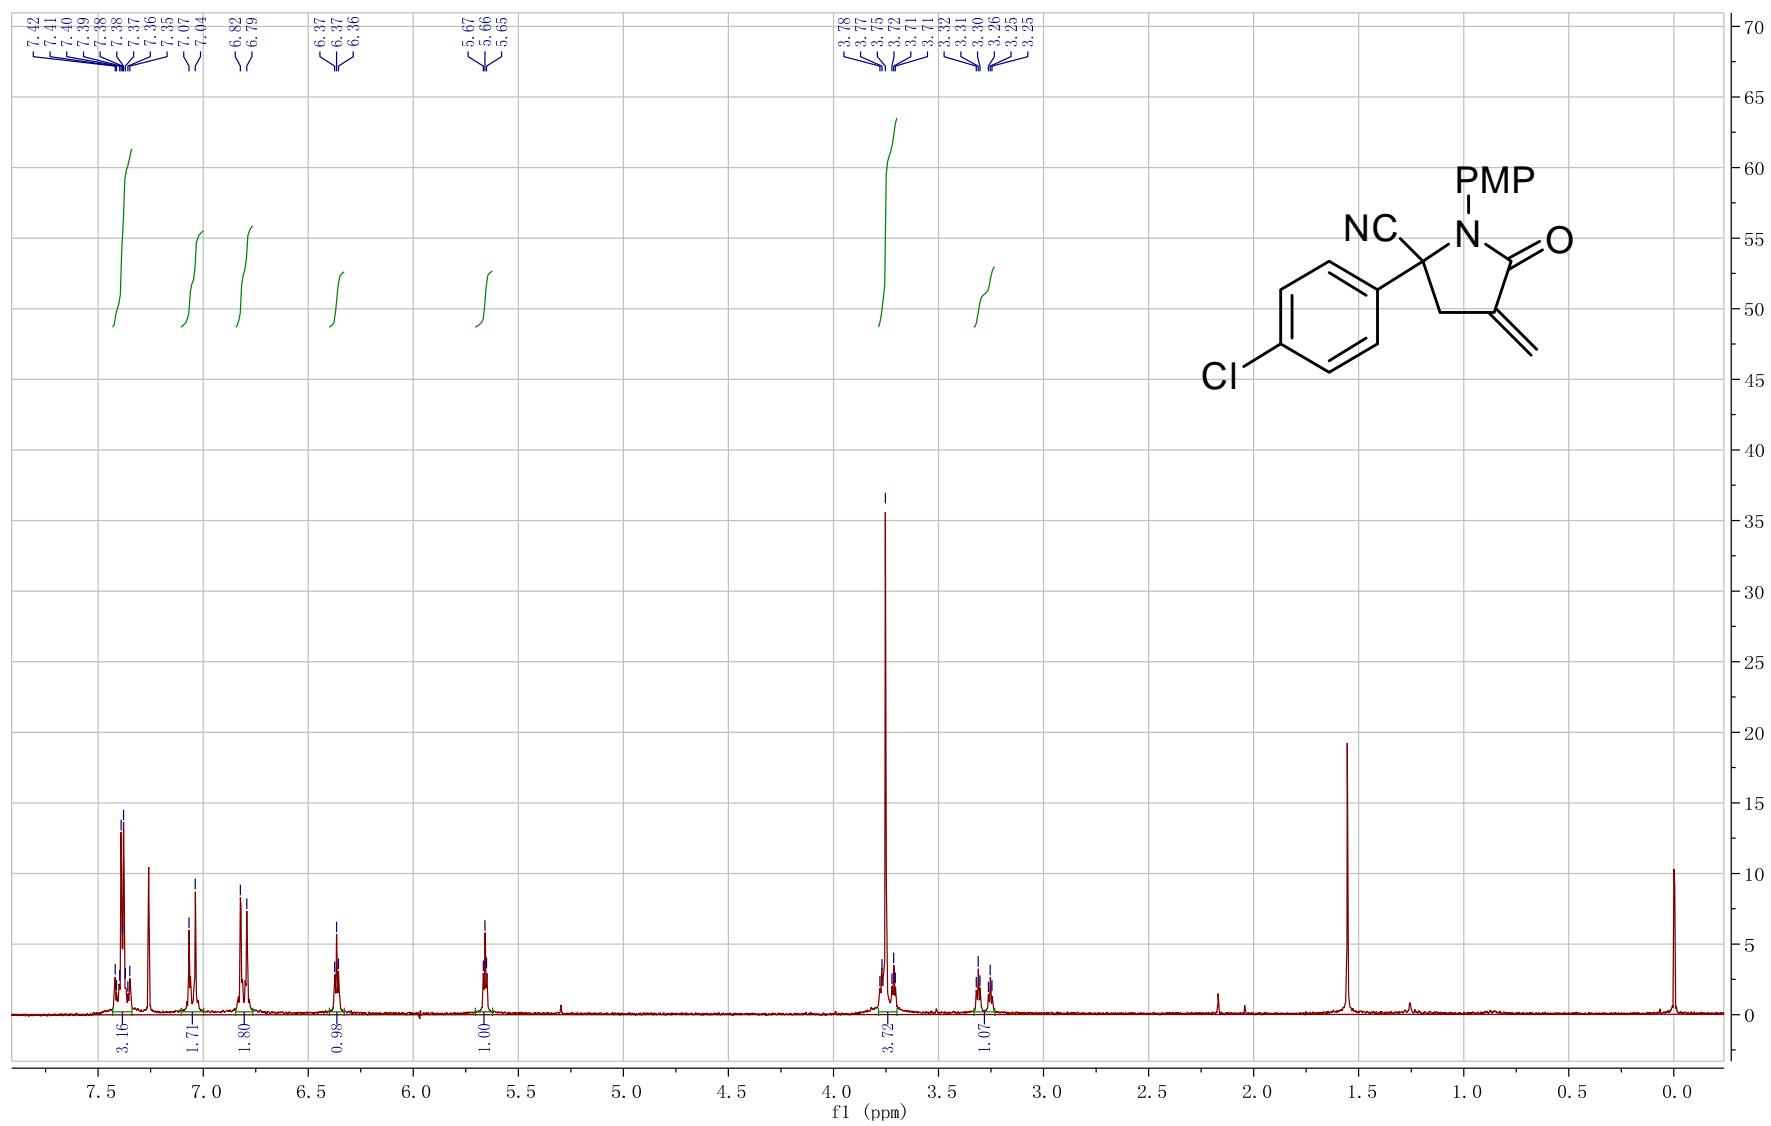

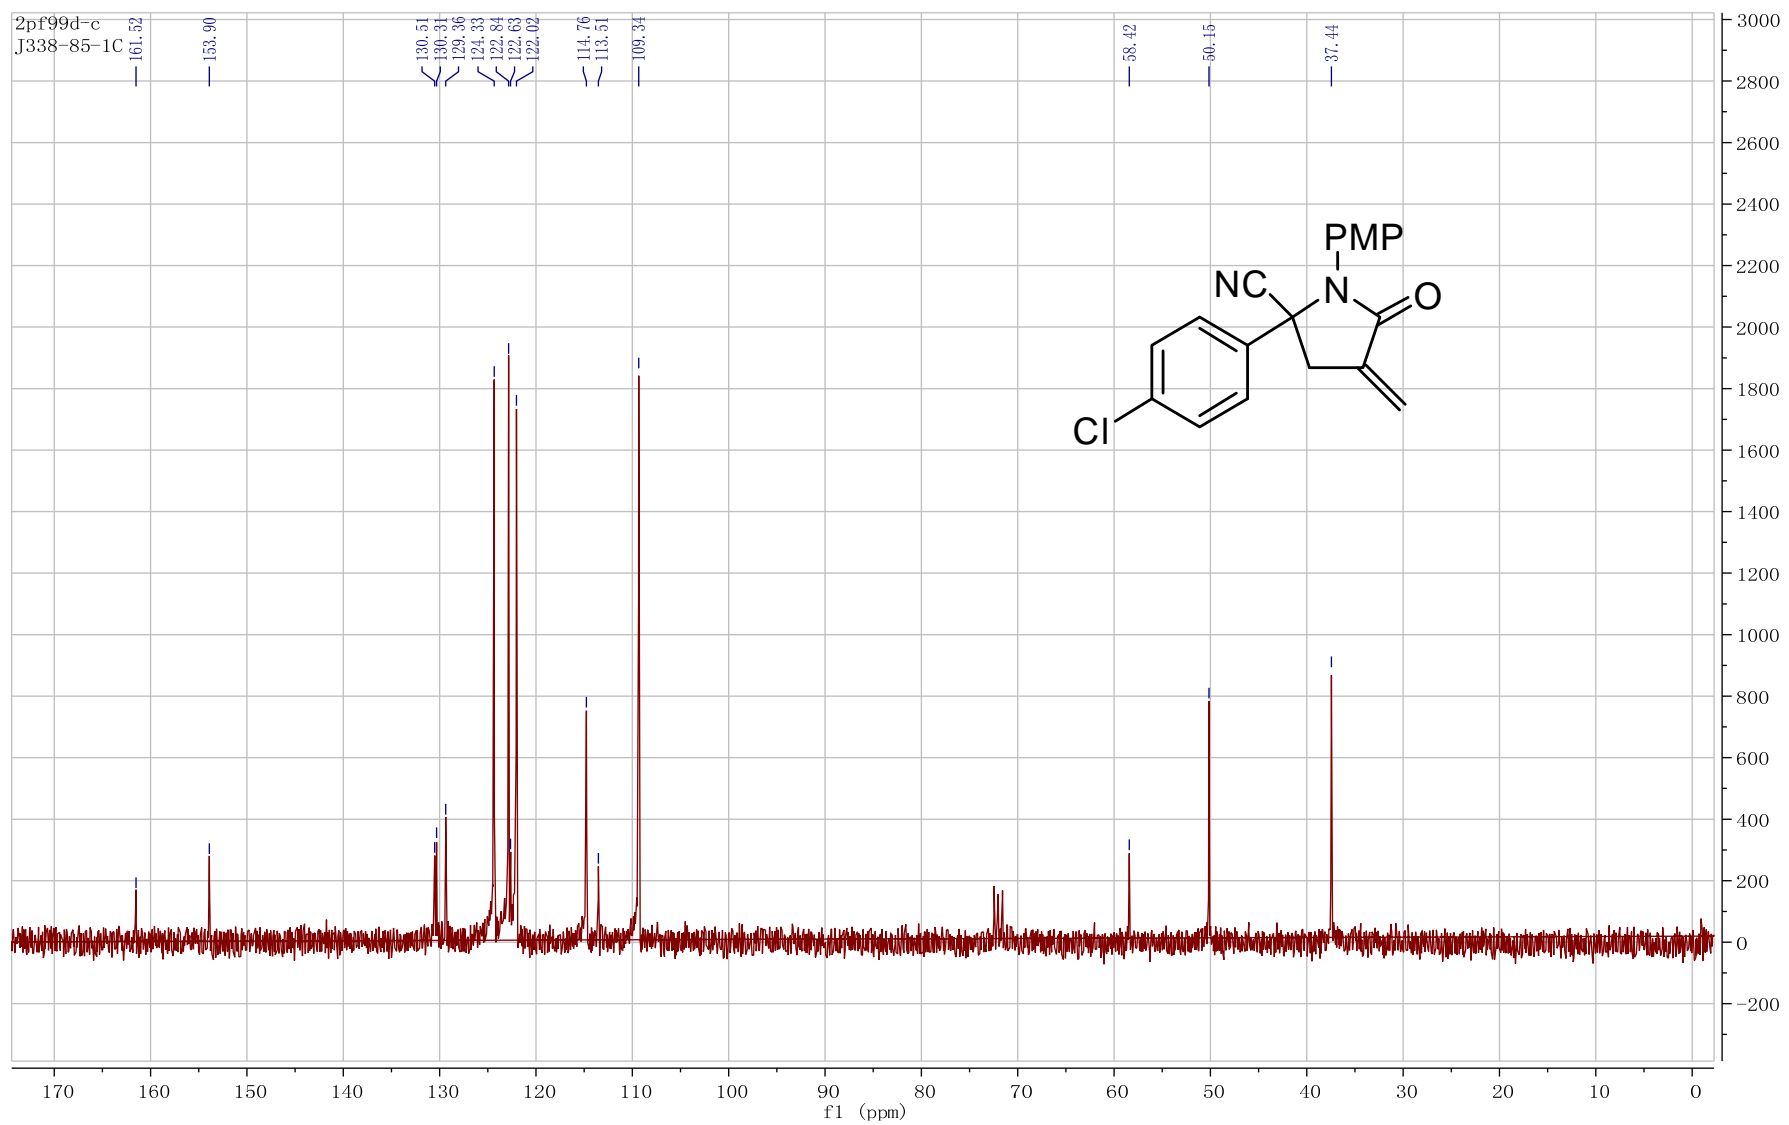

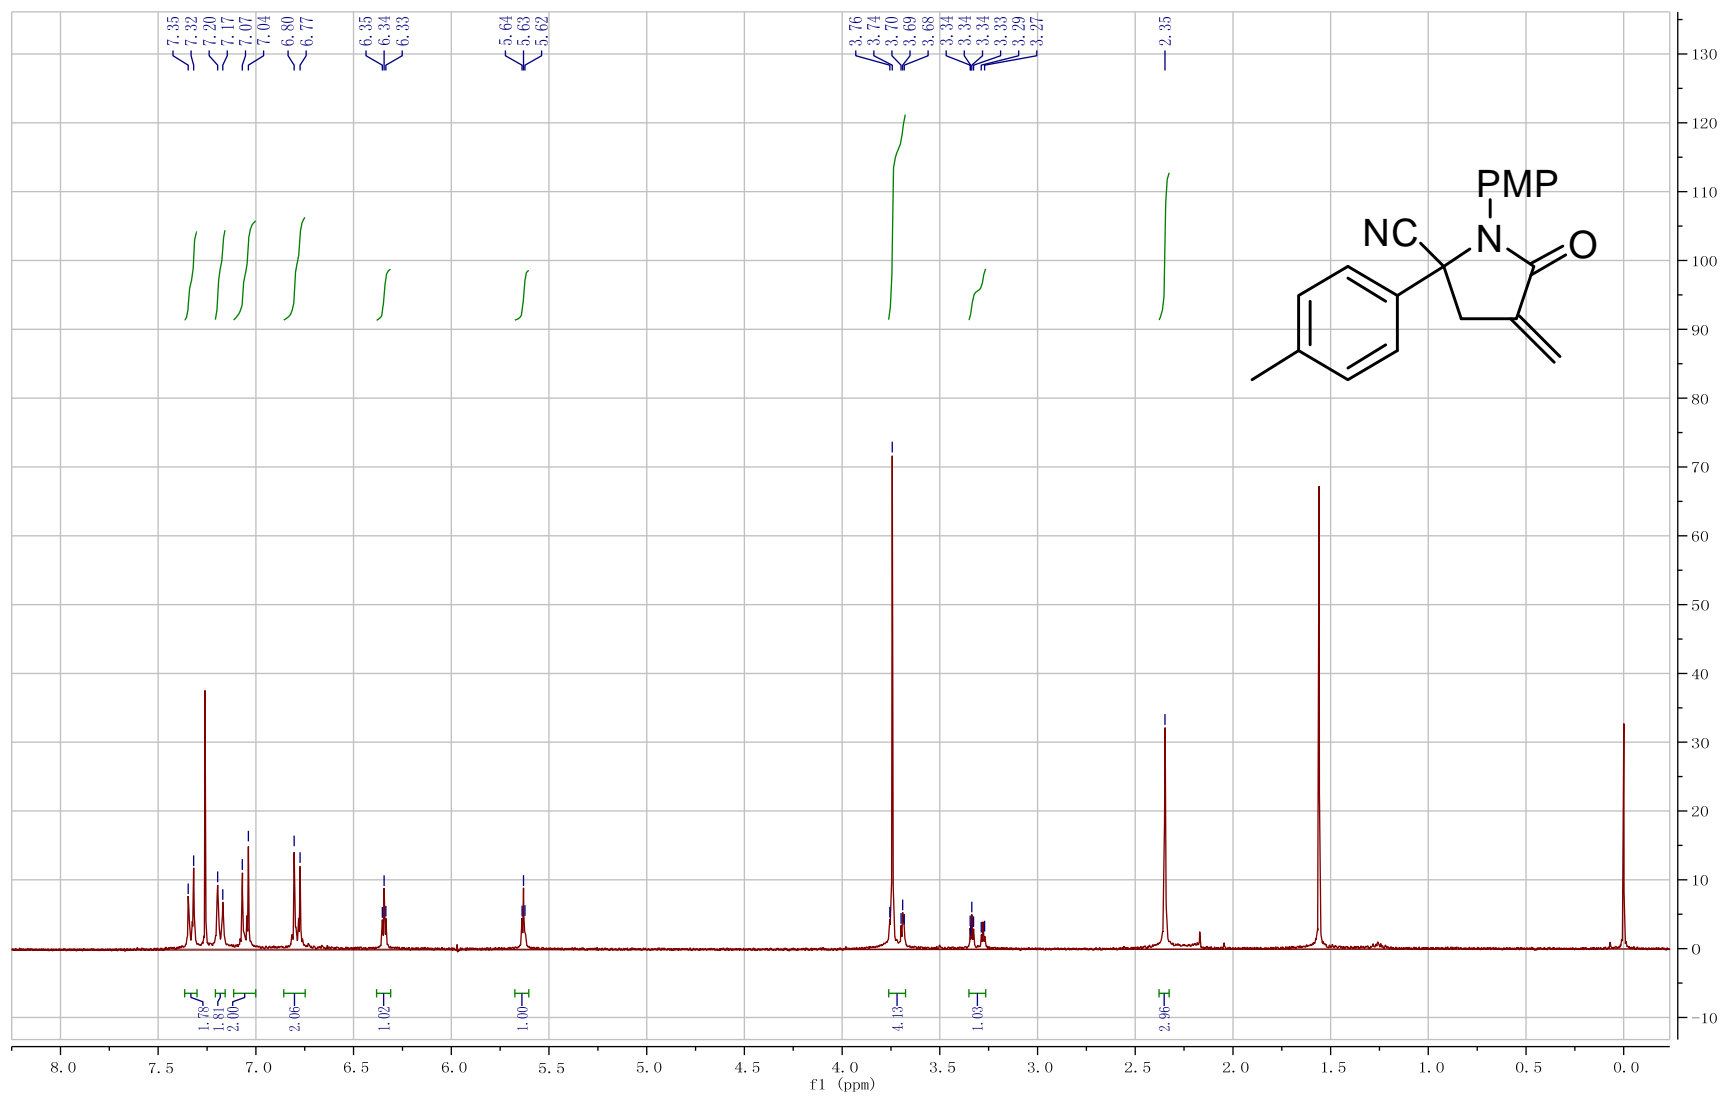

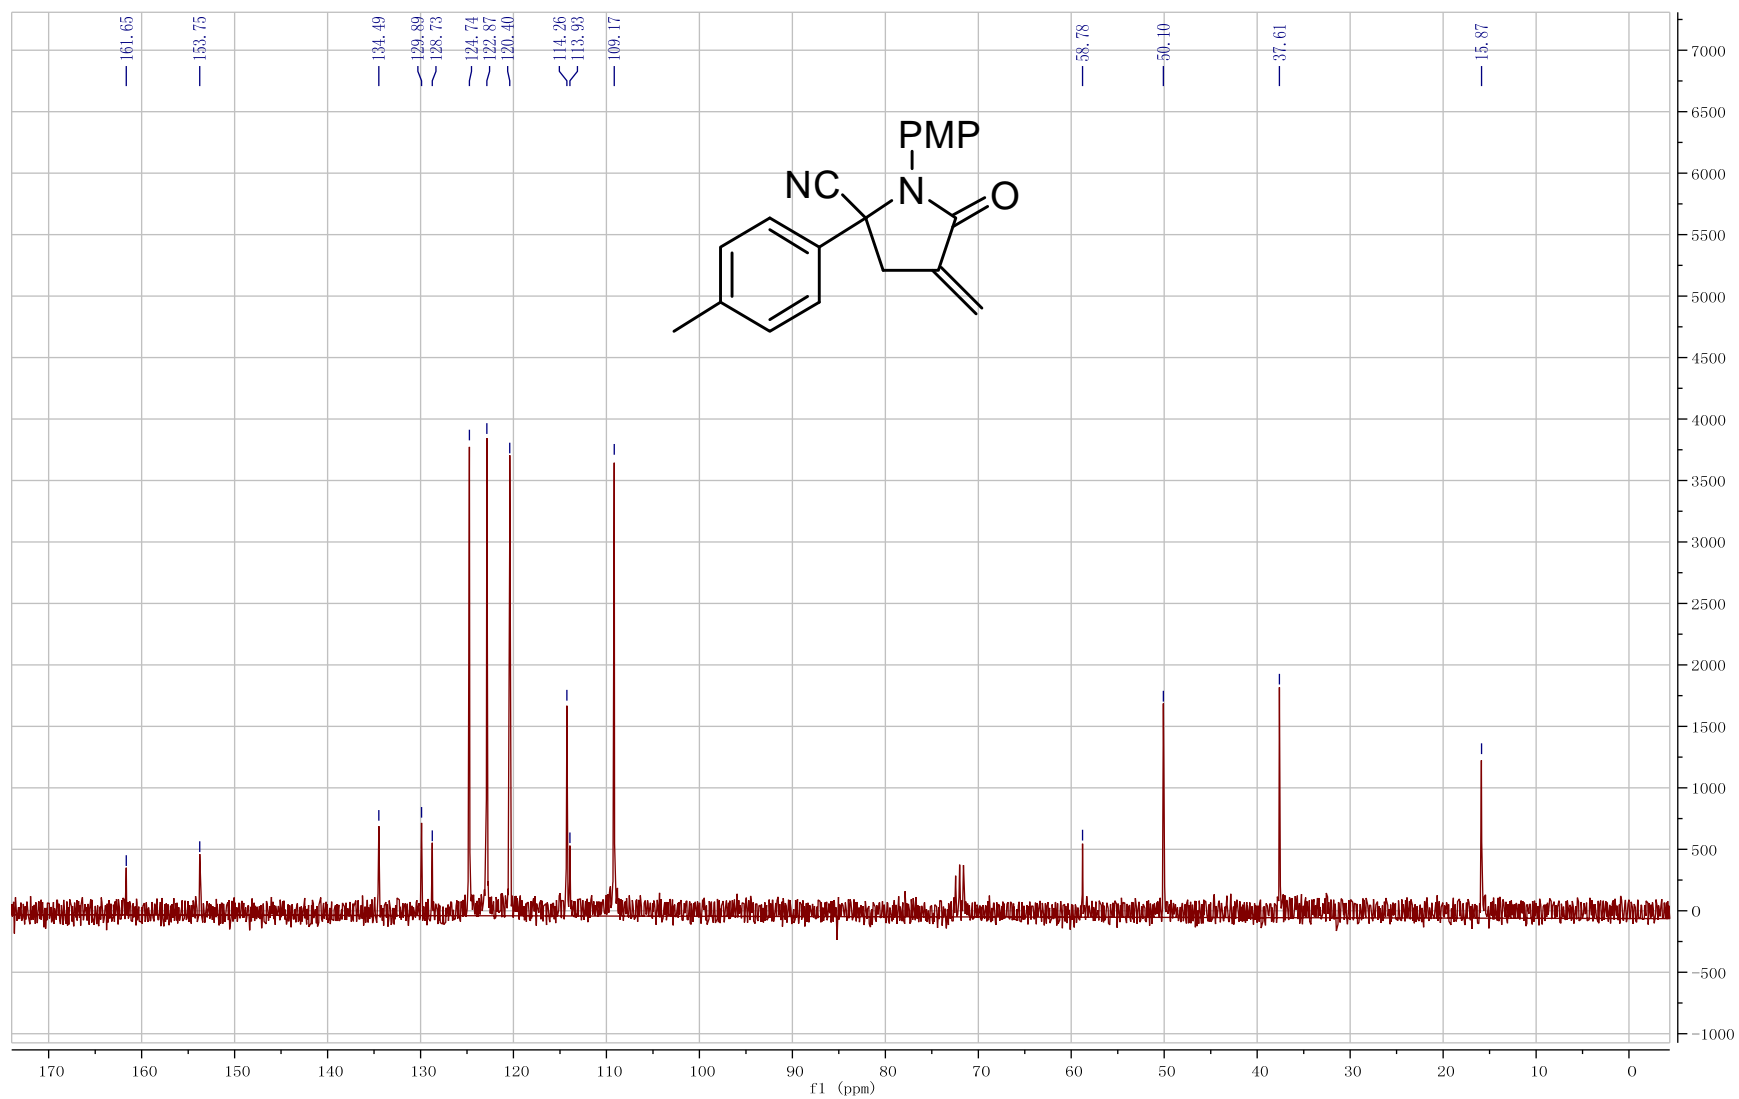

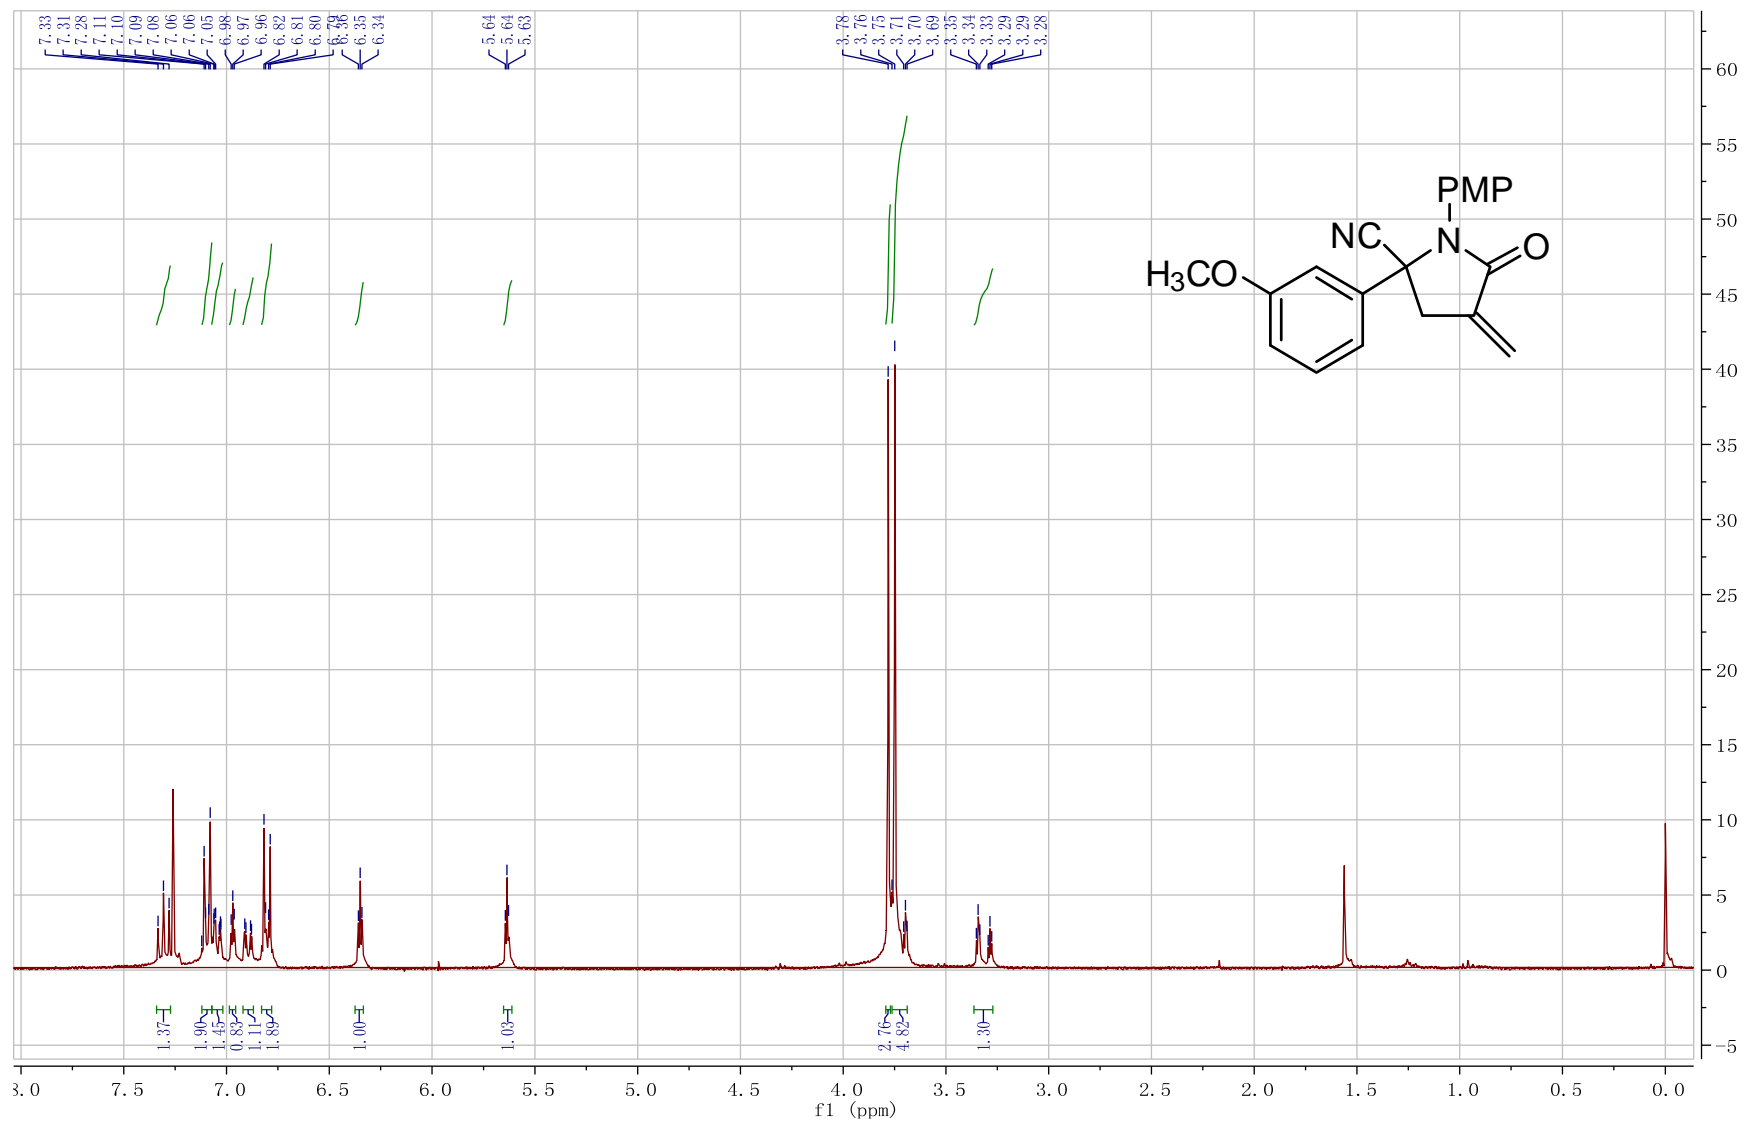

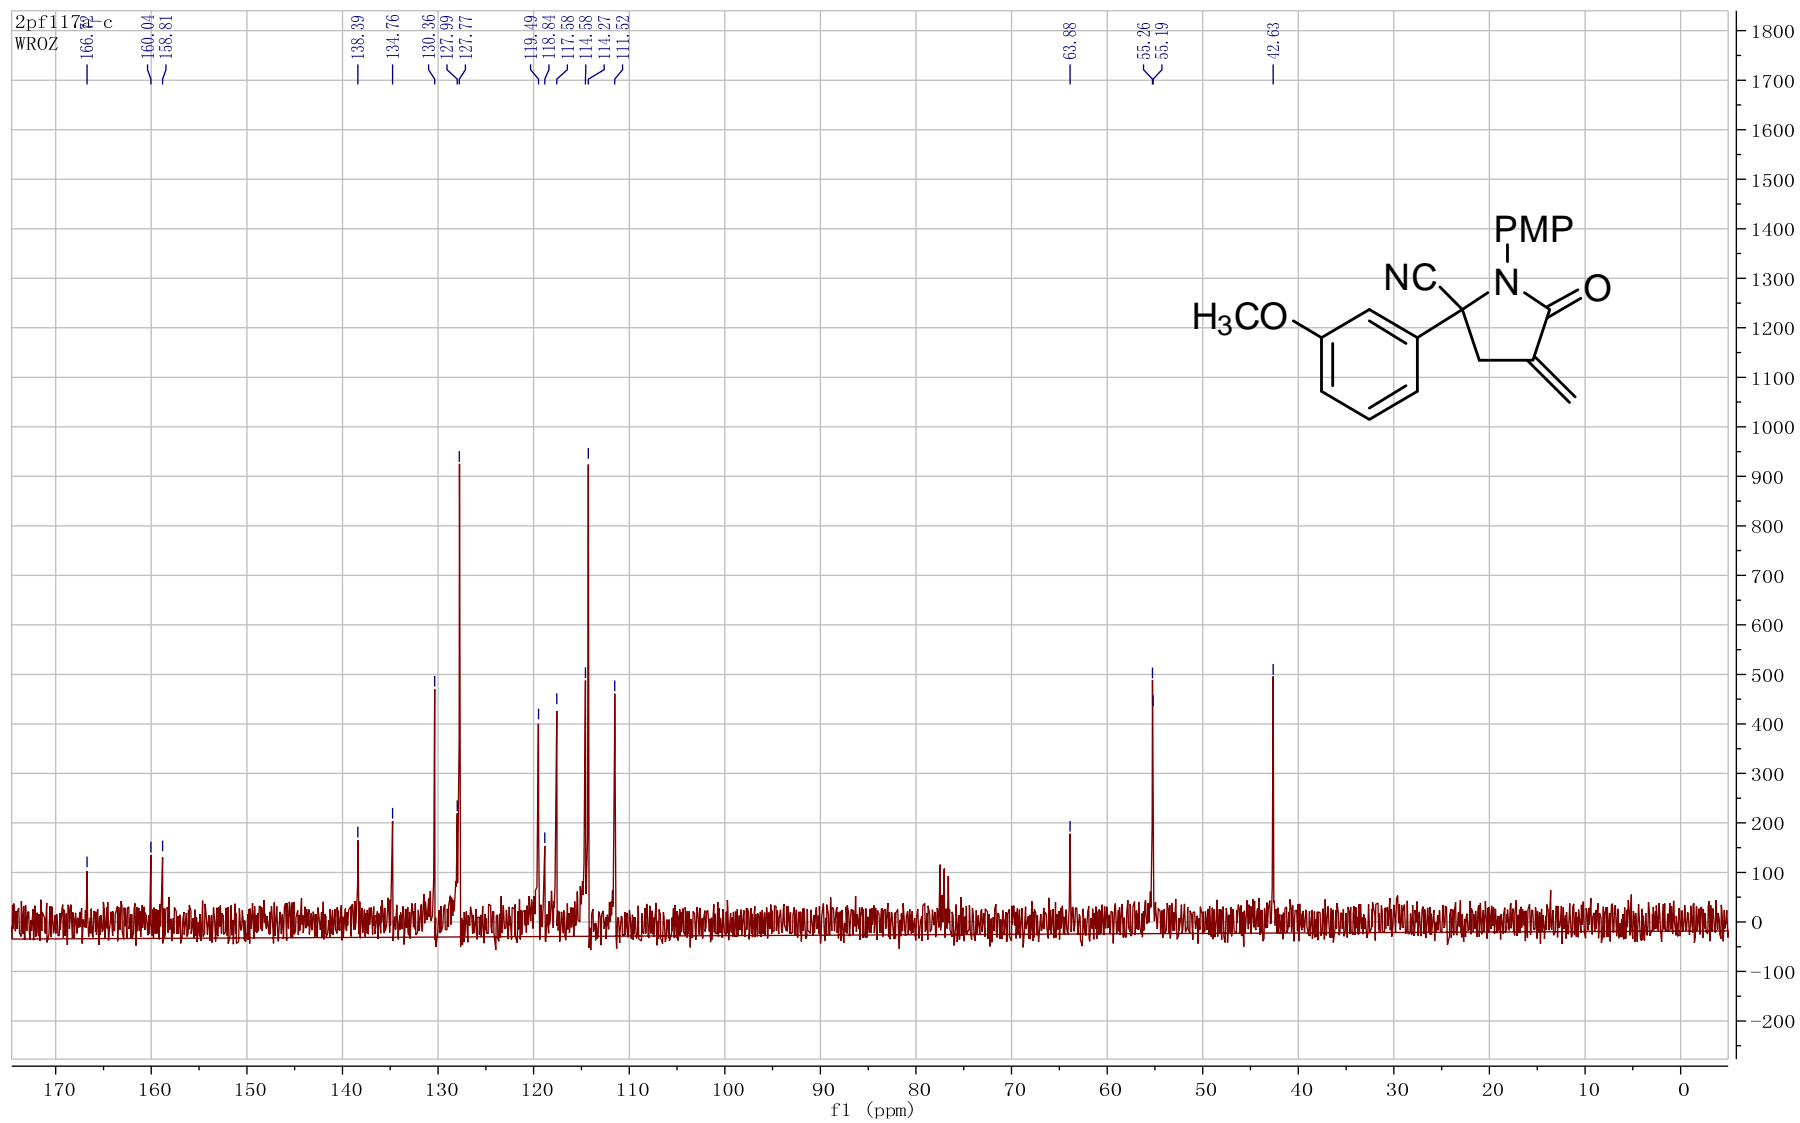



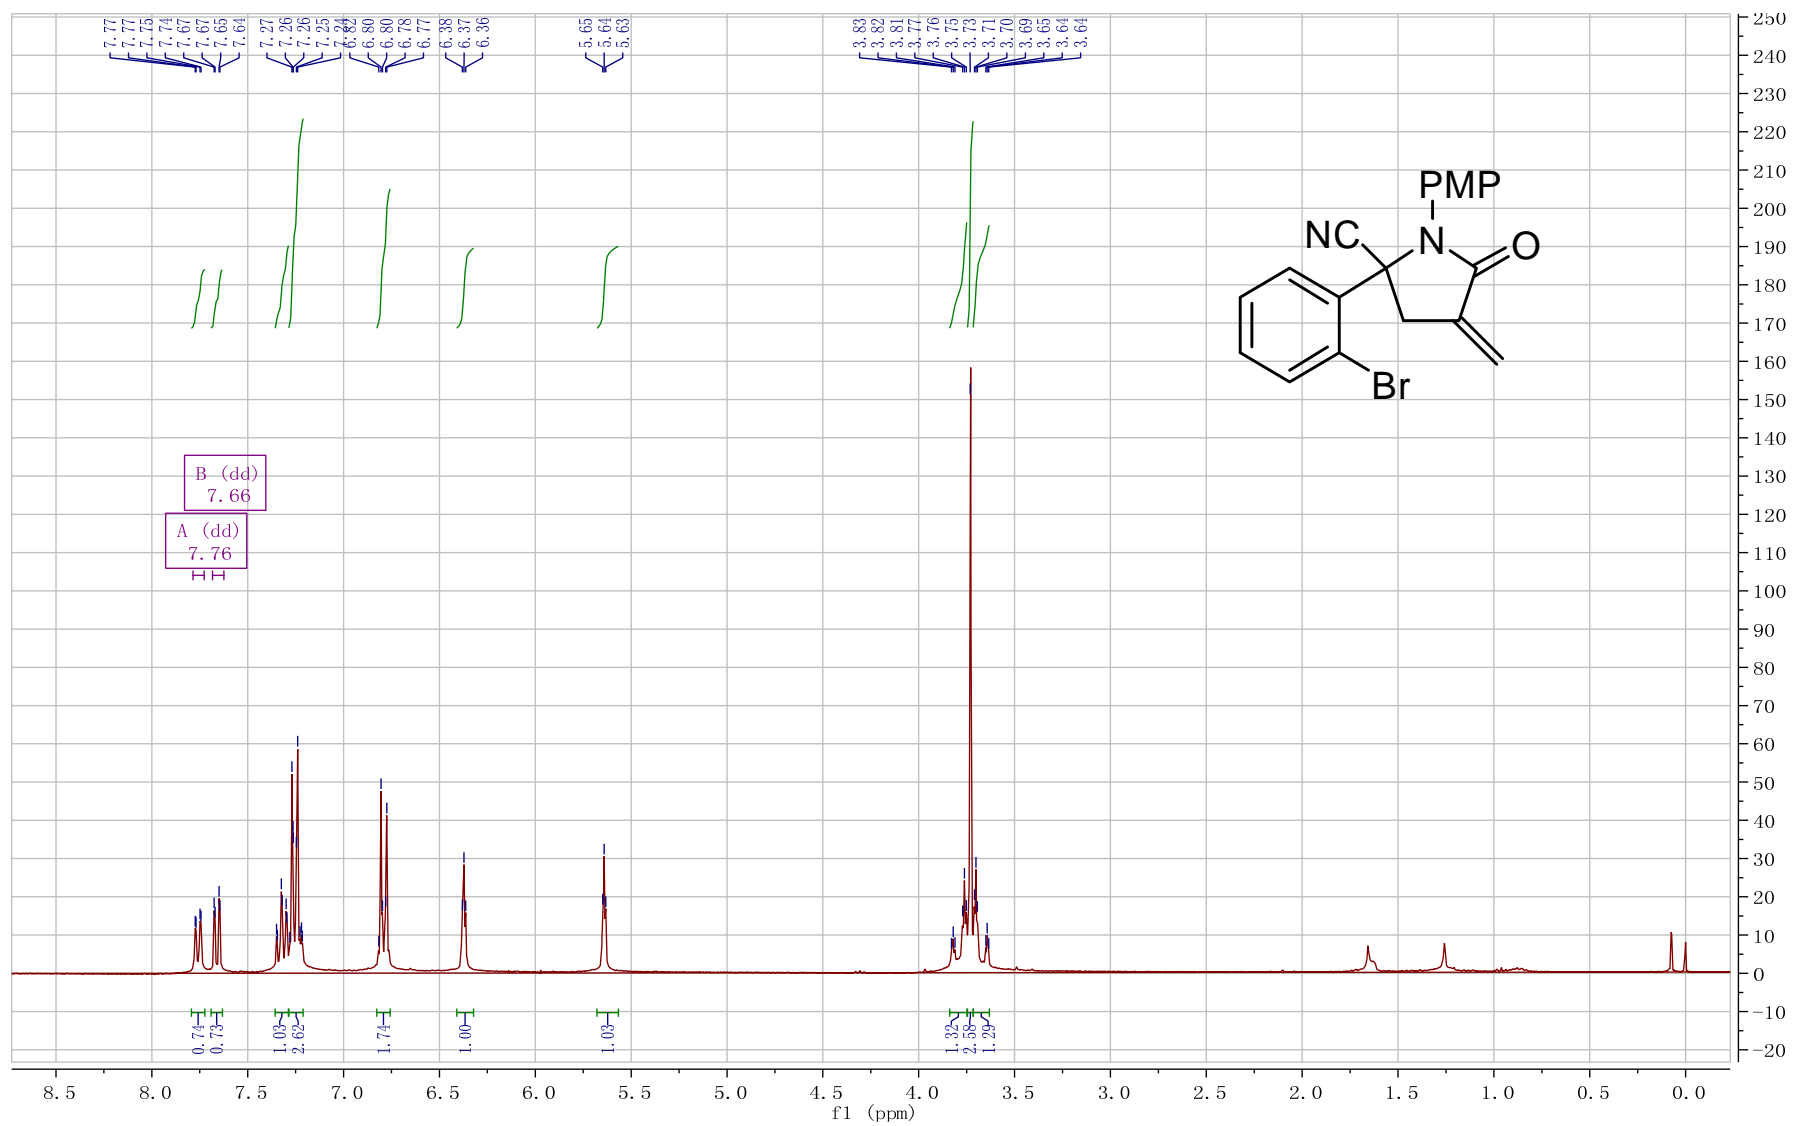

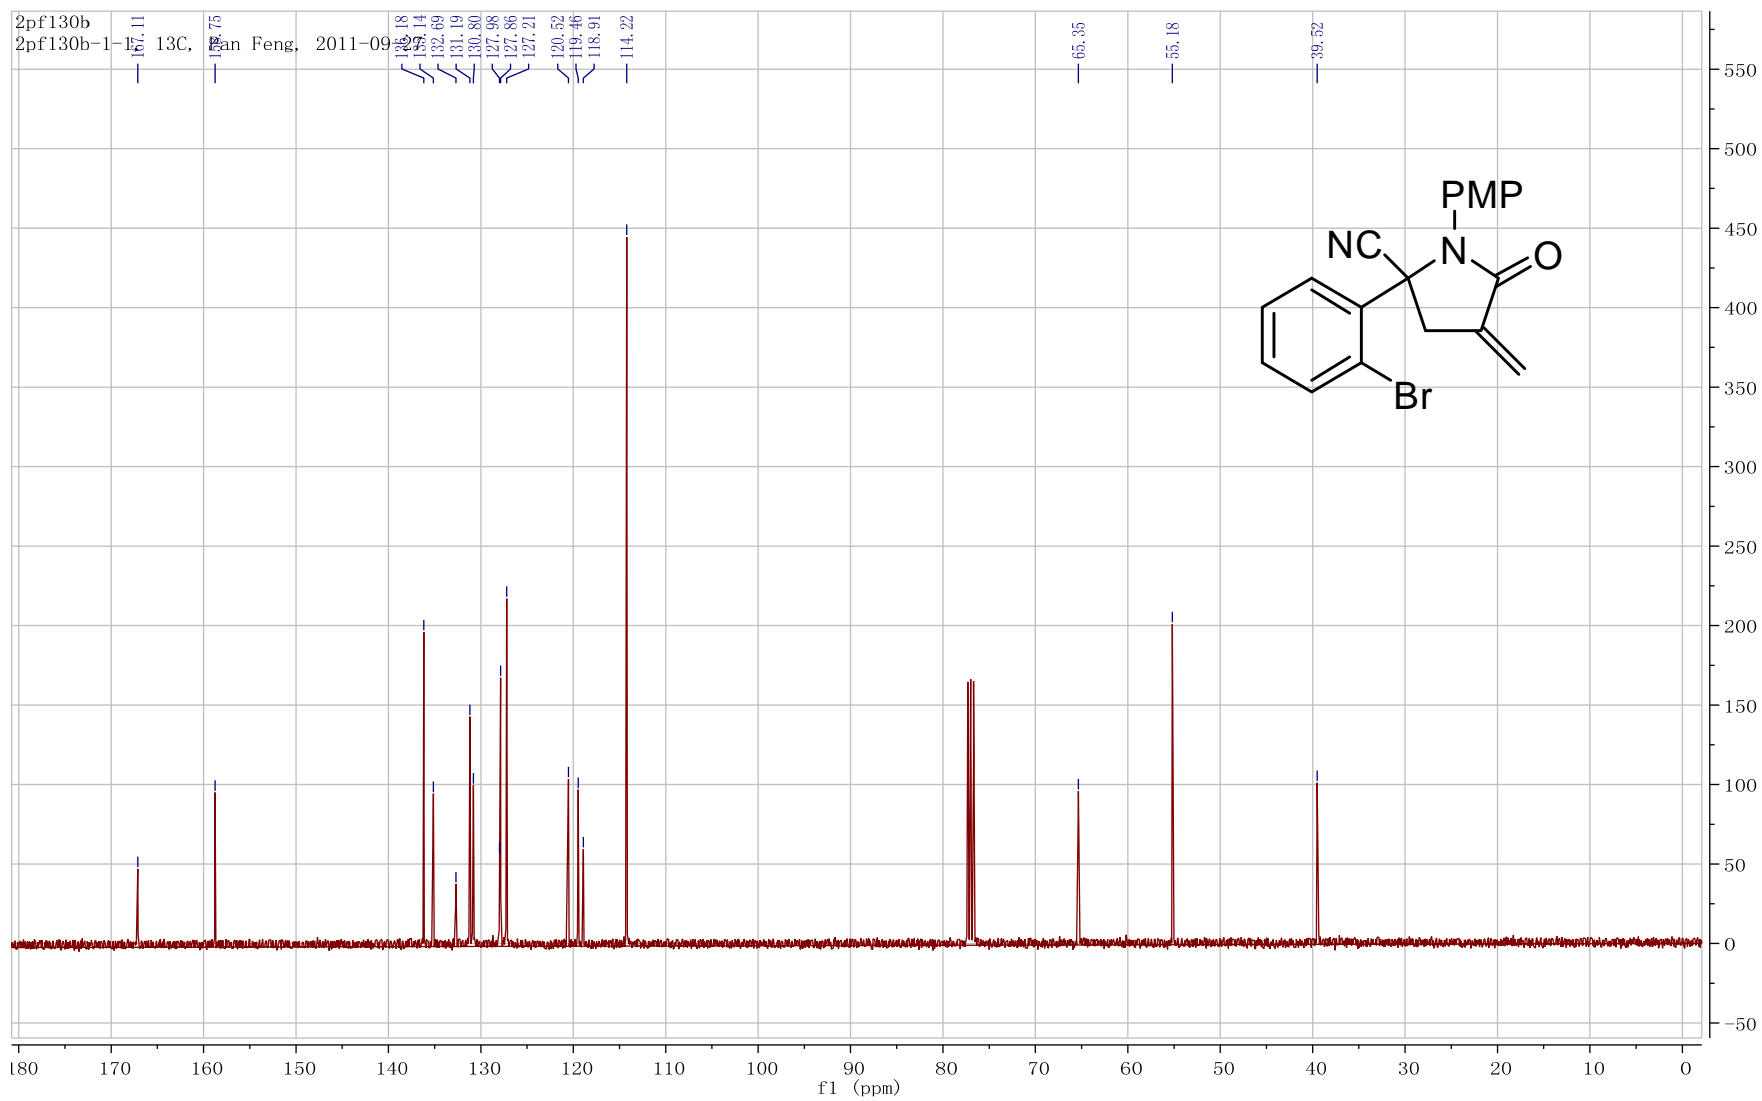

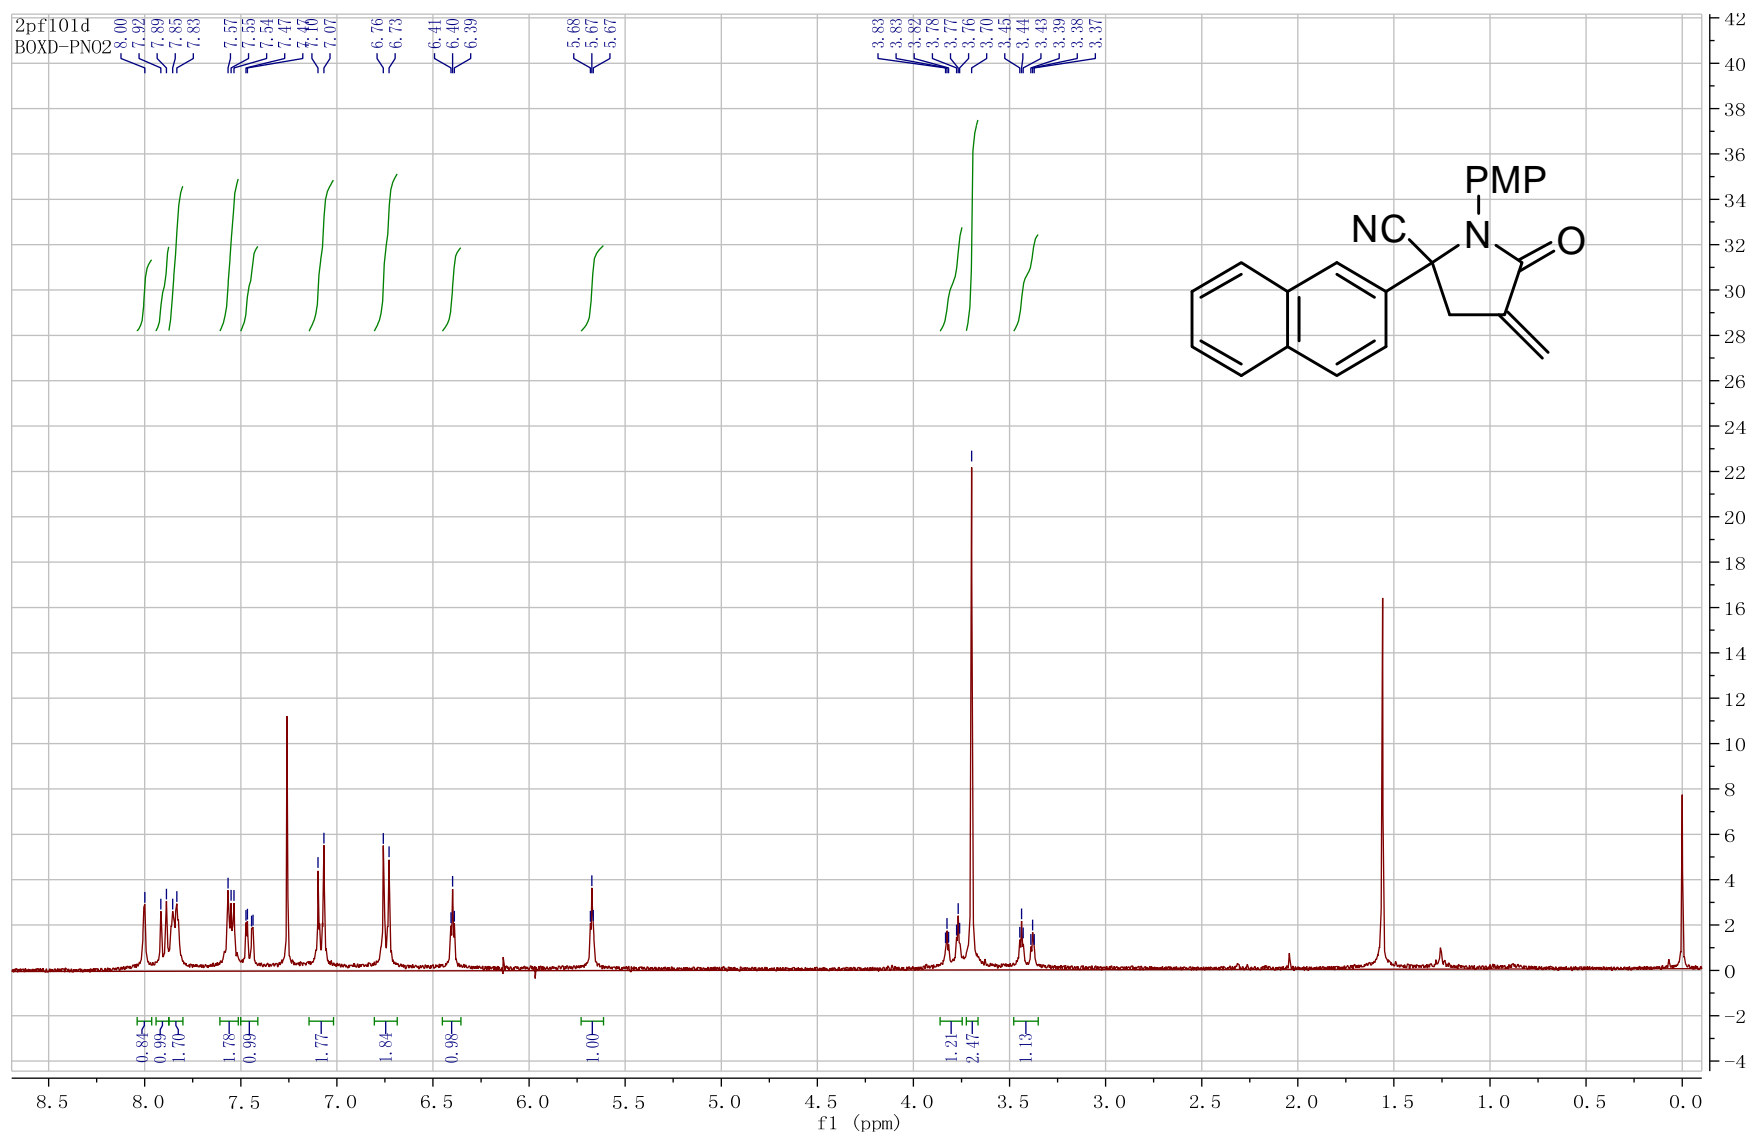

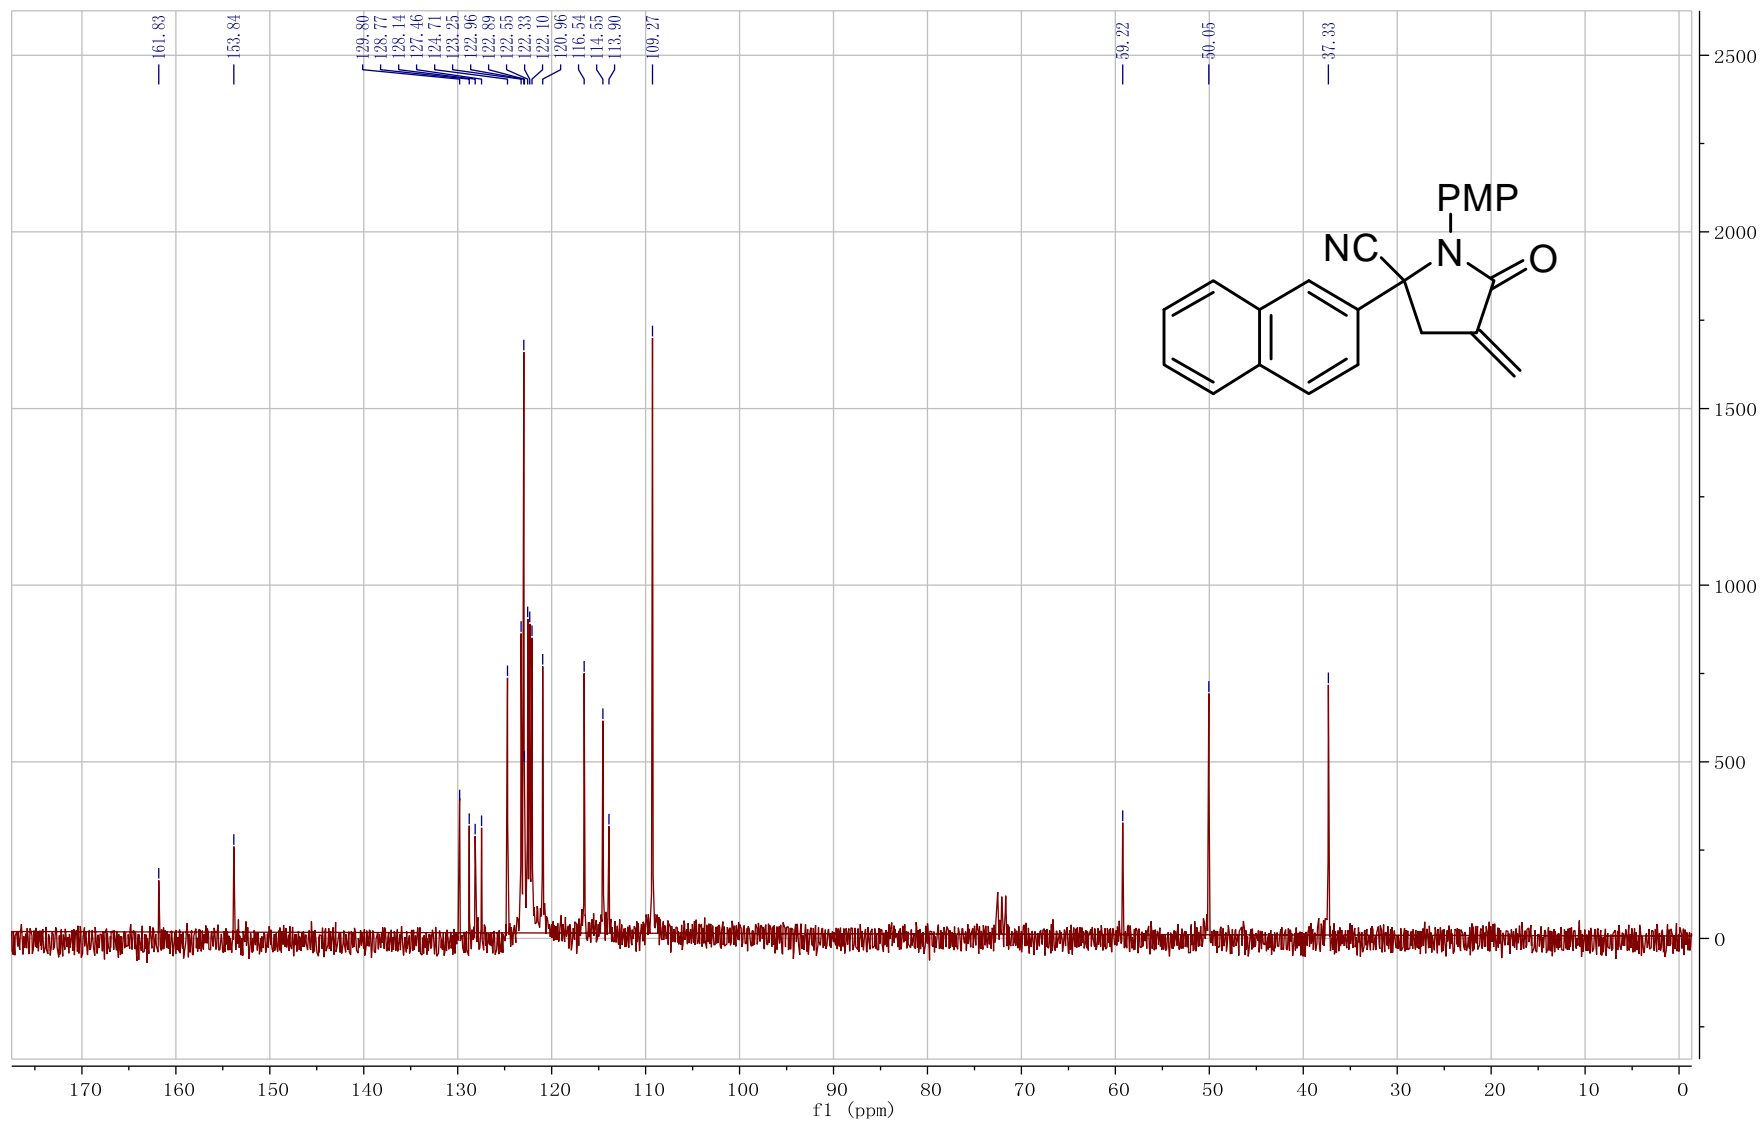

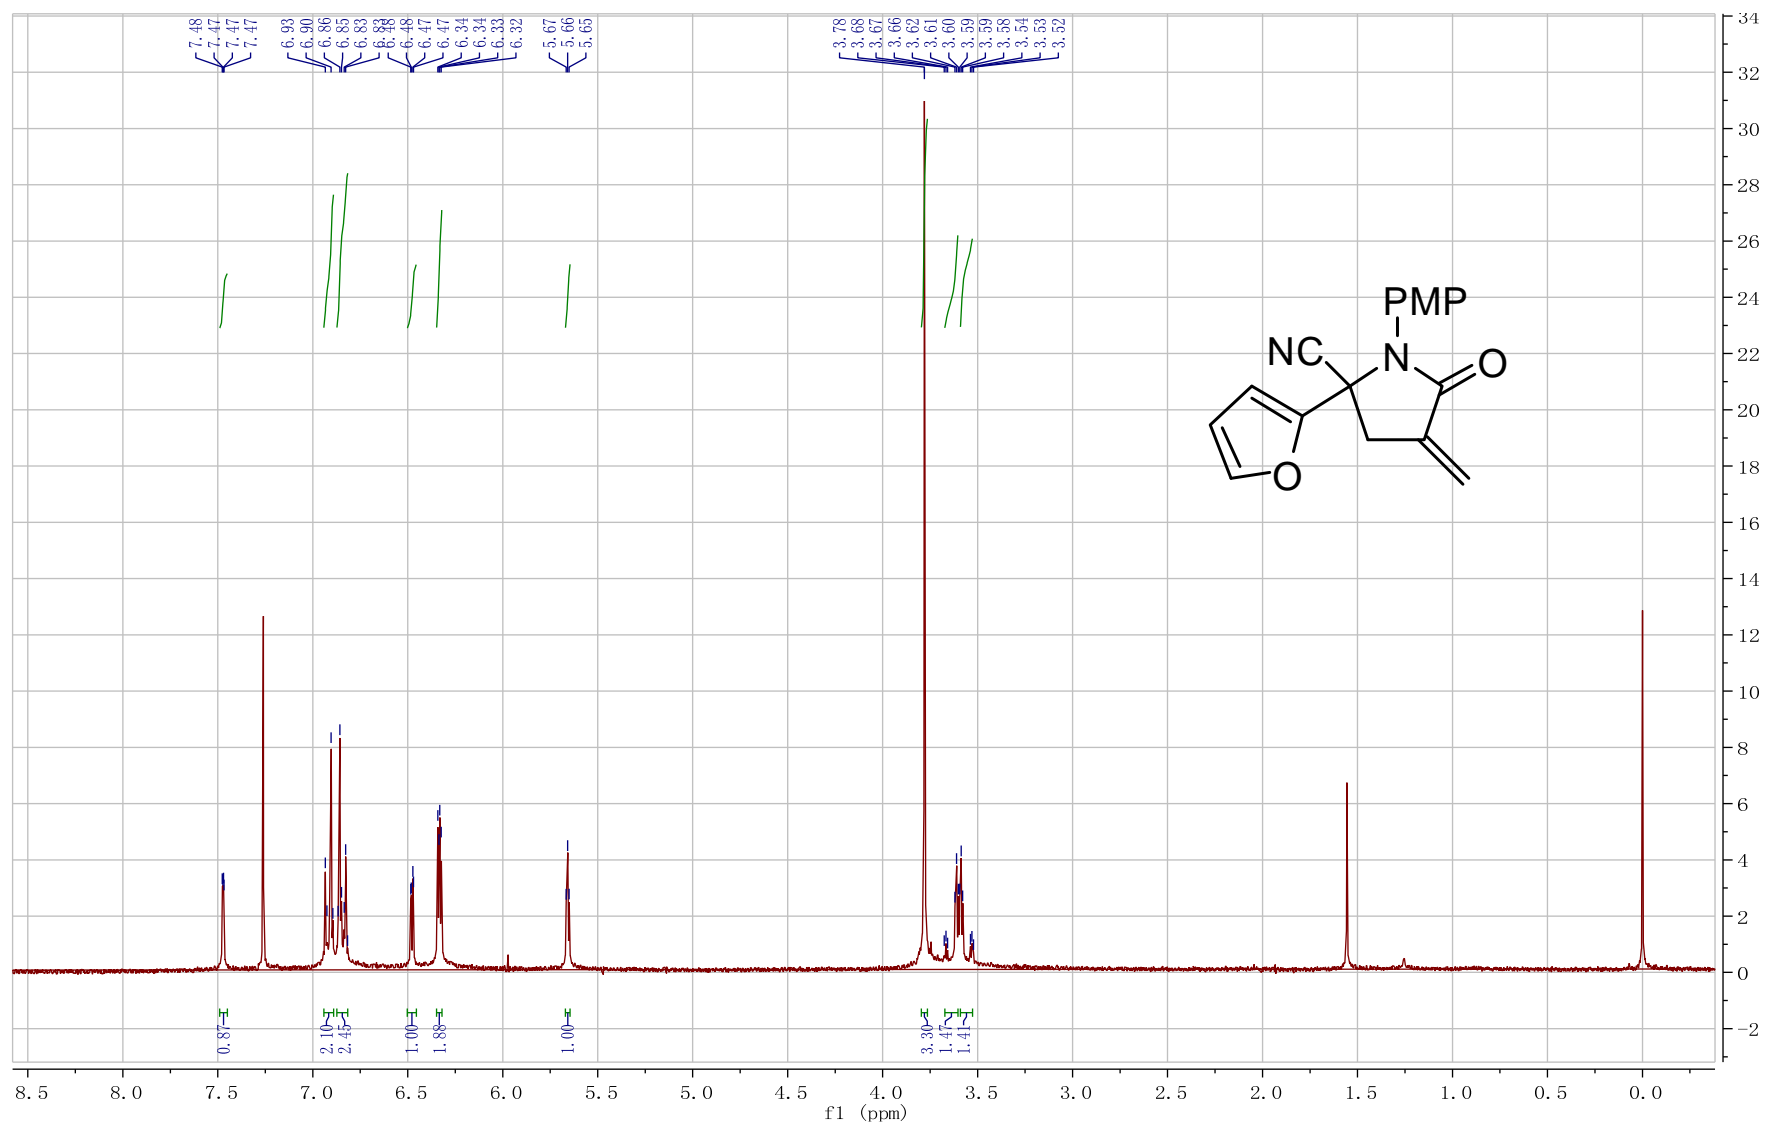

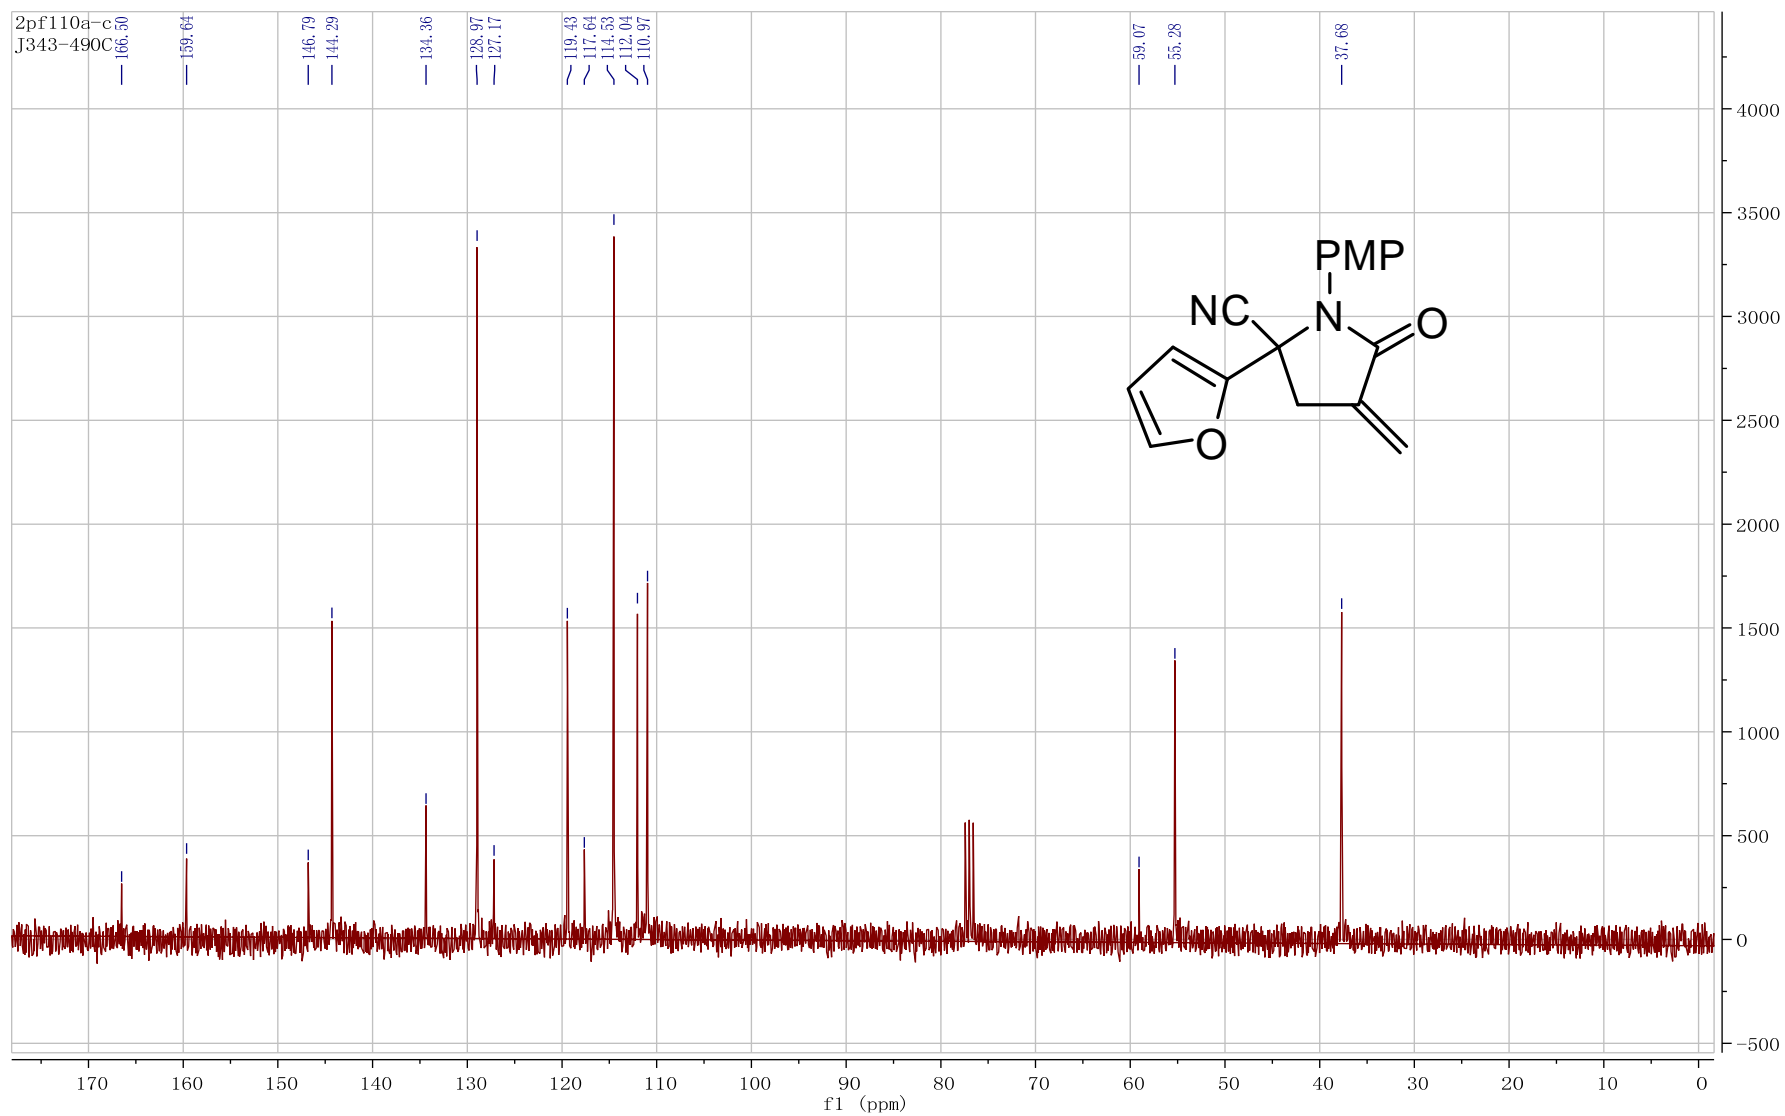

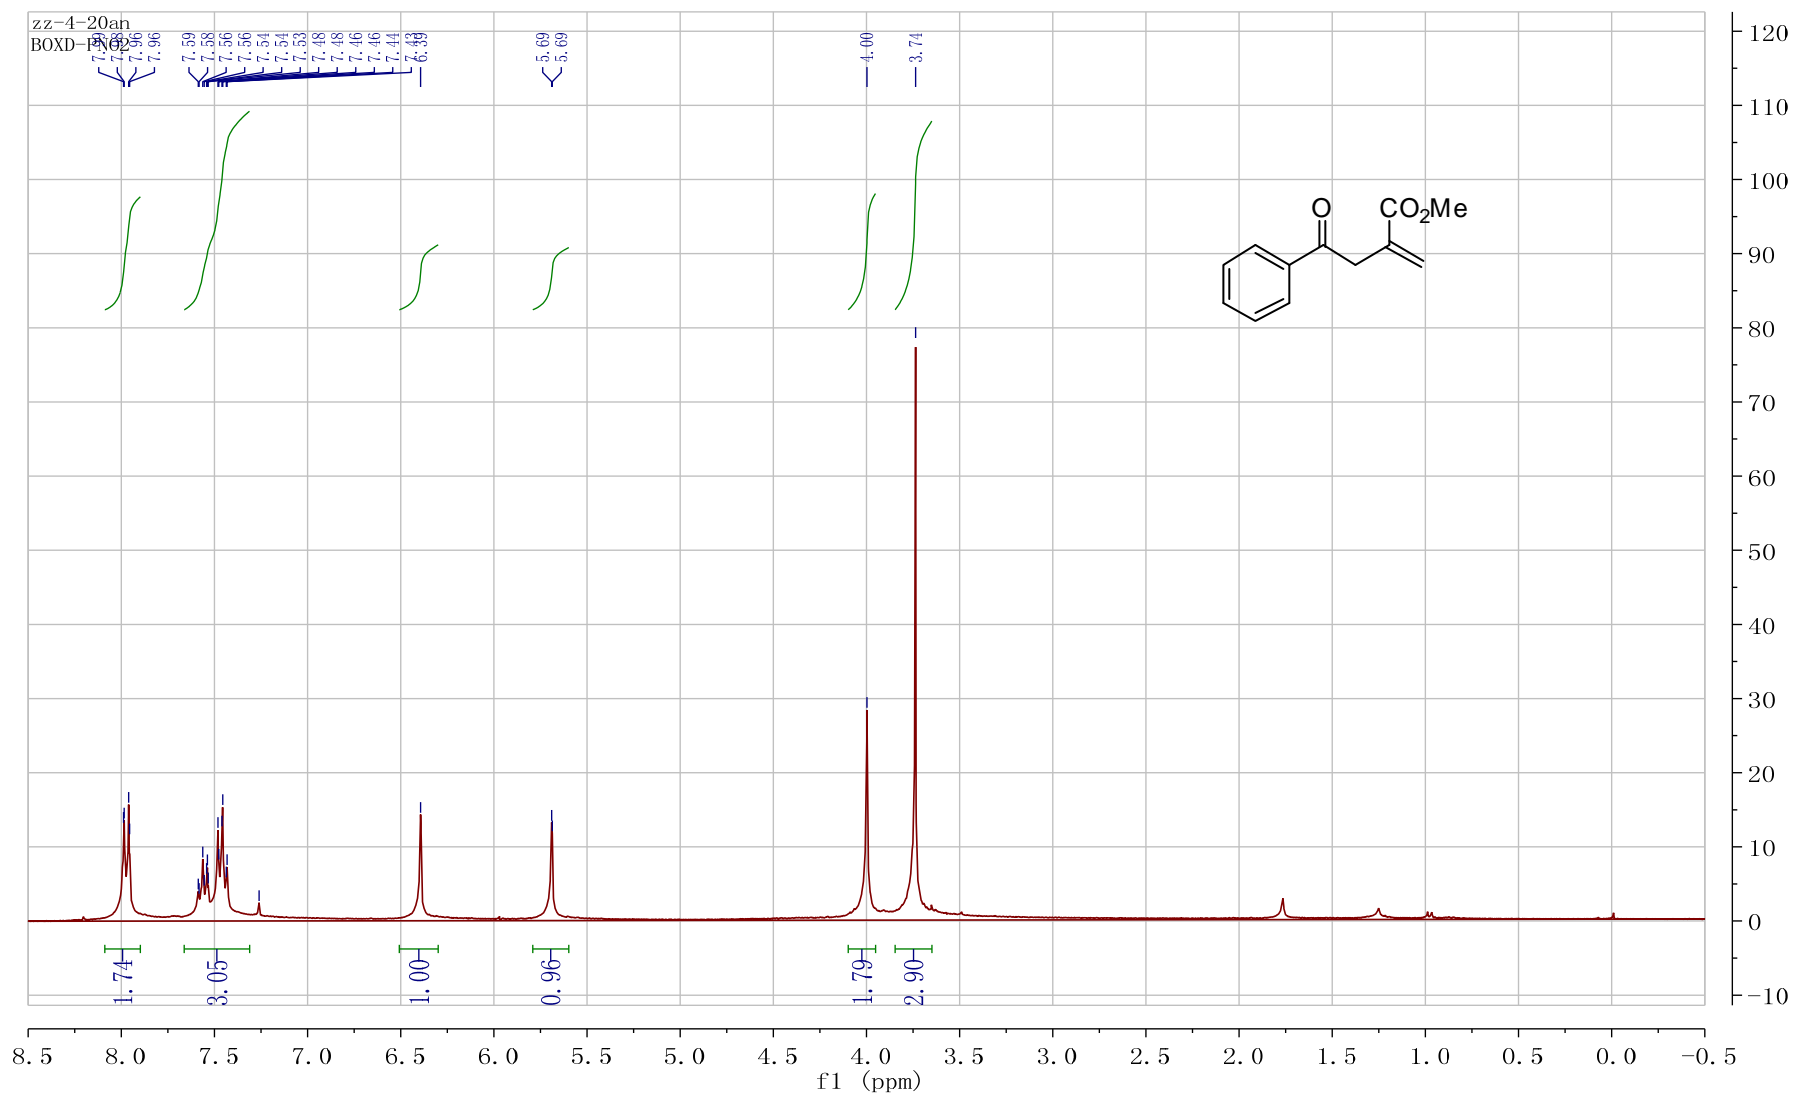

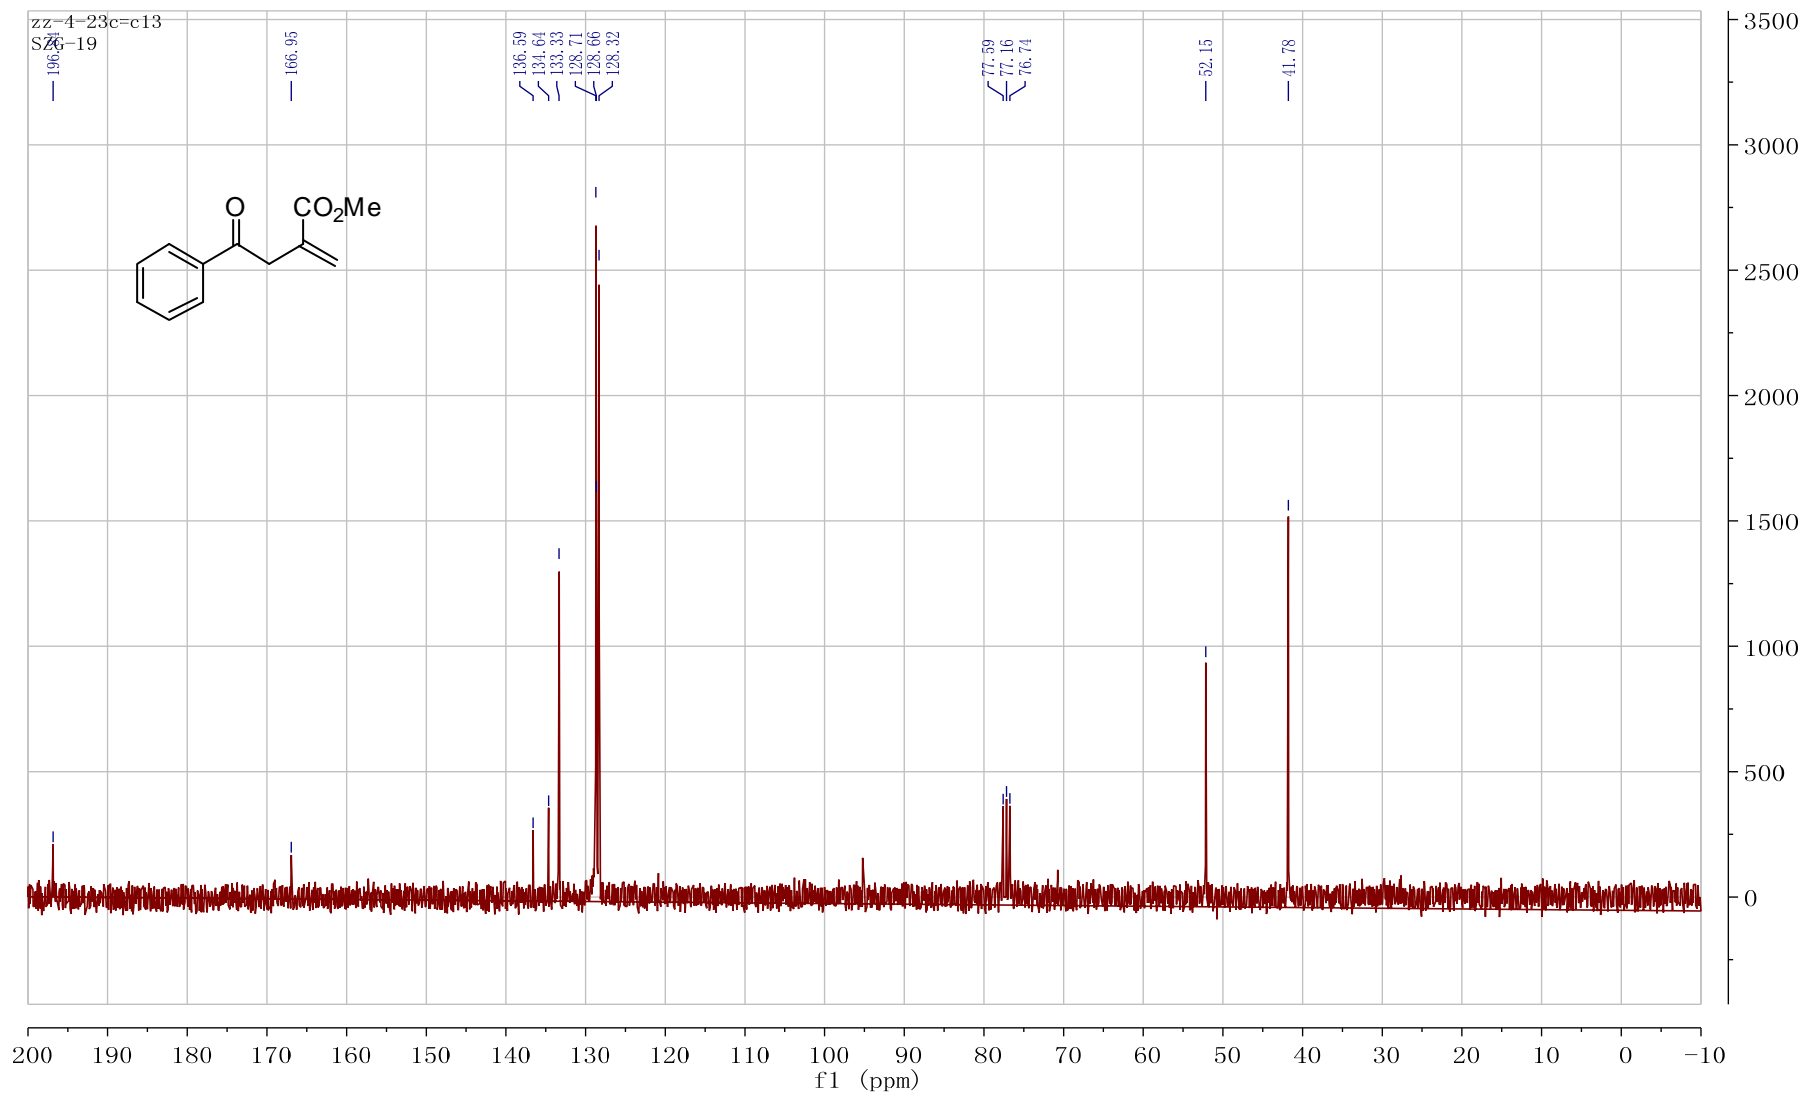



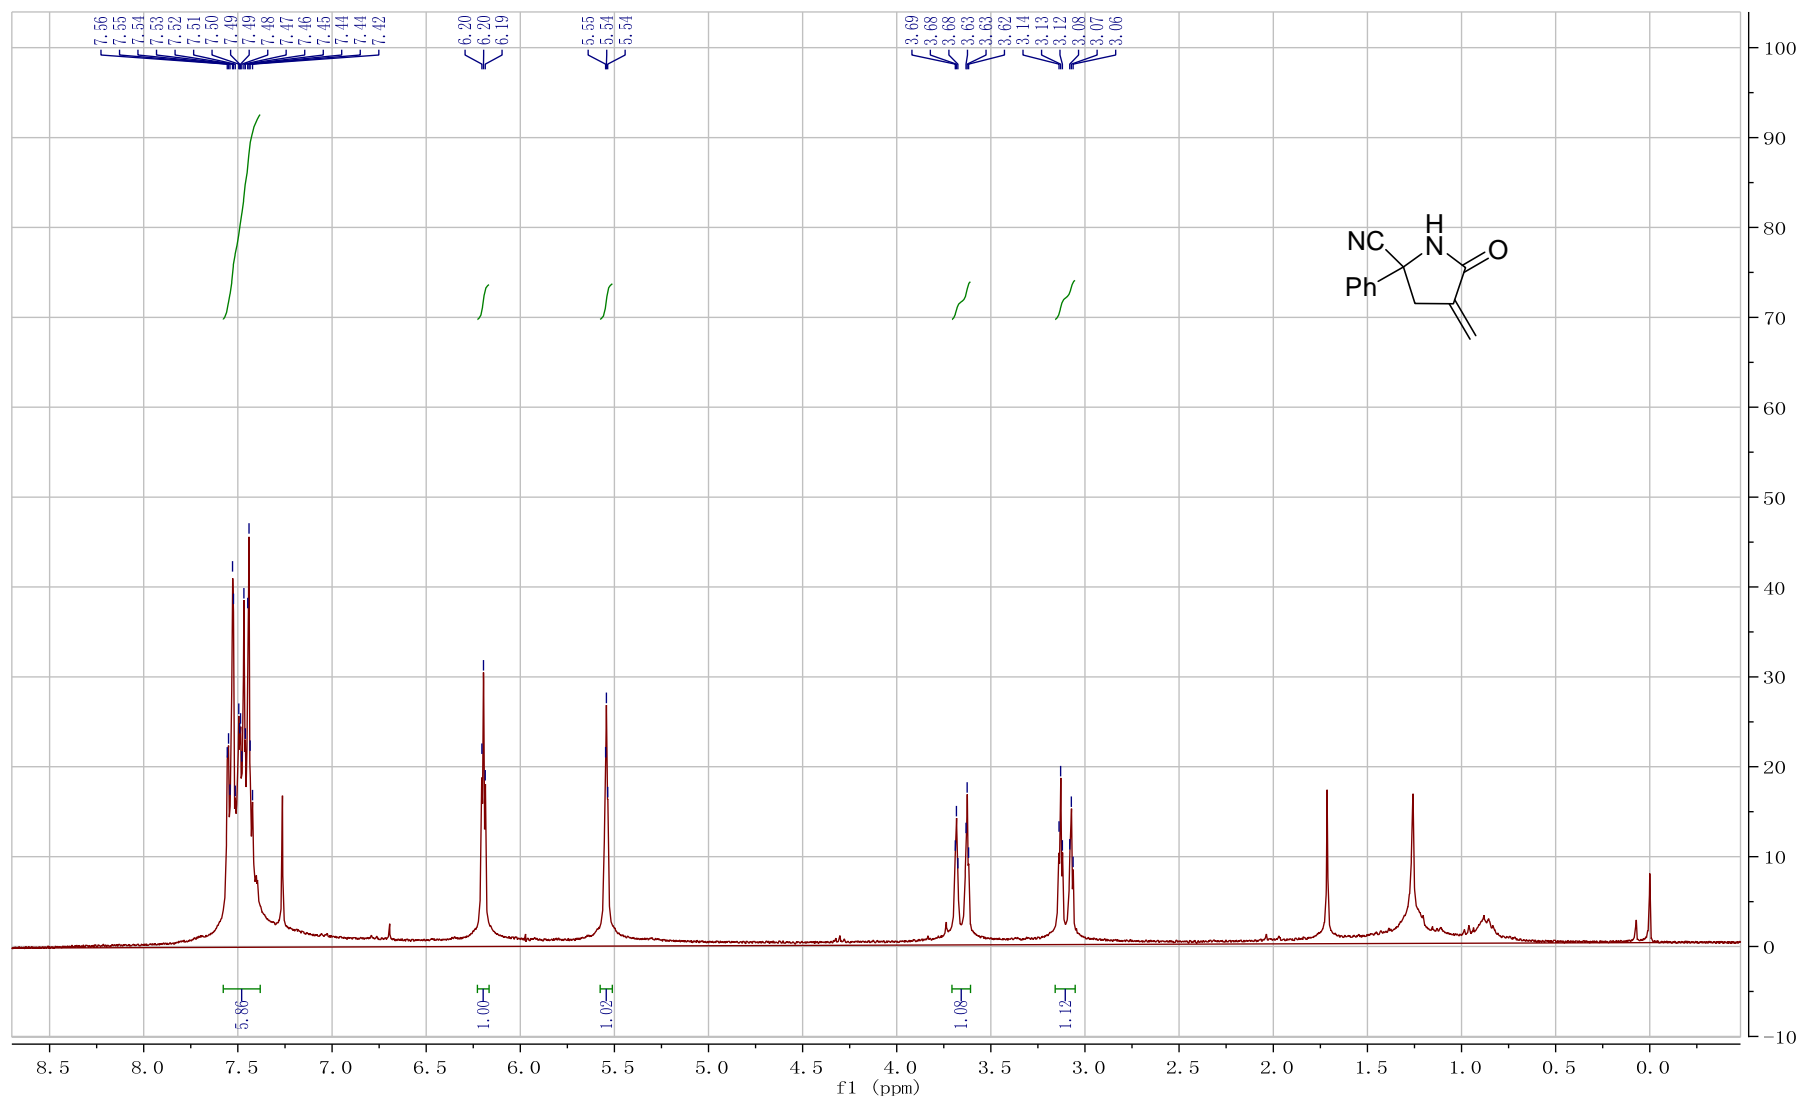

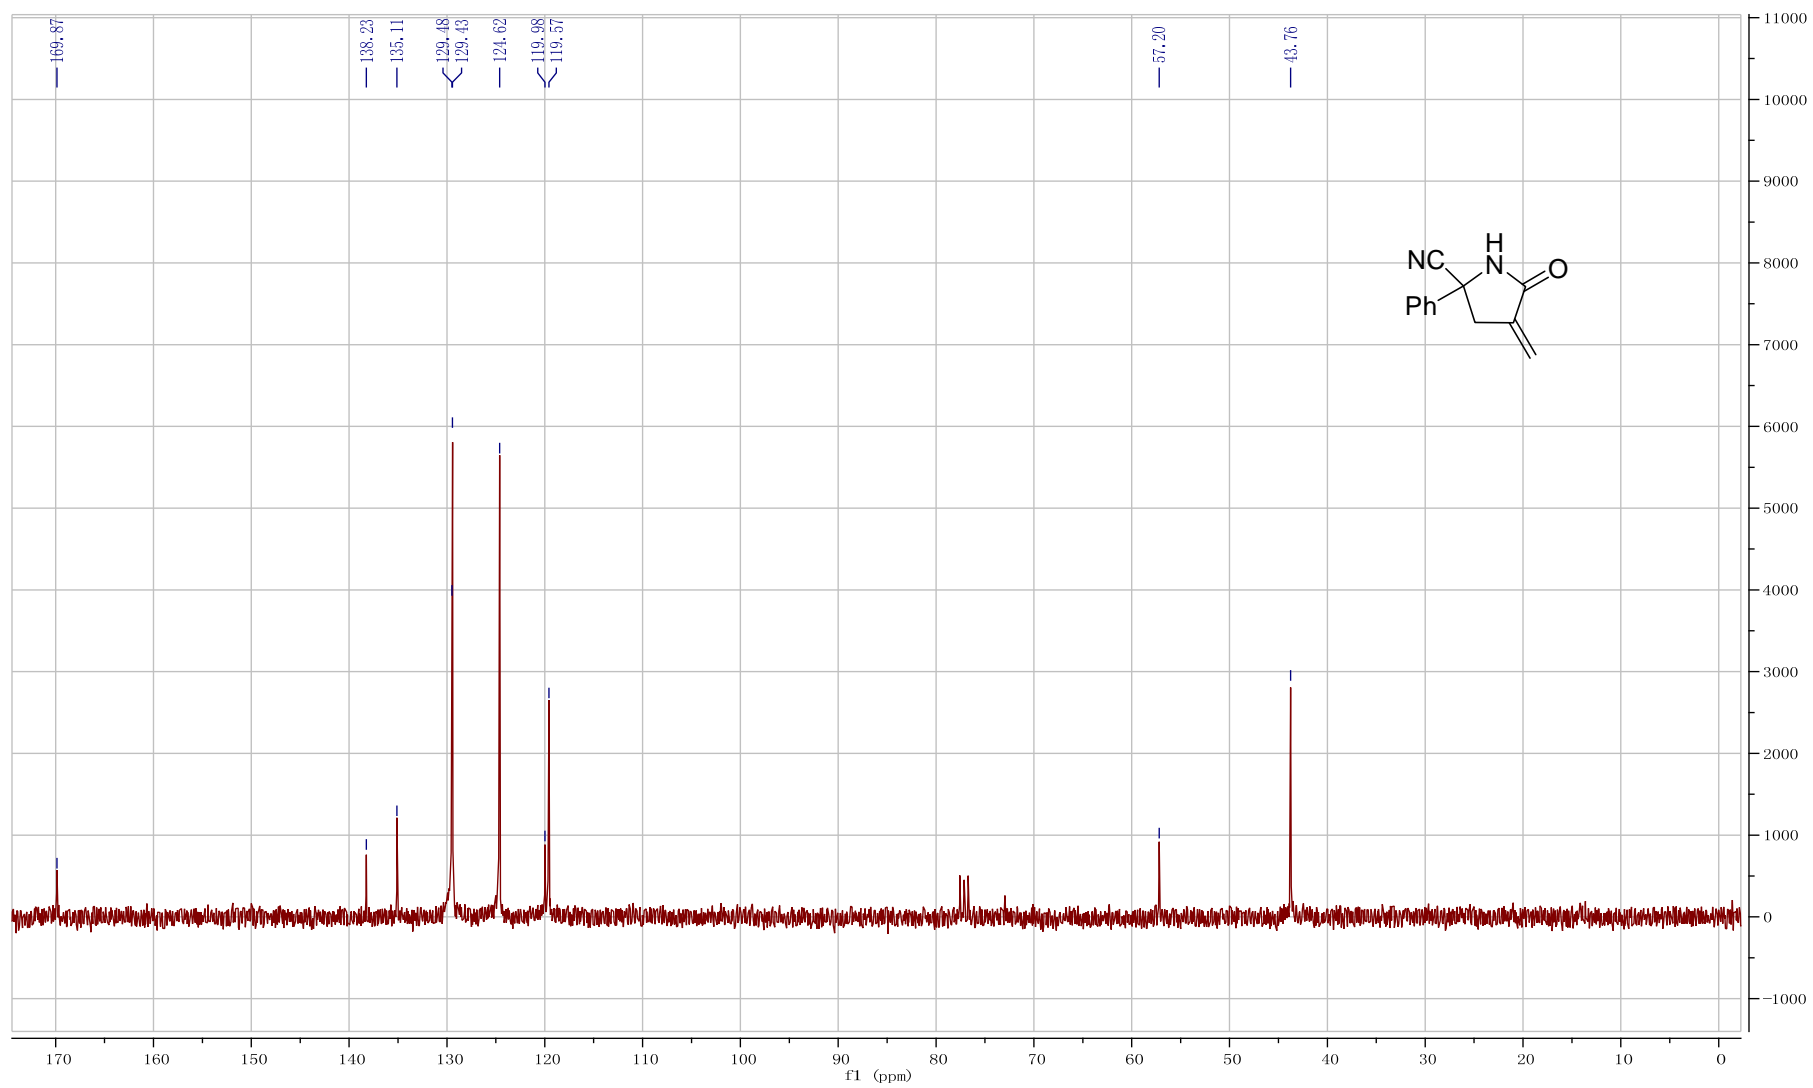

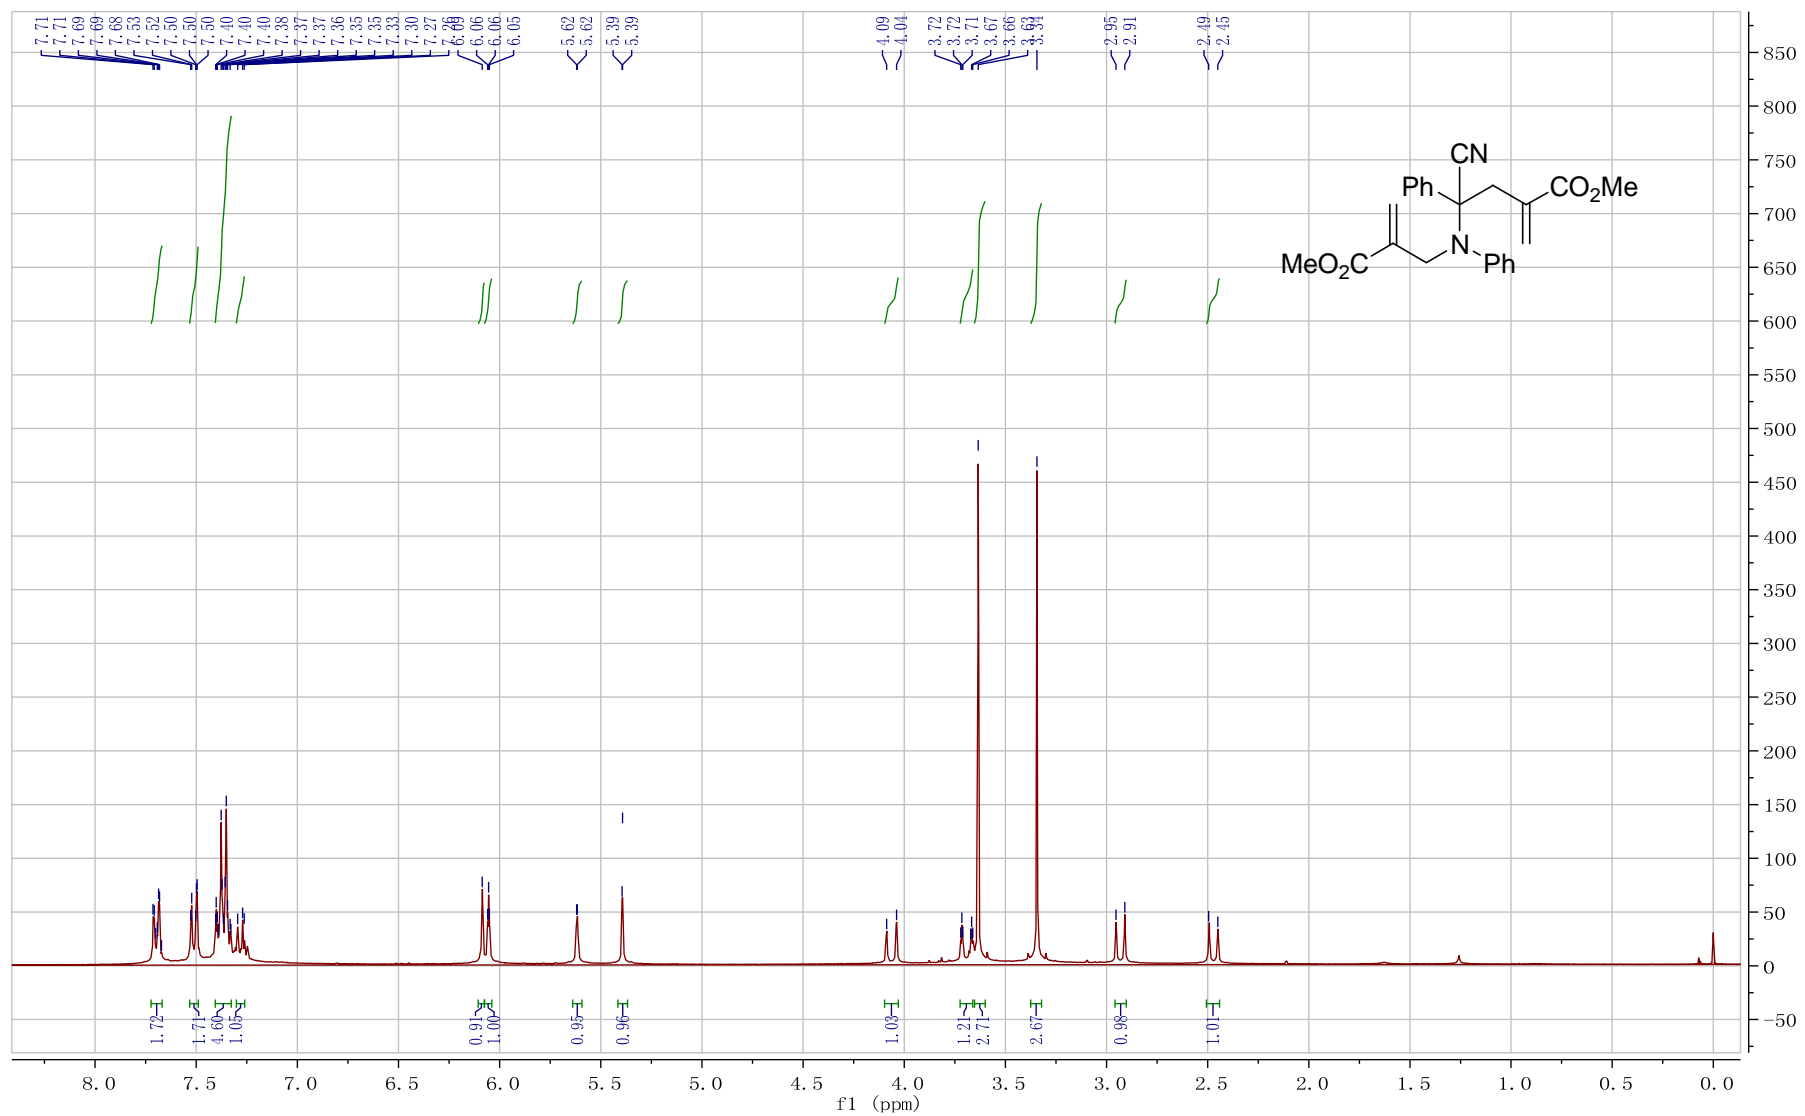

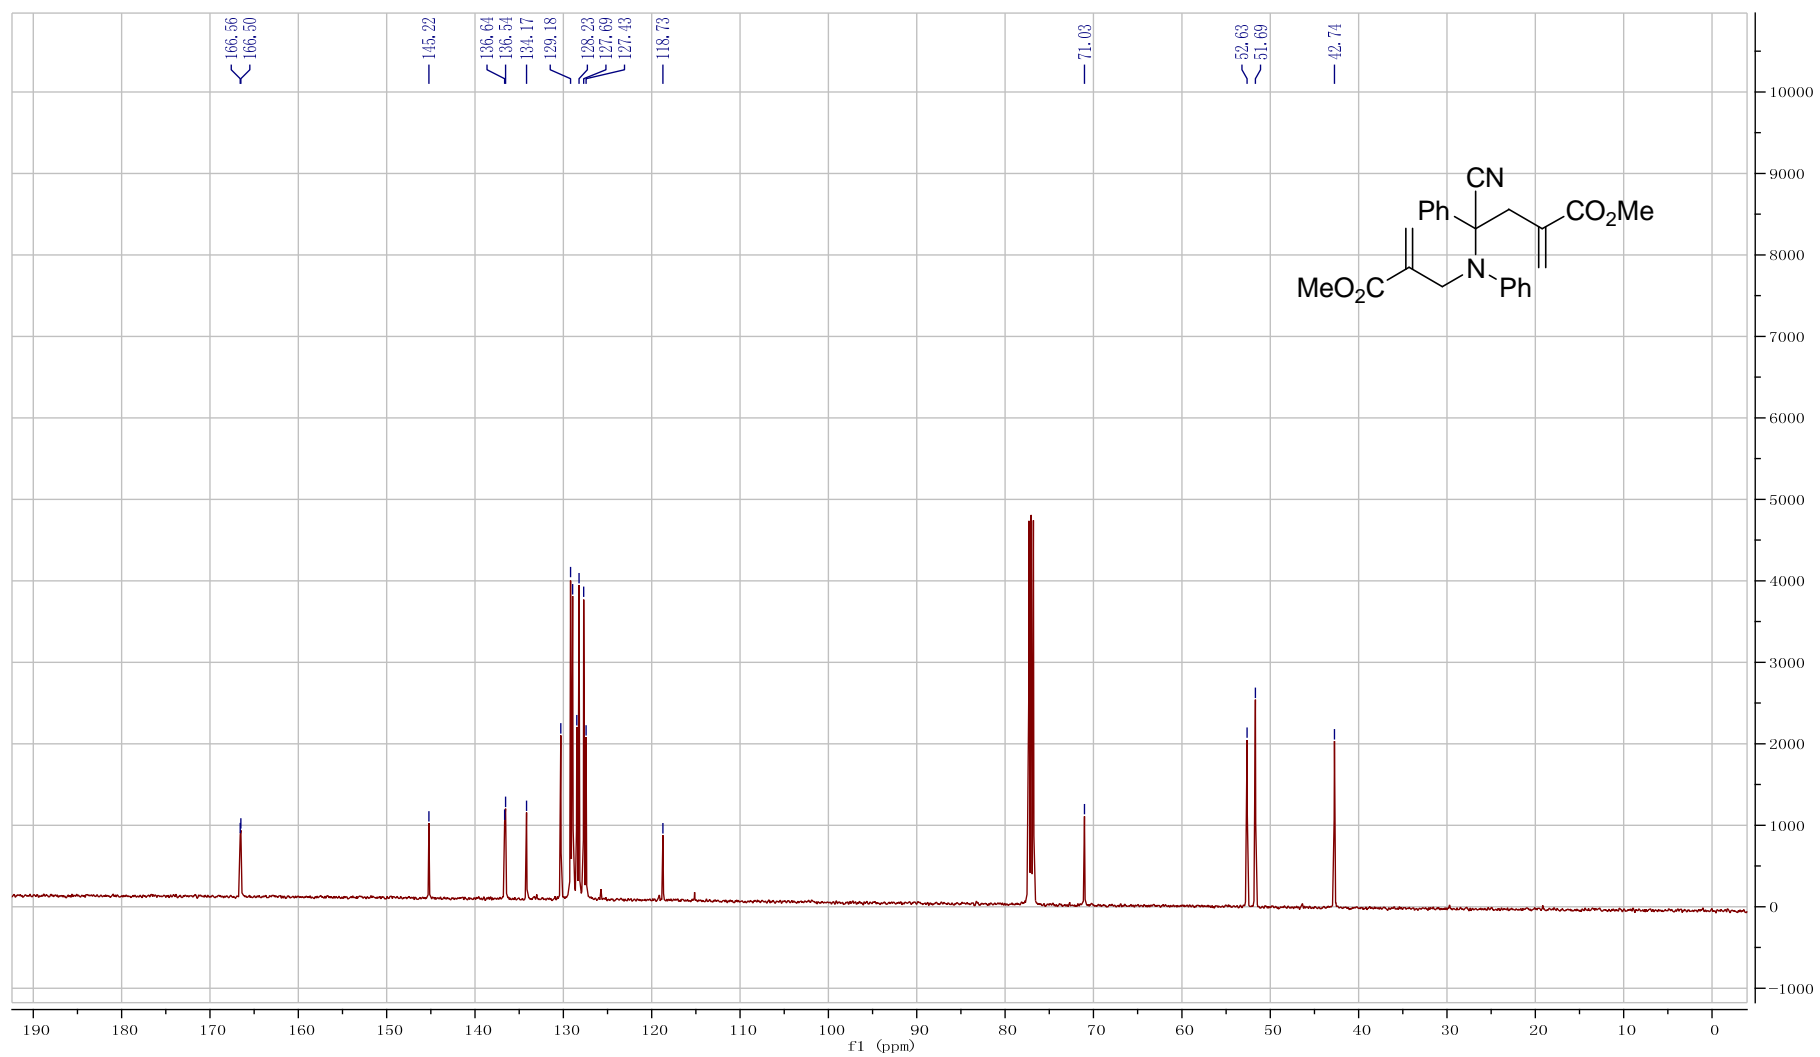

Supplement: c2ob07112f_2.pdf [file c2ob07112f_2.pdf]
