# Supplementary material for: Construction of highly functional α-amino nitriles via a novel multicomponent tandem organocatalytic reaction: a facile access to α-methylene γ-lactams
Source: Royal Society of Chemistry journal article supplement (doi:10.1039/c2ob07112f), 2012-01-01
Supplement: c2ob07112f.pdf [file c2ob07112f.pdf]

## Supporting Information

### Construction of Highly Functional $\alpha$ -Amino Nitriles *via* a Novel Multicomponent Tandem Organocatalytic Reaction: a Facile Access to $\alpha$ -Methylene $\gamma$ -Lactams

Feng Pan, Jian-Ming Chen, Zhe Zhuang, Yin-Zhi Fang, Sean Xiao-An Zhang and Wei-Wei Liao\*

Department of Organic Chemistry, College of Chemistry, Jilin University, 2699 Qianjin Street, Changchun 130012, China. E-mail: wliao@jlu.edu.cn; Tel: 0431-85168420;

#### Table of Contents

#### I. General Information

#### II. Preparation of Substrates

#### III. General Procedure for Screening Reaction

#### IV. General Procedure for Tandem Organocatalytic Strecker-Allylic-Alkylation Reaction

#### V. General Procedure for the Synthesis of $\alpha$ -Methylene- $\gamma$ -Butyrolactones

#### VI. Procedure for Chemical Transformations

#### VII. NMR Spectra

#### VIII. References

#### I. General Information

Flasks and reaction tubes were sealed with rubber plugs. Reactions were monitored by thin-layer chromatography (TLC) visualizing with ultraviolet light (UV),  $\text{KMnO}_4$ , iodine, *p*-anisaldehyde stain, and phosphomolybdic acid (PMA) stain. Organic solutions were concentrated under reduced pressure using a rotary evaporator with an ice-water bath. Column chromatography was performed using silica gel (200-300) mesh.

**Materials.** All reagents were obtained commercially and used without further purification with the following exceptions. Dichloromethane (DCM), toluene, acetonitrile ( $\text{CH}_3\text{CN}$ ), and *tert*-butyl alcohol (*t*-BuOH) were dried by distillation from  $\text{CaH}_2$ ; tetrahydrofuran (THF) and 1,4-Dioxane were dried by distillation from Na; benzaldehyde and furaldehyde were purified by distillation at reduced pressure; 1,4-diazabicyclo[2.2.2]octane (DABCO) was purified by recrystallization; triethylamine (TEA) was purified by distillation from  $\text{CaH}_2$ .

**Instrumentation.** Proton nuclear magnetic resonance ( $^1\text{H}$  NMR) spectra and carbon nuclear magnetic resonance ( $^{13}\text{C}$  NMR) spectra were recorded on a Varian Mercury (300 or 400 and 75 or 100 MHz, respectively). Chemical shifts for protons are reported in parts per million downfield from tetramethylsilane (TMS) and are referenced to residual protium in the NMR solvent ( $\text{CHCl}_3$  =  $\delta$  7.26). Chemical shifts for carbon are reported in parts per million downfield from tetramethylsilane (TMS) and are referenced to the carbon resonances of the solvent residual peak ( $\text{CDCl}_3$  =  $\delta$  77.16 ppm). NMR data are presented as follows: chemical shift ( $\delta$  ppm), multiplicity

(s = singlet, d = doublet, t = triplet, q = quartet, m = multiplet, br = broad), coupling constant in Hertz (Hz), integration.

Mass spectra were in general recorded on the Bruker MicrOTOF Q II.

## II. Preparation of Substrates

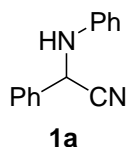

$\alpha$ -Aminonitriles (**1a**) was prepared according to a published procedure<sup>1</sup>; the spectral data were in agreement with literature values.

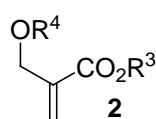

MBH carbonates **2** were prepared according to a published procedure<sup>2,3,4</sup>, spectral data were in agreement with literature values.

## III. General Procedure for Screening Reaction

To a dried reaction tube were added **1a** (0.3 mmol), DABCO (20%), CH<sub>3</sub>CN (3 ml) and **2** (0.45 mmol). The mixture was stirred at 30 °C and the reaction was monitored by TLC. Upon completion, the stirring bar was removed and the mixture was evaporated under reduced pressure to give the crude products. The crude mixture was purified by column chromatography (silica gel, EtOAc/Petroleum) to provide following compounds.

**Table 1 Optimization of Lewis base-Catalyzed Direct Allylic Alkylation of  $\alpha$ -Amino Nitrile **1a** with MBH Carbonate **2**<sup>a</sup>**

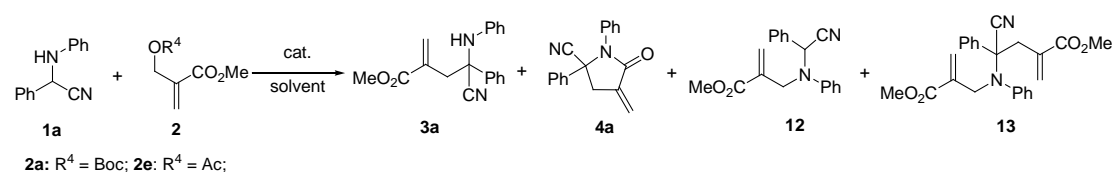

| entry          | catalyst | solvent            | <i>t</i> (h) | yield (%) <sup>b</sup>                        |
|----------------|----------|--------------------|--------------|-----------------------------------------------|
| 1              | DABCO    | PhCH <sub>3</sub>  | 4            | 52( <b>3a</b> ); 14( <b>13</b> )              |
| 2              | DABCO    | DCM                | 9            | 50( <b>3a</b> ); 18( <b>13</b> )              |
| 3              | DABCO    | THF                | 4            | 36( <b>3a</b> ); 33( <b>13</b> )              |
| 4              | DABCO    | CHCl <sub>3</sub>  | 22           | 40( <b>3a</b> ); 43( <b>12</b> ) <sup>e</sup> |
| 5              | DABCO    | 1,4-dioxane        | 15           | 62( <b>3a</b> )                               |
| 6              | DABCO    | <i>t</i> -BuOH     | 9            | 56( <b>3a</b> )                               |
| 7              | DABCO    | DMF                | 2            | 79( <b>3a</b> ); 5( <b>4a</b> )               |
| 8              | DABCO    | CH <sub>3</sub> CN | 3.5          | 32( <b>3a</b> ); 50( <b>4a</b> )              |
| 9 <sup>c</sup> | DABCO    | CH <sub>3</sub> CN | 14           | 93( <b>3a</b> )                               |

|                 |                   |                    |     |                                  |
|-----------------|-------------------|--------------------|-----|----------------------------------|
| 10 <sup>d</sup> | DABCO             | CH <sub>3</sub> CN | 22  | 35( <b>3a</b> )                  |
| 11              | DMAP              | CH <sub>3</sub> CN | 2.5 | 44( <b>3a</b> ); 50( <b>4a</b> ) |
| 12              | Ph <sub>3</sub> P | CH <sub>3</sub> CN | 2.5 | 50( <b>3a</b> )                  |

<sup>a</sup> Unless otherwise noted, reactions were performed with 0.3 mmol of **1a**, 0.45 mmol of **2a**, and 20 mol % of catalyst in 3.0 mL of solvent at 30 °C. <sup>b</sup> Isolated yield. <sup>c</sup> 4 Å molecular sieve was added and the reaction was performed at 0 °C. <sup>d</sup> MBH acetate **2e** (0.45 mmol) was employed. <sup>e</sup> Based on <sup>1</sup>H NMR of the mixture **1a** and **12** which can't be separated by column chromatography.

#### IV. General Procedure for Tandem Organocatalytic Strecker-Allylic-Alkylation Reaction

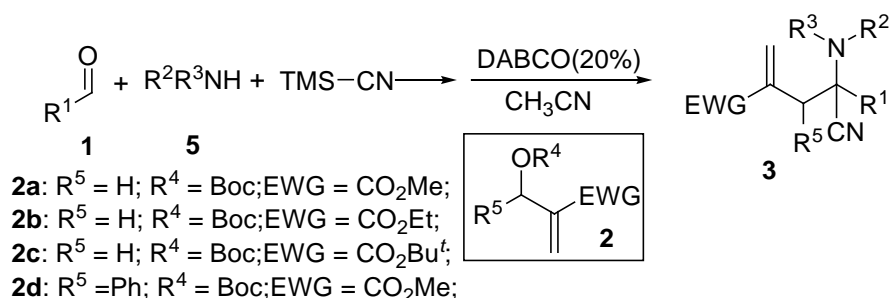

To a dried reaction tube were added aldehyde (0.3 mmol) and amine (0.315 mmol). After the mixture was stirred at rt for 10 min, TMSCN (0.33 mmol) was added, and the mixture was vigorously stirred. <sup>1</sup> After 50 min, CH<sub>3</sub>CN (3 ml), DABCO (20%) and compound **2** (0.45 mmol) were added. The reaction was monitored by TLC. Upon completion, the stirring bar was removed and the mixture was evaporated under reduced pressure to give the crude products. The crude mixture was purified by column chromatography (silica gel, EtOAc/Petroleum) to provide **3**.

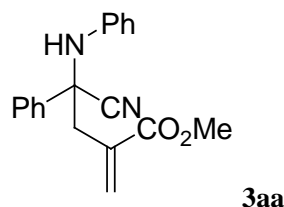

**3aa:** This compound was synthesized according to the general procedure and was purified by flash chromatography (silica gel, EtOAc/Petroleum = 1:12), which afforded 87 mg of a white solid. (95%, yield). mp 118 -119 °C. <sup>1</sup>H NMR (300 MHz, CDCl<sub>3</sub>) 7.61-7.58 (m, 2H), 7.42 - 7.34 (m, 3H), 7.11 - 7.06 (m, 2H), 6.76-6.71 (m, 1H), 6.52 – 6.47 (m, 2H), 6.46 - 6.44 (m, 1H), 5.86 (br,1H), 5.73 - 5.72 (m, 1H), 3.82 (s, 3H), 3.08 (d, *J* = 13.8 Hz, 1H), 3.01 (d, *J* = 13.8 Hz, 1H). <sup>13</sup>C NMR (75 MHz, CDCl<sub>3</sub>) δ 168.60, 143.40, 138.07, 133.19, 132.82, 128.91, 128.77, 128.63, 125.66, 119.16, 119.04, 115.09, 61.98, 52.56, 46.14. IR (KBr): 3371, 3065, 3028, 2925, 2869, 2245, 1726, 1632, 1607, 1527, 1499, 1321, 1203, 756, 732, 696 cm<sup>-1</sup>. HRMS (ESI): HRMS (ESI): calcd. for C<sub>19</sub>H<sub>18</sub>N<sub>2</sub>O<sub>2</sub>Na ([M+Na]<sup>+</sup>): 329.1260, found 329.1258.

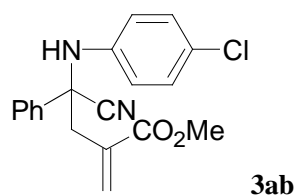

**3ab:** This compound was prepared according to the general procedure and was purified by flash chromatography (silica gel, EtOAc/Petroleum = 1:12), which afforded 87 mg of a white amorphous solid (85%, yield).  $^1\text{H}$  NMR (300 MHz,  $\text{CDCl}_3$ )  $\delta$  7.57-7.54 (m, 2H), 7.43-7.35 (m, 3H), 7.03 (d,  $J$  = 8.7 Hz, 2H), 6.46 (s, 1H), 6.42 (d,  $J$  = 8.6 Hz, 2H), 6.07 (br, 1H), 5.74 (s, 1H), 3.83 (s, 3H), 3.06 (d,  $J$  = 13.9 Hz, 1H), 2.98 (d,  $J$  = 13.9 Hz, 1H).  $^{13}\text{C}$  NMR (75 MHz,  $\text{CDCl}_3$ )  $\delta$  168.79, 142.03, 137.61, 133.10, 133.00, 129.01, 128.79, 128.65, 125.55, 123.79, 118.88, 116.16, 62.05, 52.66, 46.10. IR (KBr): 3357, 3063, 2951, 2928, 2229, 1727, 1630, 1600, 1493, 1446, 1310, 1203, 818, 735, 698  $\text{cm}^{-1}$ . HRMS (ESI): calcd. for  $\text{C}_{19}\text{H}_{18}\text{ClN}_2\text{O}_2$  ( $[\text{M}+\text{H}]^+$ ): 341.1051, found 341.1052.

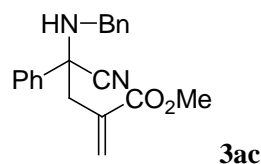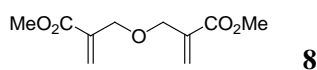

**3ac:** This compound was prepared according to the general procedure and was purified by flash chromatography (silica gel, EtOAc/Petroleum = 1:12), which afforded a oil (inseparate mixture of **3ac** (77%, yield) and ether **8** ( $\text{3ac}/\text{8}$  = 7.2/1, based on  $^1\text{H}$  NMR).  $^1\text{H}$  NMR (300 MHz,  $\text{CDCl}_3$ )  $\delta$  7.67 – 7.63 (m, 2H), 7.43 – 7.24 (m, 8H), 6.28 (s, 1H), 5.45 (s, 1H), 3.86 (d,  $J$  = 12.5 Hz, 1H), 3.67-2.52 (m, 1H), 3.62 (s, 3H), 3.14 (d,  $J$  = 13.5 Hz, 1H), 2.94 (d,  $J$  = 13.5 Hz, 1H), 2.16 (br, 1H). HRMS (ESI): calcd. for  $\text{C}_{20}\text{H}_{20}\text{N}_2\text{O}_2\text{Na}$  ( $[\text{M}+\text{H}]^+$ ): 343.1417, found 343.1410.

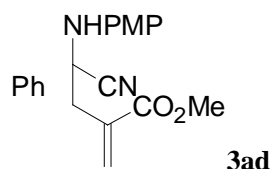

**3ad:** This compound was prepared according to the general procedure and was purified by flash chromatography (silica gel, EtOAc/Petroleum = 1:13), which afforded 97 mg of a white solid (96%, yield). mp 105 -107  $^{\circ}\text{C}$ .  $^1\text{H}$  NMR (300 MHz,  $\text{CDCl}_3$ )  $\delta$  7.61-7.57 (m, 2H), 7.42-7.34 (m, 3H), 6.68 – 6.65 (m, 2H), 6.47 – 6.44 (m, 2H), 6.43-6.41 (m, 1H), 5.67-5.66 (m, 1H), 5.42 (br, 1H), 3.80 (s, 3H), 3.68 (s, 3H), 3.04 (s, 2H).  $^{13}\text{C}$  NMR (75 MHz,  $\text{CDCl}_3$ )  $\delta$  163.25, 148.08, 133.11, 132.22, 128.24, 127.29, 123.76, 123.53, 120.77, 114.39, 111.70, 109.25, 57.69, 50.48, 47.56, 40.85. IR (KBr): 3378, 3034, 2929, 2854, 2227, 1724, 1629, 1521, 1512, 1464, 1461, 1246, 1170, 813, 746, 693  $\text{cm}^{-1}$ . HRMS (ESI): calcd. for  $\text{C}_{20}\text{H}_{21}\text{N}_2\text{O}_3$  ( $[\text{M}+\text{H}]^+$ ): 337.1547, found 337.1541.

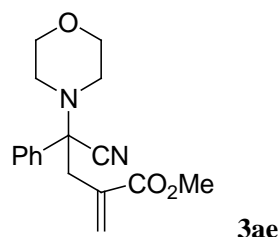

This compound was prepared according to the general procedure, except that **2** (3.0 eq) was added before the excess of TMS-CN was evaporated under reduced pressure when the first step was finished. The product was purified by flash chromatography (silica gel, EtOAc/Petroleum = 1:12), which afforded 60 mg of a white solid (67%, yield). mp 56 – 59 °C. <sup>1</sup>H NMR (300 MHz, CDCl<sub>3</sub>) δ 7.51 - 7.48 (m, 2H), 7.35 – 7.31 (m, 3H), 6.13 (s, 1H), 5.49 (s, 1H), 3.82 – 3.69 (m, 4H), 3.43 (s, 3H), 3.20 (d, *J* = 12.9 Hz, 1H), 2.97 (d, *J* = 12.9 Hz, 1H), 2.76-2.73 (m, 2H), 2.56-2.50 (m, 2H). <sup>13</sup>C NMR (75 MHz, CDCl<sub>3</sub>) δ 161.40, 130.55, 129.05, 124.86, 123.60, 123.19, 122.47, 111.36, 66.13, 61.66, 46.58, 43.55, 34.60. IR (KBr): 3002, 2959, 2891, 2852, 2217, 1721, 1631, 1487, 1246, 1202, 724, 703 cm<sup>-1</sup>. HRMS (ESI): calcd. for C<sub>17</sub>H<sub>21</sub>N<sub>2</sub>O<sub>3</sub> ([M+H]<sup>+</sup>): 301.1547, found 301.1544.

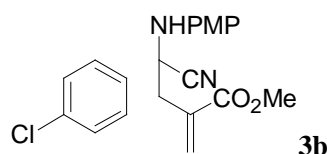

**3b**: This compound was prepared according to the general procedure and was purified by flash chromatography (silica gel, EtOAc/Petroleum = 1:13), which afforded 78 mg of a white solid (70%, yield). mp 90 -91 °C. <sup>1</sup>H NMR (300 MHz, CDCl<sub>3</sub>) δ 7.53 (d, *J* = 8.6 Hz, 2H), 7.36 (d, *J* = 8.6 Hz, 2H), 6.67 (d, *J* = 8.9 Hz, 2H), 6.45 – 6.43 (m, 3H), 5.67 (s, 1H), 5.44 (s, 1H), 3.79 (s, 3H), 3.68 (s, 3H), 3.02 (s, 2H). <sup>13</sup>C NMR (75 MHz, CDCl<sub>3</sub>) δ 168.27, 153.22, 136.89, 136.79, 134.48, 133.01, 132.70, 128.99, 127.34, 119.05, 116.74, 114.33, 62.11, 55.36, 52.52, 45.77. IR (KBr): 3336, 3045, 2938, 2838, 1724, 1512, 1487, 1314, 1248, 1199, 815, 772 cm<sup>-1</sup>. HRMS (ESI): calcd. For C<sub>20</sub>H<sub>19</sub>ClN<sub>2</sub>O<sub>3</sub>Na ([M+Na]<sup>+</sup>): 393.0976, found 393.0972.

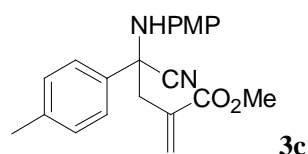

**3c**: This compound was prepared according to the general procedure and was purified by flash chromatography (silica gel, EtOAc/Petroleum = 1:12), which afforded 95 mg of a white solid (91%, yield). mp 70 - 72 °C. <sup>1</sup>H NMR (300 MHz, CDCl<sub>3</sub>) δ 7.46 (d, *J* = 8.2 Hz, 2H), 7.18 (d, *J* = 8.2 Hz, 2H), 6.68 – 6.64 (m, 2H), 6.49 – 6.44 (m, 2H), 6.42 (s, 1H), 5.67 (s, 1H), 5.38 (br, 1H), 3.79 (s, 3H), 3.68 (s, 3H), 3.02 (s, 2H), 2.35 (s, 3H). <sup>13</sup>C NMR (75 MHz, CDCl<sub>3</sub>) δ 168.41, 153.16, 138.49, 137.46, 135.29, 133.44, 132.41, 129.53, 125.79, 119.60, 116.82, 114.35, 62.47, 55.43, 52.48, 46.06, 20.99. IR (KBr): 3371, 3033, 2951, 2857, 1732, 1511, 1248, 1203, 814, 774 cm<sup>-1</sup>. HRMS (ESI): calcd. for C<sub>21</sub>H<sub>22</sub>N<sub>2</sub>O<sub>3</sub>Na ([M+Na]<sup>+</sup>): 373.1523, found 373.1521.

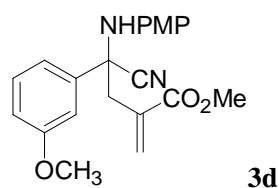

**3d:** This compound was prepared according to the general procedure and was purified by flash chromatography (silica gel, EtOAc/Petroleum = 1:12), which afforded 87 mg of a colourless oil (79%, yield).  $^1\text{H}$  NMR (300 MHz,  $\text{CDCl}_3$ )  $\delta$  7.30 (t,  $J$  = 7.9 Hz, 1H), 7.20-7.18 (m, 1H), 7.14-7.12 (m, 1H), 6.87 (dd,  $J$  = 8.0, 2.4 Hz, 1H), 6.69 – 6.66 (m, 2H), 6.49 – 6.46 (m, 2H), 6.44(s, 1H), 5.71 (s, 1H), 5.43 (br, 1H), 3.80 (s, 3H), 3.79 (s, 3H), 3.68 (s, 3H), 3.08 – 2.98 (m, 2H).  $^{13}\text{C}$  NMR (75 MHz,  $\text{CDCl}_3$ )  $\delta$  168.50, 160.03, 153.25, 140.08, 137.36, 133.41, 132.50, 129.96, 119.38, 118.06, 116.75, 114.35, 114.02, 111.55, 62.69, 55.44, 55.27, 52.52, 45.97. IR (film): 3365, 3057, 2838, 2229, 1706, 1511, 1488, 1243, 1199, 825, 739  $\text{cm}^{-1}$ . HRMS (ESI): calcd. for  $\text{C}_{21}\text{H}_{22}\text{N}_2\text{O}_4\text{Na}$  ( $[\text{M}+\text{Na}]^+$ ): 389.1472, found 389.1475.

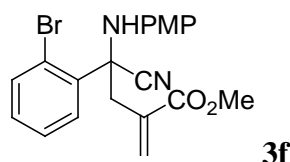

**3f:** This compound was prepared according to the general procedure except that the excess of TMSCN was evaporated under reduced pressure after the 1<sup>st</sup> step Strecker reaction was run for 4 h. The product was purified by flash chromatography (silica gel, EtOAc/Petroleum = 1:12), which afforded a inseparate mixture of **3f** (78%, yield) and  $\alpha$ -amino nitrile **9** which was generated from 2-Bromobenzaldehyde, *p*-anisidine and TMSCN (**3f**/**9** = 8.4/1, based on  $^1\text{H}$  NMR).  $^1\text{H}$  NMR (300 MHz,  $\text{CDCl}_3$ )  $\delta$  7.73 – 7.63 (m, 2H), 7.34 – 7.28 (m, 1H), 7.24 – 7.18 (m, 1H), 6.72 – 6.66 (m, 2H), 6.51 – 6.46 (m, 3H), 5.89-5.87 (m, 2H), 3.84 (s, 3H), 3.69 (s, 3H), 3.40 (d,  $J$  = 13.5 Hz, 1H), 3.22 (d,  $J$  = 13.9 Hz, 1H). HRMS (ESI): calcd. for  $\text{C}_{20}\text{H}_{20}\text{BrN}_2\text{O}_3$  ( $[\text{M}+\text{H}]^+$ ): 415.0652, found 415.0647.

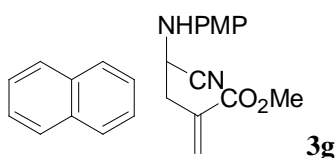

**3g:** This compound was prepared according to the general procedure and was purified by flash chromatography (silica gel, EtOAc/Petroleum = 1:12), which afforded 96 mg of a white solid (83%, yield). mp 103-104  $^\circ\text{C}$ .  $^1\text{H}$  NMR (300 MHz,  $\text{CDCl}_3$ )  $\delta$  8.09 (s, 1H), 7.87-7.82 (m, 3H), 7.69-7.66 (m, 1H), 7.52-7.49 (m, 2H), 6.63 (d,  $J$  = 8.9 Hz, 2H), 6.50 (d,  $J$  = 8.9 Hz, 2H), 6.42 (s, 1H), 5.69 (s, 1H), 5.51 (s, 1H), 3.73 (s, 3H), 3.64 (s, 3H), 3.15 (d,  $J$  = 13.8 Hz, 1H), 3.09 (d,  $J$  = 13.8 Hz, 1H).  $^{13}\text{C}$  (75 MHz,  $\text{CDCl}_3$ )  $\delta$  168.39, 153.34, 137.45, 135.88, 133.50, 133.28, 133.05, 132.59, 129.03, 128.30, 127.65, 126.73, 126.64, 125.51, 123.09, 119.56, 117.03, 114.45, 63.02, 55.42, 52.49, 45.91. IR (KBr): 3402, 3062, 2955, 2852, 1657, 1513, 1242, 1174, 818  $\text{cm}^{-1}$ . HRMS (ESI): calcd. for  $\text{C}_{24}\text{H}_{22}\text{N}_2\text{O}_3\text{Na}$  ( $[\text{M}+\text{Na}]^+$ ): 409.1523, found 409.1519.

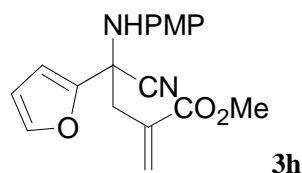

**3h:** This compound was prepared according to the general procedure and was purified by flash chromatography (silica gel, EtOAc/Petroleum = 1:13), which afforded 74 mg of a yellow oil (76%, yield).  $^1\text{H}$  NMR (300 MHz,  $\text{CDCl}_3$ )  $\delta$  7.44 (dd,  $J$  = 1.7, 0.8 Hz, 1H), 6.74 – 6.70 (m, 2H), 6.66 – 6.63 (m, 2H), 6.45–6.43 (m, 1H), 6.39 (dd,  $J$  = 3.3, 0.8 Hz, 1H), 6.33 (dd,  $J$  = 3.3, 1.8 Hz, 1H), 5.73–5.71 (m, 1H), 4.90 (br, 1H), 3.79 (s, 3H), 3.71 (s, 3H), 3.26 (d,  $J$  = 13.8 Hz, 2H), 3.15 (d,  $J$  = 13.8 Hz, 2H).  $^{13}\text{C}$  NMR (75 MHz,  $\text{CDCl}_3$ )  $\delta$  167.86, 154.24, 149.21, 143.04, 136.94, 133.14, 131.93, 118.78, 117.77, 114.24, 110.54, 109.81, 58.76, 55.35, 52.44, 42.05. IR (film): 3062, 3035, 2954, 2192, 1718, 1650, 1509, 1150, 819  $\text{cm}^{-1}$ . HRMS (ESI): calcd. for  $\text{C}_{18}\text{H}_{19}\text{N}_2\text{O}_4$  ( $[\text{M}+\text{H}]^+$ ): 327.1339, found 327.1338.

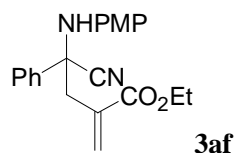

**3af:** This compound was prepared according to the general procedure and was purified by flash chromatography (silica gel, EtOAc/Petroleum = 1:12), which afforded 100 mg of a white solid (95%, yield). mp 80 – 82  $^{\circ}\text{C}$ .  $^1\text{H}$  NMR (300 MHz,  $\text{CDCl}_3$ )  $\delta$  7.61–7.58 (m, 2H), 7.42 – 7.33 (m, 3H), 6.68–6.64 (m, 2H), 6.47–6.43 (m, 3H), 5.66 (s, 1H), 5.50 (br, 1H), 4.25 (q,  $J$  = 7.1 Hz, 2H), 3.68 (s, 3H), 3.04 (s, 2H), 1.33 (t,  $J$  = 7.1 Hz, 3H).  $^{13}\text{C}$  NMR (75 MHz,  $\text{CDCl}_3$ )  $\delta$  168.04, 153.15, 138.45, 137.37, 133.63, 132.24, 128.87, 128.60, 125.85, 119.48, 116.71, 114.38, 62.68, 61.68, 55.54, 46.00, 14.05. IR (KBr): 3376, 2997, 2832, 2231, 1718, 1627, 1518, 1240, 1189, 829, 759, 698  $\text{cm}^{-1}$ . HRMS (ESI): calcd. for  $\text{C}_{21}\text{H}_{22}\text{N}_2\text{O}_3\text{Na}$  ( $[\text{M}+\text{Na}]^+$ ): 373.1523, found 373.1521.

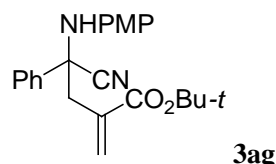

**3ag:** This compound was prepared according to the general procedure and was purified by flash chromatography (silica gel, EtOAc/Petroleum = 1:12), which afforded 106 mg of a white solid (94%, yield). mp 93 – 95  $^{\circ}\text{C}$ .  $^1\text{H}$  NMR (300 MHz,  $\text{CDCl}_3$ ) 7.61–7.58 (m, 2H), 7.42 – 7.33 (m, 3H), 6.68 – 6.65 (m, 2H), 6.45 – 6.42 (m, 2H), 6.34 (s, 1H), 5.64 (s, 1H), 5.58 (br, 1H), 3.67 (s, 3H), 3.02 (d,  $J$  = 13.7 Hz, 1H), 2.96 (d,  $J$  = 13.8 Hz, 1H), 1.53 (s, 9H).  $^{13}\text{C}$  NMR (75 MHz,  $\text{CDCl}_3$ )  $\delta$  167.46, 153.13, 138.70, 137.58, 135.01, 131.54, 128.95, 128.61, 125.85, 119.55, 116.58, 114.47, 82.17, 62.84, 55.52, 45.94, 27.99. IR (KBr): 3381, 3065, 3031, 2949, 2234, 1709, 1626, 1525, 1507, 1246, 1161, 818, 754, 692  $\text{cm}^{-1}$ . HRMS (ESI): calcd. for  $\text{C}_{23}\text{H}_{26}\text{N}_2\text{O}_3\text{Na}$  ( $[\text{M}+\text{Na}]^+$ ): 401.1836, found 401.1834.

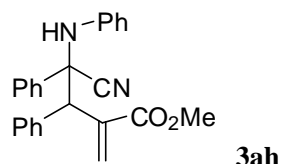

**3ah:** This compound was prepared according to the general procedure and was purified by flash chromatography (silica gel, EtOAc/Petroleum = 1:10), which afforded a crude product which was recrystallized to provide a white solid (9%, yield). mp 167-168 °C. <sup>1</sup>H NMR (300 MHz, CDCl<sub>3</sub>) δ 7.63 – 7.62 (m, 4H), 7.45 – 7.34 (m, 6H), 7.03 (t, *J* = 7.8 Hz, 2H), 6.75 (t, *J* = 7.3 Hz, 1H), 6.55 (s, 1H), 6.36 (d, *J* = 8.0 Hz, 2H), 6.33 (s, 1H), 4.76 (s, 1H), 4.48 (s, 1H), 3.42 (s, 3H). IR (KBr): 3373, 3113, 3060, 2872, 2241, 1726, 1631, 1602, 1500, 1450, 1248, 1146, 750, 698 cm<sup>-1</sup>. HRMS (ESI): calcd. for C<sub>25</sub>H<sub>23</sub>N<sub>2</sub>O<sub>2</sub> ([M+H]<sup>+</sup>): 383.1754, found 383.1747.

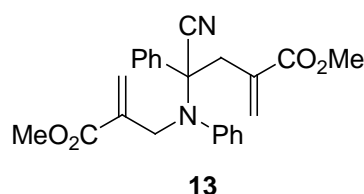

**13:** (see Table 1); mp 91-94 °C. <sup>1</sup>H NMR (300 MHz, CDCl<sub>3</sub>) δ 7.71 – 7.67 (m, 2H), 7.53 – 7.50 (m, 2H), 7.40 – 7.33 (m, 5H), 7.30-7.26 (m, 1H), 6.09 (s, 1H), 6.06 (t, *J* = 1.3 Hz, 1H), 5.63-5.61 (m, 1H), 5.40-5.38 (m, 1H), 4.06 (d, *J* = 14.7 Hz, 1H), 3.70 (dt, *J* = 15.0, 3.0 Hz, 1H), 3.63 (s, 3H), 3.34 (s, 3H), 2.93 (d, *J* = 13.0 Hz, 1H), 2.47 (d, *J* = 13.0 Hz, 1H). <sup>13</sup>C NMR (125 MHz, CDCl<sub>3</sub>) δ 166.56, 166.50, 145.22, 136.64, 136.54, 134.17, 130.29, 129.18, 128.96, 128.49, 128.23, 127.69, 127.43, 118.73, 71.03, 52.63, 51.69, 42.74. IR (KBr): 3348, 3061, 2929, 2854, 2224, 1725, 1633, 1494, 1200, 1155, 729, 703 cm<sup>-1</sup>. HRMS (ESI): calcd. for C<sub>24</sub>H<sub>25</sub>N<sub>2</sub>O<sub>4</sub> ([M+H]<sup>+</sup>): 405.1809, found 405.1815.

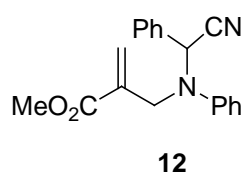

Inseparate mixture of **12**, **1a** and ether **8** (See Table 1).

<sup>1</sup>H NMR (300 MHz, CDCl<sub>3</sub>) δ 7.52 – 7.38 (m, 5H), 7.30 – 7.25 (m, 2H), 6.99 – 6.89 (m, 3H), 6.25 – 6.24 (m, 1H), 5.85 (s, 1H), 5.74 – 5.73 (m, 1H), 4.20 (d, *J* = 18.0 Hz, 1H), 4.07 (d, *J* = 17.8 Hz, 1H). HRMS (ESI): calcd. for C<sub>19</sub>H<sub>19</sub>N<sub>2</sub>O<sub>2</sub> ([M+H]<sup>+</sup>): 307.1441, found 307.1435.

## V. General Procedure for the Synthesis of α-Methylene-γ-Butyrolactones

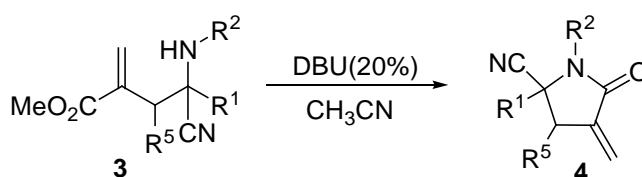



To a dried round-bottom flask were added **3** (0.25 mmol) and CH<sub>3</sub>CN (2.5 mL). To this solution was added DBU (20%) at 0 °C and the mixture was warmed to rt. The reaction was monitored by TLC. Upon completion, the reaction mixture was washed with brine. The mixture was extracted with ethyl acetate. The combined organic extract was dried over anhydrous Na<sub>2</sub>SO<sub>4</sub>, filtered and concentrated *in vacuo*. The crude mixture was purified by column chromatography (silica gel, EtOAc/Petroleum) to provide **4**.

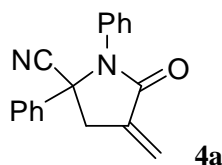

**4a:** This compound was prepared according to the general procedure and was purified by flash chromatography (silica gel, EtOAc/Petroleum = 1:6), which afforded 61 mg of a white solid (89%, yield). mp 80-82 °C. <sup>1</sup>H NMR (300 MHz, CDCl<sub>3</sub>) δ 7.49 – 7.45 (m, 2H), 7.41 – 7.37 (m, 3H), 7.31 – 7.20 (m, 5H), 6.38 (t, *J* = 2.6 Hz, 1H), 5.66 (t, *J* = 2.3 Hz, 1H), 3.75 (dt, *J* = 17.0, 2.4 Hz, 1H), 3.32 (dt, *J* = 17.0, 2.7 Hz, 1H). <sup>13</sup>C NMR (100 MHz, CDCl<sub>3</sub>) δ 166.42, 136.76, 135.47, 134.78, 129.45, 129.22, 128.89, 127.45, 125.79, 125.35, 119.69, 118.81, 63.61, 43.16. IR (KBr): 3062, 3008, 2927, 2854, 1717, 1661, 1592, 1491, 1452, 1350, 759, 699 cm<sup>-1</sup>. HRMS (ESI): calcd. for C<sub>18</sub>H<sub>15</sub>N<sub>2</sub>O ([M+H]<sup>+</sup>): 275.1179, found 275.1172.

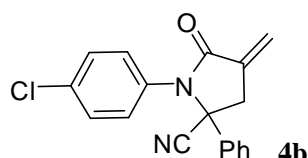

**4b:** This compound was prepared according to the general procedure and was purified by flash chromatography (silica gel, EtOAc/Petroleum = 1:12), which afforded 51 mg of a white solid (66%, yield). mp 75-77 °C. <sup>1</sup>H NMR (300 MHz, CDCl<sub>3</sub>) δ 7.47 – 7.39 (m, 5H), 7.25 (d, *J* = 8.8 Hz, 2H), 7.16 (d, *J* = 8.8 Hz, 2H), 6.38 (t, *J* = 2.5 Hz, 1H), 5.67 (t, *J* = 2.1 Hz, 1H), 3.75 (dt, *J* = 17.0, 2.2 Hz, 1H), 3.30 (dt, *J* = 17.0, 2.4 Hz, 1H). <sup>13</sup>C NMR (100 MHz, CDCl<sub>3</sub>) δ 166.41, 136.51, 134.49, 134.07, 133.22, 129.71, 129.45, 129.19, 126.99, 125.34, 120.22, 118.68, 63.58, 43.17. IR (KBr): 3105, 3049, 2955, 2921, 1714, 1665, 1493, 1452, 1340, 828, 759, 696 cm<sup>-1</sup>. HRMS (ESI): calcd. for C<sub>18</sub>H<sub>14</sub>ClN<sub>2</sub>O ([M+H]<sup>+</sup>): 309.0789, found 309.0798.

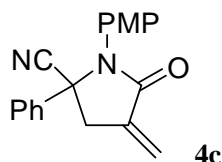

**4c:** This compound was prepared according to the general procedure and was purified by flash chromatography (silica gel, EtOAc/Petroleum = 1:12), which afforded 70 mg of a white solid (92%, yield). mp 100-102 °C. <sup>1</sup>H NMR (300 MHz, CDCl<sub>3</sub>) δ 7.48-7.44 (m, 2H), 7.40-7.37 (m, 3H), 7.05 (d, *J* = 9.0 Hz, 2H), 6.77 (d, *J* = 9.1 Hz, 2H), 6.34 (t, *J* = 2.7 Hz, 1H), 5.63 (t, *J* = 2.3 Hz, 1H),

3.76 – 3.69 (m, 1H), 3.71 (s, 3H), 3.33 (dt,  $J = 17.2, 2.6$  Hz, 1H).  $^{13}\text{C}$  NMR (100 MHz,  $\text{CDCl}_3$ )  $\delta$  166.63, 158.77, 136.82, 134.80, 129.46, 129.15, 127.95, 127.87, 125.50, 119.38, 118.82, 114.24, 63.95, 55.14, 42.58. IR (KBr): 3106, 3063, 2959, 2937, 2909, 1716, 1670, 1511, 1451, 1356, 1255, 828, 751, 699  $\text{cm}^{-1}$ . HRMS (ESI): calcd. for  $\text{C}_{19}\text{H}_{17}\text{N}_2\text{O}_2$  ( $[\text{M}+\text{H}]^+$ ): 305.1285, found 305.1281.

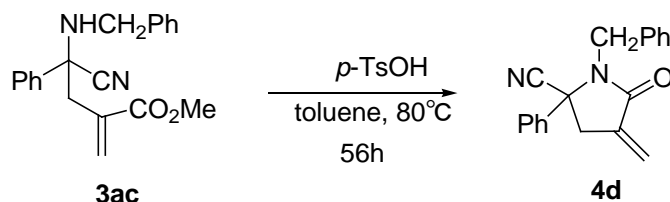

To a solution of **3ac** (98 mg, 0.3 mmol) in toluene (3 ml) was added  $p$ -TsOH (10 mg, 0.06 mmol) and stirred at  $80^\circ\text{C}$  for 56 h.<sup>7</sup> The mixture was filtrated through a pad of Celite and the precipitate washed with dichloromethane ( $3 \times 10$  ml). The organic phase was evaporated in vapor and the residue was purified by flash chromatography (silica gel, EtOAc/Petroleum = 1:6) to give **4d** (45 mg, 52%) as yellow oil.

**4d**:  $^1\text{H}$  NMR (300 MHz,  $\text{CDCl}_3$ )  $\delta$  7.38 – 7.33 (m, 5H), 7.21 – 7.16 (m, 3H), 7.12 – 7.09 (m, 2H), 6.30 (t,  $J = 2.7$  Hz, 1H), 5.56 (t,  $J = 2.3$  Hz, 1H), 4.73 (d,  $J = 14.9$  Hz, 1H), 4.18 (d,  $J = 14.9$  Hz, 1H), 3.58 (dt,  $J = 17.3, 2.4$  Hz, 1H), 3.14 (dt,  $J = 17.3, 2.7$  Hz, 1H).  $^{13}\text{C}$  NMR (75 MHz,  $\text{CDCl}_3$ )  $\delta$  167.48, 136.02, 135.20, 134.60, 129.60, 129.25, 129.00, 128.28, 127.78, 125.62, 119.00, 118.15, 62.20, 45.67, 42.81. IR (KBr): 3065, 2956, 2852, 1709, 1665, 1497, 1452, 1355, 764, 701  $\text{cm}^{-1}$ . HRMS (ESI): calcd. for  $\text{C}_{19}\text{H}_{17}\text{N}_2\text{O}$  ( $[\text{M}+\text{H}]^+$ ): 289.1335, found 289.1338.

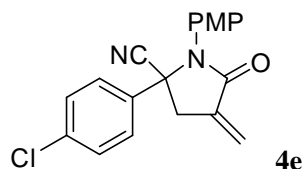

**4e**: This compound was prepared according to the general procedure and was purified by flash chromatography (silica gel, EtOAc/Petroleum = 1:6), which afforded 69 mg of a white solid (82%, yield). mp  $136\text{--}137^\circ\text{C}$ .  $^1\text{H}$  NMR (300 MHz,  $\text{CDCl}_3$ )  $\delta$  7.42 – 7.35 (m, 4H), 7.05 (d,  $J = 9.0$  Hz, 2H), 6.80 (d,  $J = 9.0$  Hz, 2H), 6.37 (t,  $J = 2.7$  Hz, 1H), 5.66 (t,  $J = 2.3$  Hz, 1H), 3.78–3.71 (m, 1H), 3.75 (s, 3H), 3.28 (dt,  $J = 17.1, 2.6$  Hz, 1H).  $^{13}\text{C}$  NMR (75 MHz,  $\text{CDCl}_3$ )  $\delta$  161.52, 153.90, 130.51, 130.31, 129.36, 124.33, 122.84, 122.63, 122.02, 114.76, 113.51, 109.34, 58.42, 50.15, 37.44. IR (KBr): 3057, 3040, 2972, 2841, 1714, 1663, 1513, 1356, 1250, 823  $\text{cm}^{-1}$ . HRMS (ESI): calcd. for  $\text{C}_{19}\text{H}_{16}\text{ClN}_2\text{O}_2$  ( $[\text{M}+\text{H}]^+$ ): 339.0895, found 339.0903.

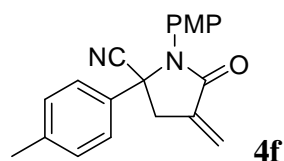

**4f**: This compound was prepared according to the general procedure and was purified by flash

chromatography (silica gel, EtOAc/Petroleum = 1:6), which afforded 64 mg of a white amorphous solid (81%, yield).  $^1\text{H}$  NMR (300 MHz,  $\text{CDCl}_3$ )  $\delta$  7.34 (d,  $J$  = 8.4 Hz, 2H), 7.18 (d,  $J$  = 8.1 Hz, 2H), 7.05 (d,  $J$  = 9.0 Hz, 2H), 6.78 (d,  $J$  = 9.0 Hz, 2H), 6.34 (t,  $J$  = 2.7 Hz, 1H), 5.63 (t,  $J$  = 2.3 Hz, 1H), 3.76 – 3.68 (m, 1H), 3.74 (s, 3H), 3.31 (dt,  $J$  = 17.1, 2.6 Hz, 1H), 2.35 (s, 3H).  $^{13}\text{C}$  NMR (75 MHz,  $\text{CDCl}_3$ )  $\delta$  161.65, 153.75, 134.49, 129.89, 128.73, 124.74, 122.87, 120.40, 114.26, 113.93, 109.17, 58.78, 50.10, 37.61, 15.87. IR (KBr): 3031, 2957, 2933, 2839, 1713, 1663, 1513, 1358, 1249, 830, 815  $\text{cm}^{-1}$ . HRMS (ESI): calcd. for  $\text{C}_{20}\text{H}_{19}\text{N}_2\text{O}_2$  ( $[\text{M}+\text{H}]^+$ ): 319.1441, found 319.1446.

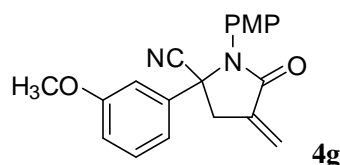

**4g:** This compound was prepared according to the general procedure and was purified by flash chromatography (silica gel, EtOAc/Petroleum = 1:6), which afforded 58 mg of a white solid (70%, yield). mp 107-109°C.  $^1\text{H}$  NMR (300 MHz,  $\text{CDCl}_3$ )  $\delta$  7.31 (t,  $J$  = 8.0 Hz, 1H), 7.12-7.08 (m, 2H), 7.06-7.03 (m, 1H), 6.98 – 6.96 (m, 1H), 6.91-6.88 (m, 1H), 6.82 – 6.79 (m, 2H), 6.35 (t,  $J$  = 2.7 Hz, 1H), 5.64 (t,  $J$  = 2.3 Hz, 1H), 3.78 (s, 3H), 3.76 – 3.68 (m, 1H), 3.75 (s, 3H), 3.31 (dt,  $J$  = 17.2, 2.6 Hz, 1H).  $^{13}\text{C}$  NMR (75 MHz,  $\text{CDCl}_3$ )  $\delta$  166.72, 160.04, 158.81, 138.39, 134.76, 130.36, 127.99, 127.77, 119.49, 118.84, 117.58, 114.58, 114.27, 111.52, 63.88, 55.26, 55.19, 42.63. IR (KBr): 3069, 2967, 2840, 2239, 1714, 1662, 1601, 1513, 1494, 1465, 1355, 1248, 812, 793, 704  $\text{cm}^{-1}$ . HRMS (ESI): calcd. For  $\text{C}_{20}\text{H}_{19}\text{N}_2\text{O}_3$  ( $[\text{M}+\text{H}]^+$ ): 335.1390, found 335.1384.

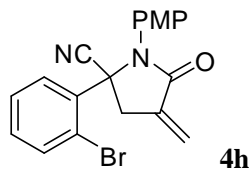

**4h:** This compound was prepared according to the general procedure and was purified by flash chromatography (silica gel, EtOAc/Petroleum = 1:6), which afforded 55 mg of a colorless oil (58%, yield).  $^1\text{H}$  NMR (300 MHz,  $\text{CDCl}_3$ )  $\delta$  7.77-7.74 (m, 1H), 7.67-7.64 (m, 1H), 7.35-7.30 (m, 1H), 7.28 – 7.21 (m, 3H), 6.82-6.77 (m, 2H), 6.37 (t,  $J$  = 2.6 Hz, 1H), 5.64 (t,  $J$  = 2.3 Hz, 1H), 3.79 (dt,  $J$  = 17.6, 2.7 Hz, 1H), 3.73 (s, 3H), 3.67 (dt,  $J$  = 17.6, 2.2 Hz, 1H).  $^{13}\text{C}$  NMR (100 MHz,  $\text{CDCl}_3$ )  $\delta$  167.11, 158.75, 136.18, 135.14, 132.69, 131.19, 130.80, 127.98, 127.86, 127.21, 120.52, 119.46, 118.91, 114.22, 65.35, 55.18, 39.52. IR (film): 3059, 2961, 2840, 1714, 1663, 1514, 1362, 1264, 736, 702  $\text{cm}^{-1}$ . HRMS (ESI): calcd. for  $\text{C}_{19}\text{H}_{16}\text{BrN}_2\text{O}_2$  ( $[\text{M}+\text{H}]^+$ ): 383.0390, found 383.0393.

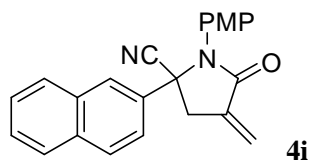

**4i:** This compound was prepared according to the general procedure and was purified by flash chromatography (silica gel, EtOAc/Petroleum = 1:12), which afforded 75 mg of a white solid (85%, yield). mp 135-136 °C.  $^1\text{H}$  NMR (300 MHz,  $\text{CDCl}_3$ )  $\delta$  8.00 – 7.99 (m, 1H), 7.90 (d,  $J$  = 8.7 Hz, 1H), 7.86 – 7.82 (m, 2H), 7.59 – 7.51 (m, 2H), 7.45 (dd,  $J$  = 8.8, 2.1 Hz, 1H), 7.08 (d,  $J$  = 9.1

Hz, 2H), 6.74 (d,  $J = 9.1$  Hz, 2H), 6.40 (t,  $J = 2.6$  Hz, 1H), 5.67 (t,  $J = 2.2$  Hz, 1H), 3.80 (dt,  $J = 17.3, 2.3$  Hz, 1H), 3.70 (s, 3H), 3.42 (dt,  $J = 17.3, 2.6$  Hz, 1H).  $^{13}\text{C}$  NMR (75 MHz,  $\text{CDCl}_3$ )  $\delta$  161.83, 153.84, 129.80, 128.77, 128.14, 127.46, 124.71, 123.25, 122.96, 122.89, 122.55, 122.33, 122.10, 120.96, 116.54, 114.55, 113.90, 109.27, 59.22, 50.05, 37.33. IR (KBr): 3003, 2966, 2853, 1719, 1653, 1559, 1541, 1507, 1251, 828  $\text{cm}^{-1}$ . HRMS (ESI): calcd. For  $\text{C}_{23}\text{H}_{19}\text{N}_2\text{O}_2$  ( $[\text{M}+\text{H}]^+$ ): 355.1441, found 355.1443.

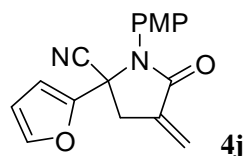

**4j**: This compound was prepared according to the general procedure and was purified by flash chromatography (silica gel, EtOAc/Petroleum = 1:6), which afforded 40 mg of a yellow oil (55%, yield).  $^1\text{H}$  NMR (300 MHz,  $\text{CDCl}_3$ )  $\delta$  7.47 (dd,  $J = 1.9, 0.9$  Hz, 1H), 6.93-6.89 (m, 2H), 6.87-6.82 (m, 2H), 6.48 (dd,  $J = 3.4, 0.9$  Hz, 1H), 6.34-6.32 (m, 2H), 5.66 (t,  $J = 2.3$  Hz, 1H), 3.78 (s, 3H), 3.64 (dt,  $J = 17.1, 2.7$  Hz, 1H), 3.56 (dt,  $J = 16.8, 2.1$  Hz, 1H).  $^{13}\text{C}$  NMR (75 MHz,  $\text{CDCl}_3$ )  $\delta$  166.50, 159.64, 146.79, 144.29, 134.36, 128.97, 127.17, 119.43, 117.64, 114.53, 112.04, 110.97, 59.07, 55.28, 37.68. IR (film): 3061, 2963, 2935, 2840, 1711, 1668, 1512, 1362, 1265, 829  $\text{cm}^{-1}$ . HRMS (ESI): calcd. for  $\text{C}_{17}\text{H}_{15}\text{N}_2\text{O}_3$  ( $[\text{M}+\text{H}]^+$ ): 295.1077, found 295.1080.

#### Procedure for the One Pot Synthesis of $\alpha$ -Methylene- $\gamma$ -Butyrolactam

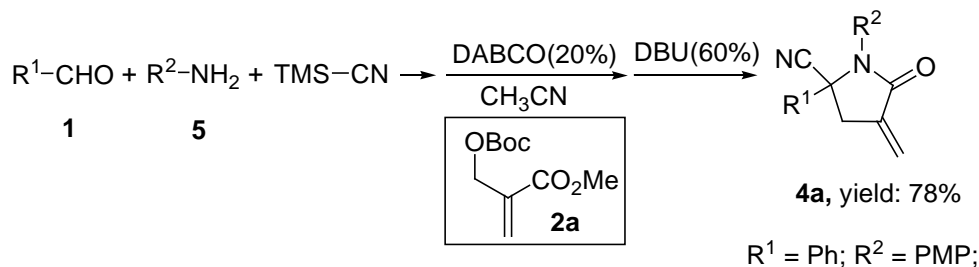

To a dried reaction tube were added aldehyde (0.3 mmol) and amine (0.315 mmol). After the mixture was stirred at rt for 10 min,  $\text{TMSCN}$  (0.33 mmol) was added. After the mixture was vigorously stirred for 50 min,  $\text{CH}_3\text{CN}$  (3 ml), DABCO (20%) and **2a** (0.45 mmol) were added. The reaction was monitored by TLC. After 2.5 h, DBU (60%) was added to the above mixture. Upon completion, the stirring bar was removed and the mixture was evaporated under reduced pressure to give the crude products. The crude mixture was purified by column chromatography (silica gel, EtOAc/Petroleum) to provide **4a**.

#### VI. Procedure for Chemical Transformations

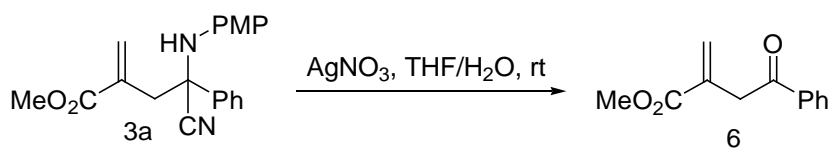

**3a** (33.6 mg, 0.1 mmol) was dissolved in THF (0.68 mL) and treated with an aqueous solution (0.1 mL) of  $\text{AgNO}_3$  (33.9 mg, 0.2 mmol) <sup>5</sup>. After stirring at room temperature for 18h, the solution was

filtrated through a pad of Celite and the precipitate washed with ether (2×5 mL) and water (5 mL). The aqueous phase was extracted with ether (3×5 mL), the combined organic phase washed with brine (2×5 mL) and water (5 mL), dried over anhydrous Na<sub>2</sub>SO<sub>4</sub>, filtered and the solvent removed in vacuo. Purification by flash chromatography (silica gel, EtOAc/Petroleum 1/10) afforded the (16 mg, 78%) as red brown oil.<sup>9</sup>

<sup>1</sup>H NMR (300 MHz, CDCl<sub>3</sub>) δ 8.09 – 7.90 (m, 2H), 7.66 – 7.31 (m, 3H), 6.51 – 6.30 (m, 1H), 5.79 – 5.60 (m, 1H), 4.10 – 3.95 (m, 2H), 3.74 (s, 3H). <sup>13</sup>C NMR (75 MHz, CDCl<sub>3</sub>) δ 196.84, 166.95, 136.59, 134.64, 133.33, 128.71, 128.66, 128.32, 52.15, 41.78.

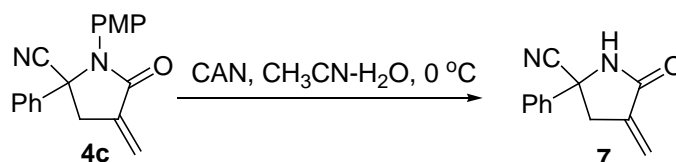

To a solution of **4c** (213 mg, 0.7 mmol) in CH<sub>3</sub>CN (5.0 ml) was added aqueous cerium ammonium nitrate (1.9 g, 3.43 mmol) solution (5.0 ml) at 0 °C. <sup>6</sup> After being stirred at 0 °C for 4 h, the reaction mixture was quenched by addition of sat. NaHCO<sub>3</sub> (aq.) solution (15 ml). The aqueous layer was extracted with diethyl ether (10 ml) and the combined organic layers were successively washed with 5% Na<sub>2</sub>SO<sub>3</sub> solution, sat. NaHCO<sub>3</sub> (aq.) solution and brine, and dried over anhydrous Na<sub>2</sub>SO<sub>4</sub>. The solvent was evaporated in vacuo to leave crude material, which was purified by column chromatography (silica gel, EtOAc/Petroleum = 1:5) to afford 58 mg of a white solid in 42% yield. mp 88-90 °C.

<sup>1</sup>H NMR (300 MHz, CDCl<sub>3</sub>) δ 7.56-7.42 (m, 5H), 6.20 (t, *J* = 2.7 Hz, 1H), 5.55 – 5.54 (m, 1H), 3.65 (dt, *J* = 17.1, 2.1 Hz, 1H), 3.10 (dt, *J* = 17.1, 2.7 Hz, 1H). <sup>13</sup>C NMR (75 MHz, CDCl<sub>3</sub>) δ 169.87, 138.23, 135.11, 129.48, 129.43, 124.62, 119.98, 119.57, 57.20, 43.76. IR (KBr): 3438, 3011, 2927, 2856, 1680, 1632, 1527, 1346, 740 cm<sup>-1</sup>. HRMS (ESI): calcd. for C<sub>12</sub>H<sub>11</sub>N<sub>2</sub>O ([M+H]<sup>+</sup>): 199.0866, found 199.0868.

## VII. NMR Spectra and HPLC Spectra

## VIII. References

1. A. Baeza and J. M. Sansano, *Synthesis*, 2007, **8**, 1230.
2. Y. Du, X. L. Han and X. Lu, *Tetrahedron Lett.*, 2004, **45**, 4967.
3. Y. Du, X. Lu and C. Zhang, *Angew. Chem., Int. Ed.*, 2003, **42**, 1035.
4. C. Yu, B. Liu and L. Hu, *J. Org. Chem.*, 2001, **66**, 5413.
5. F. Pierre and D. Enders, *Tetrahedron Lett.*, 1999, **40**, 5301.
6. J. Takaya, H. Kagoshima and T. Akiyama, *Org. Lett.*, 2000, **2**, 1577.
7. R. A. Fernandes and Y. Yamamoto, *J. Org. Chem.*, 2004, **69**, 3562.
8. S. E. Drewes, G. Loizou and G. H. P. Roos, *Synth. Commun.*, 1987, **17**, 291.
9. Z. Zhuang, F. Pan, J.-G. Fu, J.-M. Chen and W.-W. Liao, *Org. Lett.*, 2011, **13**, 6164.
